# Supplementary material
Source: PubMed Central journal article supplement (PMC3184385)
Supplement: NIHMS323494-supplement-1_si_001.pdf [file NIHMS323494-supplement-1_si_001.pdf]

# Computational Studies of Lithium Diisopropylamide Deaggregation

Alexander C. Hoepker and David B. Collum\*

Department of Chemistry and Chemical Biology  
Baker Laboratory, Cornell University, Ithaca, New York 14853-1301

## Supporting Information

|                   | Page                                                  |     |
|-------------------|-------------------------------------------------------|-----|
| <b>Scheme 1</b>   | Summary of computed structures                        | S2  |
| <b>Scheme 2</b>   | Potential energy surface                              | S3  |
| <b>Scheme 3</b>   | Potential energy surface of tetrasolvates             | S4  |
| <b>Table 1</b>    | Cartesian coordinates of ground and transition states | S5  |
| <b>Table 2</b>    | Cartesian coordinates of disolvated dimers            | S37 |
| <b>Table 3</b>    | Cartesian coordinates of trisolvated dimers           | S50 |
| <b>Note</b>       | Basis Set Superposition Errors                        | S58 |
| <b>References</b> |                                                       | S59 |



Scheme 2 (Scheme 2 in paper)

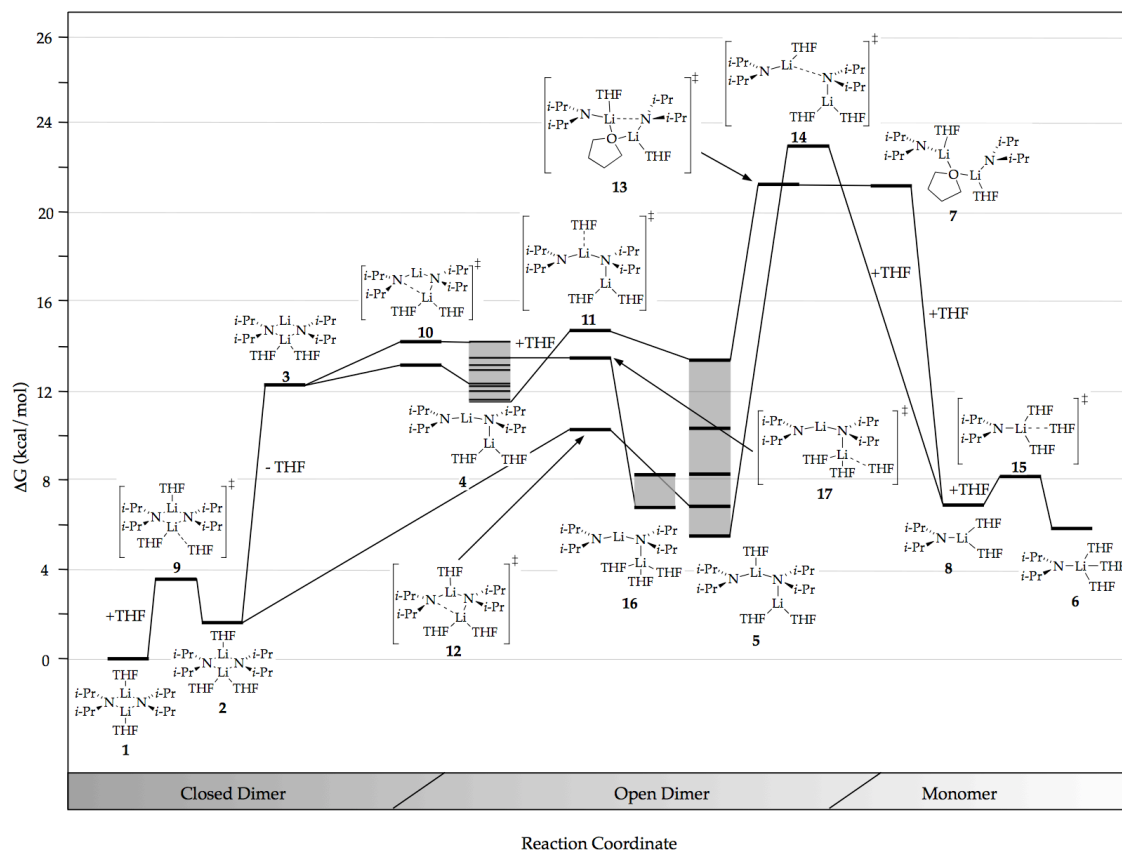

Scheme 3 (Scheme 6 in paper)

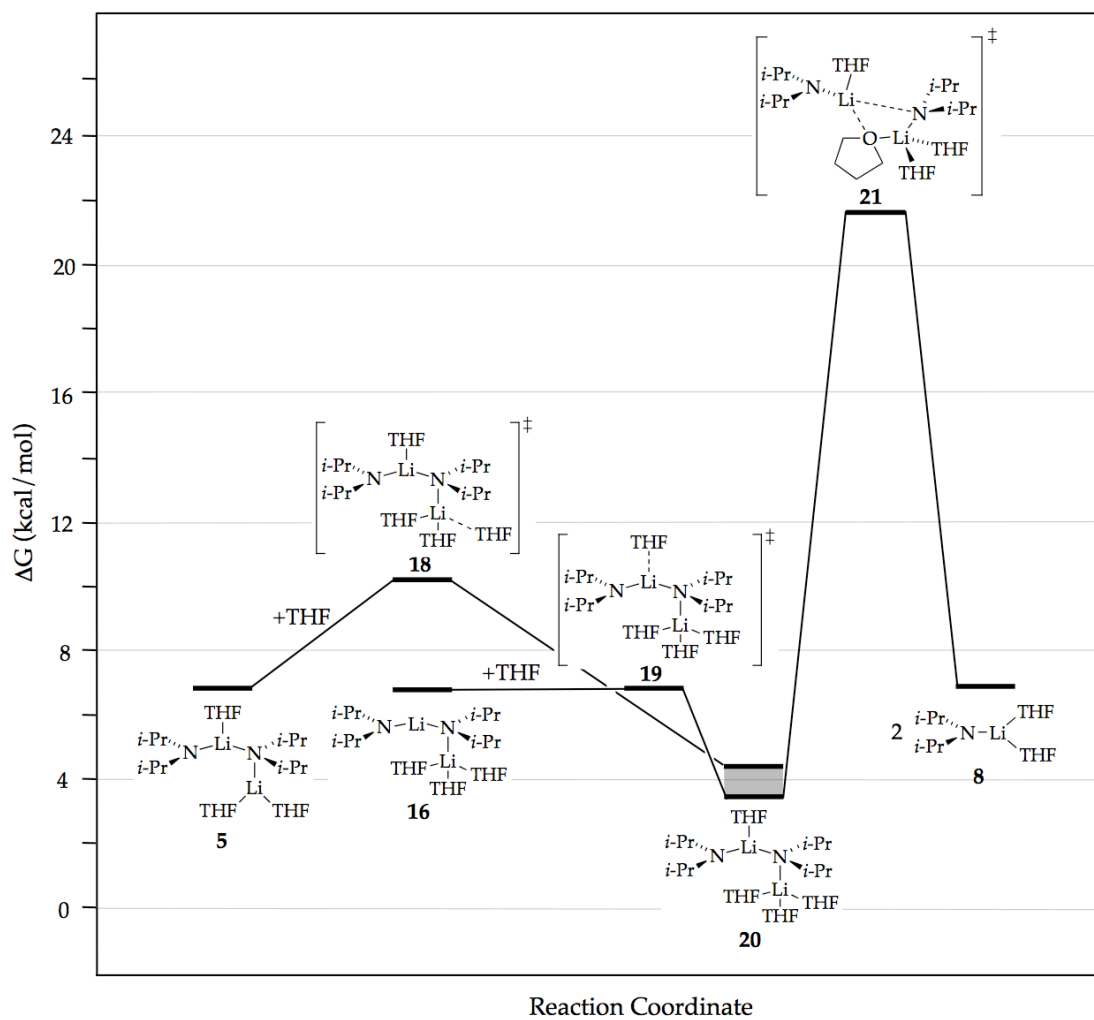

**Table 1.** Optimized geometries at the B3LYP level of theory with 6-31G(d) basis set of THF disolvated, trisolvated and tetrasolvated LDA aggregates including closed and open dimers as well as monomers at -78 °C with free energies (Hartrees) and cartesian coordinates (X, Y, Z). Single point MP2 energies are included.  $\Delta G^\ddagger$  and  $\Delta G$  (when reported) is the difference in free energy relative to disolvated LDA dimer **1**.

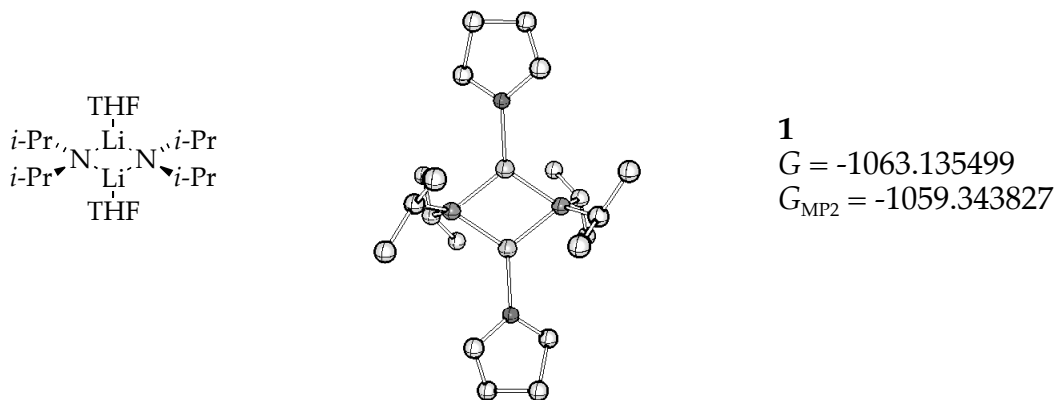

| Atom | X         | Y         | Z         | Atom | X         | Y         | Z         |
|------|-----------|-----------|-----------|------|-----------|-----------|-----------|
| Li   | -1.194627 | -0.007825 | 0.022332  | C    | 4.032339  | -1.143606 | 0.199177  |
| N    | 0.013907  | 1.643769  | 0.077205  | C    | 5.437966  | -0.758062 | -0.271094 |
| C    | 0.196558  | 2.410032  | 1.319032  | C    | 5.411742  | 0.774063  | -0.154916 |
| C    | 1.159764  | 1.707079  | 2.290512  | C    | 3.984087  | 1.095274  | -0.593500 |
| H    | 2.159075  | 1.604292  | 1.849772  | H    | 3.902781  | 1.157446  | -1.686665 |
| H    | 1.262404  | 2.264200  | 3.230548  | H    | 3.572808  | 2.009642  | -0.160821 |
| H    | 0.802179  | 0.701928  | 2.550069  | H    | 6.162143  | 1.270000  | -0.777688 |
| C    | -1.131524 | 2.719155  | 2.048700  | H    | 5.571005  | 1.083108  | 0.884979  |
| H    | -1.598978 | 1.790545  | 2.404654  | H    | 5.590704  | -1.057380 | -1.314703 |
| H    | -0.983501 | 3.376104  | 2.917980  | H    | 6.219980  | -1.226951 | 0.333343  |
| H    | -1.838550 | 3.216969  | 1.374689  | H    | 3.991648  | -1.300598 | 1.282899  |
| H    | 0.658344  | 3.392275  | 1.104388  | H    | 3.630188  | -2.031035 | -0.296809 |
| Li   | 1.194600  | 0.007938  | 0.022158  | C    | -0.277970 | 2.554246  | -1.035528 |
| N    | -0.013962 | -1.643687 | 0.077247  | C    | -0.932408 | 1.814820  | -2.212599 |
| C    | -0.196637 | -2.409858 | 1.319127  | H    | -1.876483 | 1.339255  | -1.919253 |
| C    | 1.131405  | -2.718766 | 2.048953  | H    | -1.147122 | 2.498323  | -3.043671 |
| H    | 1.598735  | -1.790078 | 2.404863  | H    | -0.264714 | 1.033138  | -2.596792 |
| H    | 0.983363  | -3.375653 | 2.918275  | C    | 0.961585  | 3.312183  | -1.569417 |
| H    | 1.838548  | -3.216575 | 1.375059  | H    | 1.655983  | 2.609117  | -2.049010 |
| C    | -1.160039 | -1.706940 | 2.290445  | H    | 0.685387  | 4.074299  | -2.312169 |
| H    | -2.159328 | -1.604365 | 1.849606  | H    | 1.500736  | 3.820562  | -0.761989 |
| H    | -1.262680 | -2.263956 | 3.230543  | H    | -1.002510 | 3.335320  | -0.721398 |
| H    | -0.802631 | -0.701703 | 2.549918  | O    | -3.182976 | 0.015599  | -0.128112 |
| H    | -0.658276 | -3.392178 | 1.104519  | C    | -3.983928 | -1.095127 | -0.594129 |
| C    | 0.278101  | -2.554233 | -1.035377 | C    | -5.411404 | -0.774615 | -0.154519 |
| C    | -0.961328 | -3.312344 | -1.569312 | C    | -5.438354 | 0.757507  | -0.270589 |
| H    | -1.655760 | -2.609392 | -2.049018 | C    | -4.032490 | 1.143719  | 0.198539  |
| H    | -0.684990 | -4.074495 | -2.311978 | H    | -3.991063 | 1.301394  | 1.282122  |

**Table 1 (continued).**

|   |           |           |           |   |           |           |           |
|---|-----------|-----------|-----------|---|-----------|-----------|-----------|
| H | -1.500486 | -3.820717 | -0.761885 | H | -3.630993 | 2.030985  | -0.298285 |
| C | 0.932582  | -1.814844 | -2.212451 | H | -6.220074 | 1.226032  | 0.334511  |
| H | 1.876607  | -1.339195 | -1.919069 | H | -5.592104 | 1.056795  | -1.314054 |
| H | 1.147416  | -2.498388 | -3.043457 | H | -5.569779 | -1.083823 | 0.885463  |
| H | 0.264859  | -1.033240 | -2.596749 | H | -6.162035 | -1.270817 | -0.776806 |
| H | 1.002689  | -3.335209 | -0.721109 | H | -3.903299 | -1.156675 | -1.687391 |
| O | 3.182976  | -0.015444 | -0.127663 | H | -3.572024 | -2.009558 | -0.162195 |

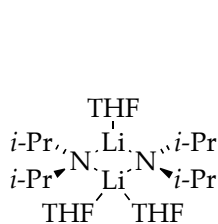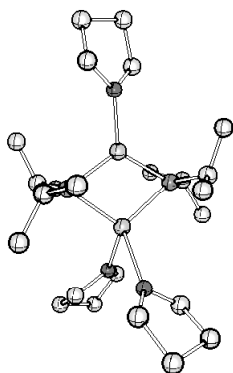

**2**  
 $G = -1295.468552$   
 $G_{\text{MP2}} = -1290.911118$   
 $\Delta G = 10.2 \text{ kcal/mol}$   
 $\Delta G_{\text{MP2}} = 1.6 \text{ kcal/mol}$

| Atom | X         | Y         | Z         | Atom | X         | Y         | Z         |
|------|-----------|-----------|-----------|------|-----------|-----------|-----------|
| Li   | 0.818515  | -0.011749 | 0.004258  | H    | -6.633962 | -0.029432 | 1.356314  |
| N    | -0.496059 | -1.437484 | 0.988166  | H    | -6.620794 | 0.423336  | -1.339571 |
| C    | -0.681340 | -2.820306 | 0.515699  | H    | -5.838785 | 1.620894  | -0.288742 |
| C    | -0.333526 | -2.984896 | -0.967682 | H    | -3.951622 | 1.036081  | -1.700686 |
| H    | 0.670807  | -2.607385 | -1.178994 | H    | -4.495241 | -0.657976 | -1.834598 |
| H    | -0.381100 | -4.040340 | -1.266183 | C    | -0.453127 | -1.446768 | 2.457559  |
| H    | -1.040201 | -2.437207 | -1.601717 | C    | -0.775698 | -0.071705 | 3.052081  |
| C    | -2.113477 | -3.378256 | 0.727230  | H    | -1.767842 | 0.274567  | 2.733930  |
| H    | -2.829240 | -2.817093 | 0.111600  | H    | -0.768881 | -0.099513 | 4.149612  |
| H    | -2.178574 | -4.438251 | 0.443040  | H    | -0.043473 | 0.678653  | 2.735678  |
| H    | -2.434446 | -3.302876 | 1.772178  | C    | 0.891450  | -1.938843 | 3.048504  |
| H    | -0.007660 | -3.513315 | 1.059369  | H    | 1.700346  | -1.247902 | 2.782079  |
| Li   | -1.642109 | -0.068981 | 0.010468  | H    | 0.851865  | -2.012142 | 4.144778  |
| N    | -0.569511 | 1.360057  | -0.965104 | H    | 1.158485  | -2.930282 | 2.665912  |
| C    | -0.549529 | 1.365185  | -2.434744 | H    | -1.219905 | -2.131912 | 2.868840  |
| C    | 0.748338  | 1.941691  | -3.054151 | O    | 2.485894  | 1.082386  | 1.028619  |
| H    | 1.608142  | 1.312977  | -2.792467 | C    | 3.164391  | 1.956383  | 0.097963  |
| H    | 0.684827  | 1.994694  | -4.150329 | C    | 3.776576  | 3.069184  | 0.948373  |
| H    | 0.952920  | 2.955213  | -2.691895 | C    | 4.115724  | 2.319506  | 2.245463  |
| C    | -0.786821 | -0.033966 | -3.012818 | C    | 2.934390  | 1.352405  | 2.374768  |
| H    | -1.748285 | -0.444678 | -2.678085 | H    | 2.105362  | 1.801073  | 2.936113  |
| H    | -0.797335 | -0.016146 | -4.110432 | H    | 3.200641  | 0.404757  | 2.851643  |
| H    | -0.000717 | -0.729344 | -2.700209 | H    | 4.214220  | 2.974542  | 3.116342  |
| H    | -1.367862 | 1.992878  | -2.839386 | H    | 5.055614  | 1.766125  | 2.130254  |

**Table 1 (continued).**

|   |           |           |           |   |          |           |           |
|---|-----------|-----------|-----------|---|----------|-----------|-----------|
| C | -0.791028 | 2.733856  | -0.483994 | H | 3.035753 | 3.853730  | 1.140987  |
| C | -2.229862 | 3.269764  | -0.707945 | H | 4.647250 | 3.530557  | 0.472262  |
| H | -2.944776 | 2.684342  | -0.113865 | H | 3.937435 | 1.380593  | -0.428505 |
| H | -2.316965 | 4.321898  | -0.401935 | H | 2.426359 | 2.301410  | -0.629022 |
| H | -2.536145 | 3.213526  | -1.758343 | O | 2.525183 | -1.005662 | -1.041557 |
| C | -0.470385 | 2.886557  | 1.006609  | C | 3.282317 | -1.819904 | -0.116349 |
| H | 0.538433  | 2.528638  | 1.229448  | C | 3.958762 | -2.894665 | -0.967381 |
| H | -0.545946 | 3.936783  | 1.317484  | C | 4.206898 | -2.142148 | -2.283001 |
| H | -1.175044 | 2.315104  | 1.621929  | C | 2.948149 | -1.276745 | -2.395801 |
| H | -0.123400 | 3.447978  | -1.007964 | H | 2.141299 | -1.808150 | -2.915950 |
| O | -3.634504 | -0.116304 | -0.021547 | H | 3.119497 | -0.324230 | -2.904790 |
| C | -4.443741 | 0.217064  | -1.172605 | H | 4.337341 | -2.801529 | -3.146378 |
| C | -5.818902 | 0.572918  | -0.610332 | H | 5.100957 | -1.512412 | -2.199075 |
| C | -5.914867 | -0.365209 | 0.603246  | H | 3.277713 | -3.737798 | -1.130865 |
| C | -4.476736 | -0.361501 | 1.130763  | H | 4.873836 | -3.279474 | -0.506742 |
| H | -4.170055 | -1.307364 | 1.583443  | H | 4.020134 | -1.183456 | 0.389667  |
| H | -4.313695 | 0.447729  | 1.853649  | H | 2.585845 | -2.211297 | 0.628166  |
| H | -6.203684 | -1.373366 | 0.283550  |   |          |           |           |

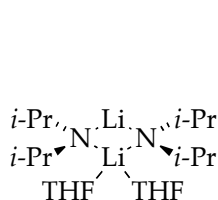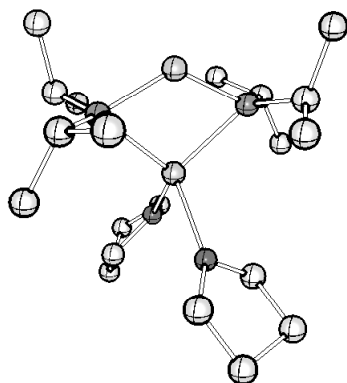

**3**  
 $G = -1063.113999$   
 $G_{\text{MP2}} = -1059.324336$   
 $\Delta G = 13.5 \text{ kcal/mol}$   
 $\Delta G_{\text{MP2}} = 12.2 \text{ kcal/mol}$

Closed dimer 3 connects directly to closed trisolvated LDA dimer 2.

| Atom | X         | Y         | Z         | Atom | X         | Y         | Z         |
|------|-----------|-----------|-----------|------|-----------|-----------|-----------|
| C    | -1.953915 | -0.136916 | -2.517778 | H    | 1.626270  | -2.544548 | -0.586163 |
| N    | -2.024230 | 0.029074  | -1.058690 | C    | -0.811157 | -4.348437 | 1.104056  |
| Li   | -1.904250 | -1.470243 | 0.151949  | H    | -1.307975 | -4.297854 | 2.079484  |
| N    | -0.336937 | -1.879002 | 1.223499  | H    | -0.356528 | -5.345170 | 1.011557  |
| Li   | 0.023702  | -0.044634 | 0.021905  | H    | -1.588008 | -4.266697 | 0.327871  |
| O    | 1.937212  | 0.002412  | -0.935458 | H    | 1.040154  | -3.438806 | 1.661016  |
| C    | 3.051478  | 0.059134  | -0.011461 | C    | -0.332962 | -1.675119 | 2.680124  |
| C    | 4.311359  | 0.093857  | -0.878408 | C    | -1.404666 | -0.675490 | 3.126741  |
| C    | 3.875639  | -0.724117 | -2.102568 | H    | -1.258839 | 0.300245  | 2.649954  |
| C    | 2.415969  | -0.296308 | -2.267214 | H    | -1.382290 | -0.520484 | 4.213066  |

**Table 1 (continued).**

|   |           |           |           |   |           |           |           |
|---|-----------|-----------|-----------|---|-----------|-----------|-----------|
| H | 2.327547  | 0.607633  | -2.883771 | H | -2.409658 | -1.031852 | 2.862883  |
| H | 1.779764  | -1.073852 | -2.696120 | C | 1.043445  | -1.230583 | 3.229173  |
| H | 4.472169  | -0.522808 | -2.997389 | H | 1.832068  | -1.931995 | 2.933756  |
| H | 3.936390  | -1.796686 | -1.885488 | H | 1.048663  | -1.170851 | 4.326877  |
| H | 4.550863  | 1.123294  | -1.171472 | H | 1.311355  | -0.243640 | 2.831314  |
| H | 5.181985  | -0.323826 | -0.363958 | H | -0.572185 | -2.622209 | 3.201357  |
| H | 3.019242  | -0.832546 | 0.625842  | C | -3.088752 | 0.997500  | -0.744366 |
| H | 2.919149  | 0.943055  | 0.616290  | C | -4.514070 | 0.402510  | -0.866118 |
| O | 0.533347  | 1.911470  | 0.805633  | H | -4.680047 | -0.065430 | -1.842203 |
| C | 0.624702  | 2.553275  | 2.098409  | H | -5.290539 | 1.168621  | -0.730117 |
| C | 1.041869  | 3.999220  | 1.820894  | H | -4.666849 | -0.368949 | -0.096396 |
| C | 0.405735  | 4.255187  | 0.446469  | C | -2.944352 | 1.598084  | 0.658044  |
| C | 0.599648  | 2.905915  | -0.246046 | H | -3.091831 | 0.834575  | 1.431541  |
| H | -0.170929 | 2.664029  | -0.981030 | H | -3.696816 | 2.378452  | 0.829139  |
| H | 1.582995  | 2.837443  | -0.729150 | H | -1.950937 | 2.031508  | 0.803168  |
| H | -0.661551 | 4.479883  | 0.554799  | H | -3.052024 | 1.852986  | -1.448053 |
| H | 0.873507  | 5.077643  | -0.103036 | C | -1.152640 | 0.980795  | -3.227019 |
| H | 0.695842  | 4.687833  | 2.597396  | H | -1.547843 | 1.970952  | -2.971523 |
| H | 2.133776  | 4.079722  | 1.757312  | H | -1.194285 | 0.884196  | -4.321275 |
| H | 1.342965  | 1.999593  | 2.709298  | H | -0.099009 | 0.951393  | -2.922220 |
| H | -0.356735 | 2.503763  | 2.585670  | C | -1.380139 | -1.501148 | -2.913505 |
| C | 0.228801  | -3.212084 | 0.943667  | H | -0.361634 | -1.624260 | -2.529032 |
| C | 0.864046  | -3.317289 | -0.447193 | H | -1.338342 | -1.621800 | -4.003570 |
| H | 0.113681  | -3.198088 | -1.236892 | H | -1.993914 | -2.317879 | -2.509925 |
| H | 1.332200  | -4.299540 | -0.592136 | H | -2.966705 | -0.101901 | -2.960703 |



**Table 1 (continued).**

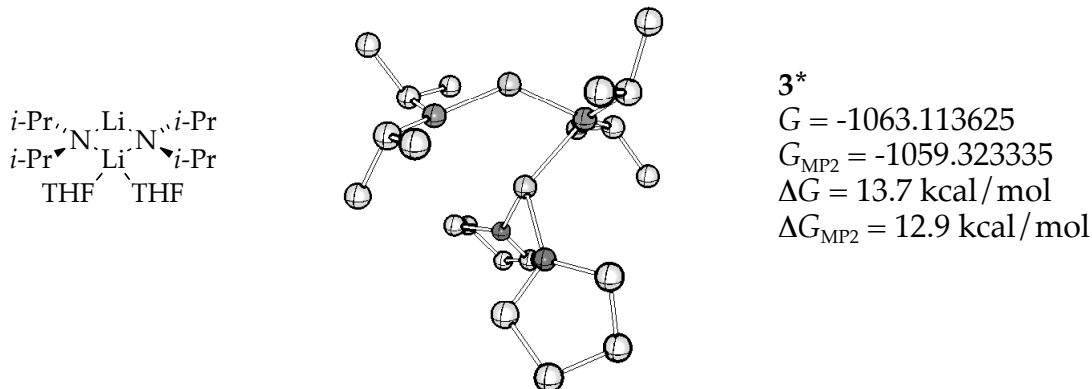

Closed dimer **3\*** connects directly to transition structure **10** and **10a**. It exhibits an elongated N-Li bond length of 2.68 Å.

| Atom | X         | Y         | Z         | Atom | X         | Y         | Z         |
|------|-----------|-----------|-----------|------|-----------|-----------|-----------|
| C    | 3.426237  | -0.427821 | -0.283587 | H    | -2.661415 | 2.227511  | 2.055561  |
| N    | 2.226054  | 0.127897  | -0.915322 | C    | 0.350575  | 0.833835  | 3.114525  |
| Li   | 1.622508  | 1.564067  | 0.162849  | H    | 1.399906  | 1.148709  | 3.125096  |
| N    | -0.120884 | 1.964397  | 0.951106  | H    | 0.021573  | 0.722985  | 4.155878  |
| Li   | -0.308638 | 0.088012  | -0.026578 | H    | 0.302686  | -0.155569 | 2.641993  |
| O    | -0.435677 | -1.839014 | 0.776563  | H    | -0.369744 | 2.810313  | 2.890739  |
| C    | -1.427480 | -2.393495 | 1.670724  | C    | -0.573651 | 3.252629  | 0.397904  |
| C    | -0.770552 | -3.607574 | 2.364697  | C    | 0.193298  | 4.481126  | 0.948483  |
| C    | 0.721078  | -3.459980 | 2.008874  | H    | 1.250494  | 4.434272  | 0.647165  |
| C    | 0.649111  | -2.783968 | 0.644914  | H    | -0.224473 | 5.420037  | 0.560314  |
| H    | 0.409599  | -3.509949 | -0.146342 | H    | 0.163629  | 4.537239  | 2.041060  |
| H    | 1.525170  | -2.211688 | 0.345647  | C    | -0.455869 | 3.277272  | -1.130674 |
| H    | 1.249539  | -4.417625 | 1.980439  | H    | -0.995206 | 2.447081  | -1.594742 |
| H    | 1.231265  | -2.806526 | 2.725127  | H    | -0.848607 | 4.216070  | -1.540265 |
| H    | -1.168115 | -4.543856 | 1.957822  | H    | 0.593485  | 3.205378  | -1.449677 |
| H    | -0.952249 | -3.611655 | 3.443179  | H    | -1.643687 | 3.431267  | 0.629471  |
| H    | -1.706714 | -1.606125 | 2.374813  | C    | 2.159612  | -0.196302 | -2.339912 |
| H    | -2.316943 | -2.678012 | 1.094615  | C    | 1.150637  | 0.694894  | -3.071796 |
| O    | -1.945706 | -0.146384 | -1.199861 | H    | 1.434036  | 1.749754  | -2.993796 |
| C    | -3.115434 | 0.695441  | -1.166654 | H    | 1.097255  | 0.436583  | -4.137536 |
| C    | -4.284619 | -0.280737 | -1.244579 | H    | 0.142190  | 0.585246  | -2.652190 |
| C    | -3.753779 | -1.321543 | -2.247285 | C    | 1.828766  | -1.679860 | -2.638426 |
| C    | -2.235334 | -1.333774 | -1.977165 | H    | 0.815883  | -1.926301 | -2.292731 |
| H    | -1.644960 | -1.309614 | -2.899047 | H    | 1.881039  | -1.893326 | -3.714952 |
| H    | -1.914173 | -2.191116 | -1.379561 | H    | 2.526662  | -2.360345 | -2.137266 |
| H    | -3.957711 | -0.996249 | -3.273208 | H    | 3.128948  | -0.005421 | -2.836253 |
| H    | -4.204737 | -2.309712 | -2.117551 | C    | 3.413416  | -0.137804 | 1.225285  |
| H    | -5.213721 | 0.195143  | -1.572192 | H    | 2.504388  | -0.515331 | 1.704285  |

**Table 1 (continued).**

|   |           |           |           |   |          |           |           |
|---|-----------|-----------|-----------|---|----------|-----------|-----------|
| H | -4.459972 | -0.736800 | -0.263184 | H | 4.276106 | -0.589712 | 1.728883  |
| H | -3.064186 | 1.283288  | -0.249321 | H | 3.475144 | 0.946261  | 1.422098  |
| H | -3.106721 | 1.376591  | -2.029427 | C | 4.770895 | 0.091372  | -0.849943 |
| C | -0.516658 | 1.851211  | 2.362504  | H | 4.824409 | 1.184522  | -0.749851 |
| C | -2.012372 | 1.500443  | 2.557003  | H | 5.620395 | -0.346518 | -0.308723 |
| H | -2.236536 | 0.510462  | 2.137138  | H | 4.902658 | -0.151739 | -1.908484 |
| H | -2.294660 | 1.490013  | 3.618957  | H | 3.474068 | -1.536848 | -0.376266 |

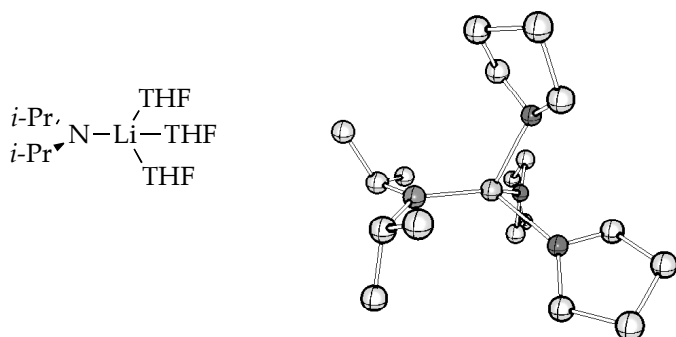

**6**  
 $G = -996.24738$   
 $G_{\text{MP2}} = -992.802383$   
 $\Delta G = 12.2 \text{ kcal/mol}$   
 $\Delta G_{\text{MP2}} = 5.8 \text{ kcal/mol}$

| Atom | X         | Y         | Z         | Atom | X         | Y         | Z         |
|------|-----------|-----------|-----------|------|-----------|-----------|-----------|
| C    | -2.739984 | 0.909518  | -1.265496 | H    | -1.164003 | -0.061722 | 3.517775  |
| N    | -1.657323 | -0.052568 | -1.154433 | H    | -1.896622 | 0.279295  | 1.916956  |
| C    | -1.833533 | -1.127095 | -2.118529 | H    | -2.678094 | -1.975074 | 1.671695  |
| C    | -1.279404 | -0.780699 | -3.525233 | H    | -2.920155 | -1.771196 | 3.423456  |
| H    | -1.500475 | -1.558866 | -4.272078 | H    | -1.314059 | -3.818242 | 2.559507  |
| H    | -1.711966 | 0.159844  | -3.885794 | H    | -0.772838 | -2.826939 | 3.923665  |
| H    | -0.190164 | -0.642603 | -3.483088 | H    | 0.143583  | -2.681738 | 1.022488  |
| C    | -1.204481 | -2.440764 | -1.624950 | H    | 1.081057  | -2.355465 | 2.501384  |
| H    | -1.709997 | -2.788133 | -0.715974 | O    | 1.871871  | -0.709018 | -0.552973 |
| H    | -1.266529 | -3.237106 | -2.379369 | C    | 2.489283  | -1.097627 | -1.787877 |
| H    | -0.142900 | -2.297138 | -1.380678 | C    | 3.558661  | -2.138193 | -1.398840 |
| H    | -2.908210 | -1.358249 | -2.274109 | C    | 3.830863  | -1.844085 | 0.103413  |
| Li   | -0.069969 | 0.062572  | -0.073571 | C    | 2.938360  | -0.626724 | 0.400442  |
| O    | 0.880063  | 1.846911  | 0.485875  | H    | 3.490644  | 0.314030  | 0.252452  |
| C    | 1.460351  | 2.620597  | -0.588337 | H    | 2.490727  | -0.615830 | 1.394391  |
| C    | 1.777282  | 3.998424  | 0.003775  | H    | 4.884658  | -1.633801 | 0.310038  |
| C    | 0.725578  | 4.123070  | 1.117527  | H    | 3.535931  | -2.696723 | 0.722644  |
| C    | 0.645506  | 2.685461  | 1.632607  | H    | 4.456600  | -2.037535 | -2.015796 |
| H    | -0.329595 | 2.424533  | 2.052500  | H    | 3.178441  | -3.154965 | -1.532813 |
| H    | 1.417625  | 2.484515  | 2.388915  | H    | 1.705986  | -1.476784 | -2.444306 |
| H    | -0.239679 | 4.428258  | 0.699122  | H    | 2.948247  | -0.214339 | -2.257791 |
| H    | 1.003569  | 4.835580  | 1.900171  | C    | -4.049821 | 0.450617  | -0.570435 |
| H    | 1.713385  | 4.795602  | -0.742728 | H    | -4.349988 | -0.545010 | -0.916340 |
| H    | 2.787745  | 4.014067  | 0.429880  | H    | -3.902409 | 0.392804  | 0.516912  |
| H    | 2.345055  | 2.090753  | -0.954720 | H    | -4.888193 | 1.136771  | -0.764863 |

**Table 1 (continued).**

|   |           |           |           |   |           |          |           |
|---|-----------|-----------|-----------|---|-----------|----------|-----------|
| H | 0.729062  | 2.679175  | -1.401782 | C | -2.345377 | 2.283546 | -0.706302 |
| O | -0.159110 | -0.817466 | 1.856247  | H | -1.501094 | 2.701072 | -1.266193 |
| C | 0.104092  | -2.232042 | 2.018931  | H | -3.178941 | 2.996739 | -0.756210 |
| C | -1.046965 | -2.801306 | 2.862318  | H | -2.045679 | 2.200196 | 0.348272  |
| C | -2.172958 | -1.783175 | 2.623895  | H | -3.014878 | 1.090871 | -2.328091 |
| C | -1.393665 | -0.476156 | 2.524600  |   |           |          |           |

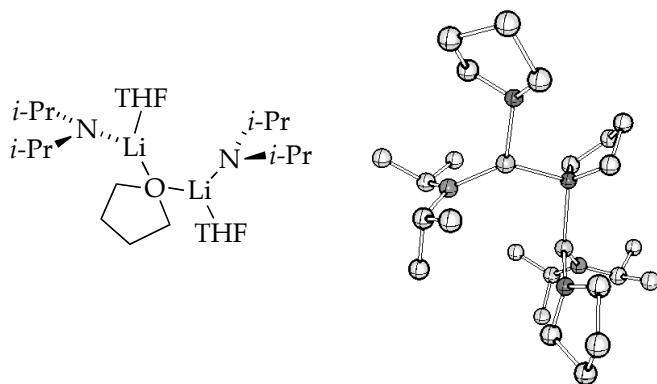

7

$G = -1295.446719$

$G_{\text{MP2}} = -1290.87978$

$\Delta G = 23.9 \text{ kcal/mol}$

$\Delta G_{\text{MP2}} = 21.3 \text{ kcal/mol}$

| Atom | X         | Y         | Z         | Atom | X         | Y         | Z         |
|------|-----------|-----------|-----------|------|-----------|-----------|-----------|
| C    | 2.060864  | 2.473439  | -1.765852 | C    | -2.872929 | 0.960920  | 3.788161  |
| N    | 1.938336  | 1.736632  | -0.518589 | C    | -2.324099 | 1.384782  | 2.427604  |
| Li   | 1.666746  | -0.093941 | -0.328202 | H    | -1.717318 | 2.294926  | 2.495470  |
| O    | 3.237978  | -1.345800 | -0.034622 | H    | -3.082897 | 1.506078  | 1.650810  |
| C    | 3.589374  | -2.136218 | 1.124778  | H    | -3.146158 | 1.818281  | 4.410162  |
| C    | 5.119425  | -2.179862 | 1.164918  | H    | -3.761352 | 0.330992  | 3.663868  |
| C    | 5.497553  | -0.846775 | 0.502354  | H    | -0.938489 | 0.806404  | 4.773116  |
| C    | 4.434981  | -0.712918 | -0.584887 | H    | -2.011643 | -0.554668 | 5.151680  |
| H    | 4.716913  | -1.251370 | -1.498758 | H    | -1.702852 | -1.533320 | 2.958475  |
| H    | 4.155462  | 0.317456  | -0.820885 | H    | -0.101572 | -0.768174 | 3.158069  |
| H    | 6.512432  | -0.841251 | 0.094159  | C    | 0.075689  | -2.586535 | 0.229869  |
| H    | 5.413126  | -0.022341 | 1.219755  | C    | 0.504599  | -3.629904 | -0.793413 |
| H    | 5.493707  | -3.022512 | 0.571943  | C    | -0.270112 | -3.174859 | -2.041317 |
| H    | 5.502936  | -2.285730 | 2.184161  | C    | -0.258102 | -1.646279 | -1.937283 |
| H    | 3.179860  | -1.646274 | 2.018399  | H    | -1.218996 | -1.181162 | -2.180231 |
| H    | 3.133264  | -3.126487 | 1.024322  | H    | 0.550104  | -1.187435 | -2.512525 |
| O    | 0.007401  | -1.337172 | -0.510561 | H    | -1.299604 | -3.547548 | -2.006612 |
| Li   | -1.611807 | -0.069541 | 0.069348  | H    | 0.183595  | -3.522430 | -2.973783 |
| N    | -3.174186 | -0.025054 | -0.966557 | H    | 0.256338  | -4.648356 | -0.479254 |
| C    | -3.527313 | 1.070667  | -1.859809 | H    | 1.585600  | -3.567676 | -0.961834 |
| H    | -4.114750 | 0.710258  | -2.730236 | H    | 0.775197  | -2.441391 | 1.056252  |
| C    | -4.397493 | 2.162424  | -1.187185 | H    | -0.917260 | -2.813430 | 0.638018  |
| H    | -5.274739 | 1.724311  | -0.696746 | C    | 2.016163  | 2.565761  | 0.670624  |

**Table 1 (continued).**

|   |           |           |           |   |           |          |           |
|---|-----------|-----------|-----------|---|-----------|----------|-----------|
| H | -3.814351 | 2.693578  | -0.421969 | H | 2.951685  | 3.165963 | 0.704738  |
| H | -4.759736 | 2.906484  | -1.911496 | C | 0.861805  | 3.585447 | 0.829213  |
| C | -2.265583 | 1.725732  | -2.439141 | H | 0.813339  | 4.274971 | -0.020151 |
| H | -1.709267 | 1.020355  | -3.067548 | H | -0.100355 | 3.058058 | 0.880410  |
| H | -2.505146 | 2.605109  | -3.050741 | H | 0.978314  | 4.192452 | 1.738427  |
| H | -1.593069 | 2.062382  | -1.635816 | C | 2.052008  | 1.668183 | 1.918960  |
| C | -4.274882 | -0.955291 | -0.784461 | H | 2.900785  | 0.972044 | 1.874004  |
| H | -5.244242 | -0.424991 | -0.669011 | H | 2.146006  | 2.252481 | 2.843173  |
| C | -4.093876 | -1.773038 | 0.504024  | H | 1.121142  | 1.084822 | 1.990682  |
| H | -3.150031 | -2.340578 | 0.467930  | H | 1.315564  | 3.292955 | -1.842635 |
| H | -4.060303 | -1.116952 | 1.382144  | C | 1.768897  | 1.540379 | -2.949217 |
| H | -4.902107 | -2.501669 | 0.647883  | H | 1.870267  | 2.056600 | -3.911983 |
| C | -4.471224 | -1.932931 | -1.971481 | H | 2.472434  | 0.692167 | -2.956357 |
| H | -5.376224 | -2.547765 | -1.857816 | H | 0.748359  | 1.146591 | -2.885680 |
| H | -4.556982 | -1.388900 | -2.918618 | C | 3.440043  | 3.144053 | -1.986967 |
| H | -3.608445 | -2.609428 | -2.053606 | H | 3.457615  | 3.727329 | -2.917960 |
| O | -1.454974 | 0.292328  | 2.006830  | H | 3.695376  | 3.826798 | -1.169071 |
| C | -1.179952 | -0.581986 | 3.122820  | H | 4.233699  | 2.386024 | -2.046569 |
| C | -1.707892 | 0.141566  | 4.364230  |   |           |          |           |

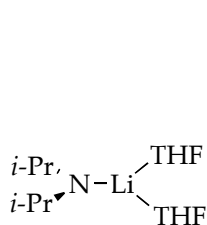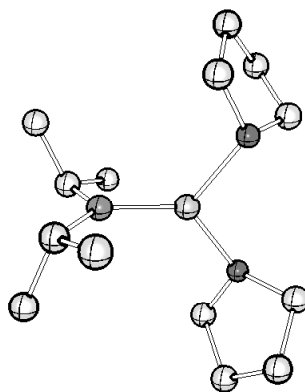

**8**  
 $G = -763.908312$   
 $G_{\text{MP2}} = -761.230838$   
 $\Delta G = 5.5 \text{ kcal/mol}$   
 $\Delta G_{\text{MP2}} = 6.9 \text{ kcal/mol}$

| Atom | X         | Y        | Z         | Atom | X         | Y         | Z         |
|------|-----------|----------|-----------|------|-----------|-----------|-----------|
| C    | -0.620691 | 2.385888 | 1.043481  | H    | -2.159107 | -3.421673 | -0.578605 |
| N    | -0.000631 | 1.591937 | 0.000014  | H    | -1.272626 | -2.846301 | 0.860673  |
| C    | 0.618888  | 2.386186 | -1.043542 | O    | 1.413260  | -1.477861 | 0.659195  |
| C    | 1.958906  | 3.042469 | -0.624112 | C    | 1.991867  | -2.560094 | -0.087797 |
| H    | 2.355466  | 3.708145 | -1.404656 | C    | 3.307953  | -1.991594 | -0.615089 |
| H    | 1.839859  | 3.638157 | 0.287930  | C    | 3.786793  | -1.111163 | 0.560966  |
| H    | 2.712370  | 2.268506 | -0.419421 | C    | 2.490139  | -0.769455 | 1.331869  |
| C    | 0.857626  | 1.520629 | -2.290915 | H    | 2.217027  | 0.288157  | 1.297255  |
| H    | -0.089459 | 1.131338 | -2.684603 | H    | 2.532154  | -1.106389 | 2.374607  |
| H    | 1.358477  | 2.078589 | -3.092423 | H    | 4.299814  | -0.210688 | 0.212422  |

**Table 1 (continued).**

|    |           |           |           |   |           |           |           |
|----|-----------|-----------|-----------|---|-----------|-----------|-----------|
| H  | 1.501093  | 0.660998  | -2.042337 | H | 4.482660  | -1.662153 | 1.202033  |
| H  | -0.035053 | 3.221869  | -1.375085 | H | 3.116481  | -1.379208 | -1.502798 |
| Li | 0.000334  | -0.275582 | 0.000230  | H | 4.026839  | -2.770770 | -0.886072 |
| O  | -1.412130 | -1.478631 | -0.658939 | H | 2.160979  | -3.420565 | 0.577053  |
| C  | -1.990341 | -2.561735 | 0.087030  | H | 1.274211  | -2.844220 | -0.861655 |
| C  | -3.306667 | -1.994177 | 0.614791  | C | -1.961165 | 3.041178  | 0.623983  |
| C  | -3.785699 | -1.112530 | -0.560323 | H | -1.842537 | 3.636894  | -0.288095 |
| C  | -2.489268 | -0.770669 | -1.331575 | H | -2.714076 | 2.266665  | 0.419339  |
| H  | -2.216392 | 0.287008  | -1.297272 | H | -2.358211 | 3.706623  | 1.404479  |
| H  | -2.531435 | -1.107918 | -2.374215 | C | -0.858789 | 1.520300  | 2.290956  |
| H  | -4.482160 | -1.662589 | -1.201538 | H | 0.088586  | 1.131673  | 2.684605  |
| H  | -4.298113 | -0.212135 | -0.210681 | H | -1.359952 | 2.078004  | 3.092448  |
| H  | -4.025346 | -2.773862 | 0.884855  | H | -1.501704 | 0.660225  | 2.042491  |
| H  | -3.115447 | -1.382724 | 1.503193  | H | 0.032667  | 3.222071  | 1.374904  |

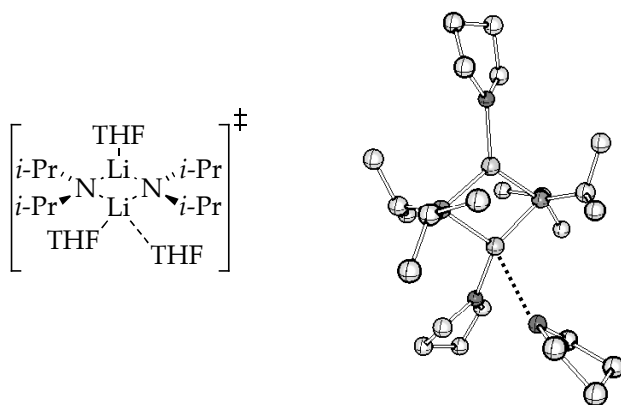

**9**

$G = -1295.468162$

$G_{\text{MP2}} = -1290.908076$

$\Delta G^\ddagger = 10.5 \text{ kcal/mol}$

$\Delta G_{\text{MP2}}^\ddagger = 3.5 \text{ kcal/mol}$

| Atom | X         | Y         | Z         | Atom | X         | Y         | Z         |
|------|-----------|-----------|-----------|------|-----------|-----------|-----------|
| Li   | 0.681480  | 0.174041  | 0.198217  | H    | -6.631217 | 0.059755  | -1.619163 |
| N    | -0.650842 | 1.368723  | -0.958075 | H    | -6.770071 | -0.433149 | 1.065940  |
| C    | -0.938767 | 2.761153  | -0.577105 | H    | -6.161678 | -1.719020 | 0.008376  |
| C    | -0.663346 | 3.032749  | 0.906930  | H    | -4.225903 | -1.499955 | 1.435073  |
| H    | 0.355904  | 2.745297  | 1.183795  | H    | -4.533239 | 0.233211  | 1.709227  |
| H    | -0.797575 | 4.096906  | 1.140974  | C    | -0.544731 | 1.287888  | -2.423535 |
| H    | -1.355590 | 2.471288  | 1.544509  | C    | -0.730664 | -0.144414 | -2.936266 |
| C    | -2.391874 | 3.214364  | -0.873839 | H    | -1.689943 | -0.567886 | -2.609649 |
| H    | -3.096699 | 2.649672  | -0.248082 | H    | -0.710022 | -0.179365 | -4.033299 |
| H    | -2.532809 | 4.283622  | -0.661489 | H    | 0.068692  | -0.797100 | -2.570578 |
| H    | -2.666221 | 3.054004  | -1.922528 | C    | 0.786970  | 1.833965  | -2.996524 |
| H    | -0.287308 | 3.463185  | -1.136671 | H    | 1.628277  | 1.216570  | -2.657203 |
| Li   | -1.724383 | -0.070755 | -0.000344 | H    | 0.782861  | 1.833420  | -4.095957 |
| N    | -0.531551 | -1.302068 | 1.121228  | H    | 0.972584  | 2.864897  | -2.674726 |
| C    | -0.647017 | -1.243656 | 2.585838  | H    | -1.342650 | 1.884192  | -2.908822 |
| C    | 0.628763  | -1.684037 | 3.347349  | O    | 2.869745  | -0.936722 | -1.124503 |

**Table 1 (continued).**

|   |           |           |           |   |          |           |           |
|---|-----------|-----------|-----------|---|----------|-----------|-----------|
| H | 1.449806  | -0.984337 | 3.151559  | C | 3.646135 | -1.609009 | -0.114353 |
| H | 0.459550  | -1.714046 | 4.433175  | C | 4.301360 | -2.806484 | -0.808790 |
| H | 0.962629  | -2.681657 | 3.042535  | C | 4.482928 | -2.279165 | -2.240544 |
| C | -1.039932 | 0.154922  | 3.073005  | C | 3.212464 | -1.444092 | -2.428652 |
| H | -1.991785 | 0.478955  | 2.632228  | H | 2.381898 | -2.058750 | -2.801380 |
| H | -1.154220 | 0.178190  | 4.164337  | H | 3.342521 | -0.594757 | -3.106795 |
| H | -0.278638 | 0.896762  | 2.805154  | H | 4.578523 | -3.072333 | -2.988383 |
| H | -1.449885 | -1.918335 | 2.944964  | H | 5.374728 | -1.643781 | -2.304044 |
| C | -0.559356 | -2.714548 | 0.701516  | H | 3.623949 | -3.668220 | -0.803150 |
| C | -1.961356 | -3.372294 | 0.776530  | H | 5.239433 | -3.107718 | -0.332332 |
| H | -2.642349 | -2.891319 | 0.061205  | H | 4.402336 | -0.913004 | 0.276971  |
| H | -1.916617 | -4.443437 | 0.534001  | H | 2.974543 | -1.888190 | 0.702699  |
| H | -2.402796 | -3.285389 | 1.775919  | O | 2.310950 | 1.198885  | 0.992677  |
| C | -0.022406 | -2.916933 | -0.719466 | C | 2.960308 | 2.126151  | 0.088817  |
| H | 0.953883  | -2.438124 | -0.844310 | C | 3.681185 | 3.129572  | 0.986558  |
| H | 0.080833  | -3.985963 | -0.948159 | C | 4.092236 | 2.247765  | 2.175315  |
| H | -0.704652 | -2.493358 | -1.464754 | C | 2.890901 | 1.305847  | 2.311764  |
| H | 0.092201  | -3.326237 | 1.355116  | H | 2.131583 | 1.710716  | 2.992017  |
| O | -3.695500 | -0.248253 | -0.125193 | H | 3.166313 | 0.305138  | 2.656035  |
| C | -4.582901 | -0.577518 | 0.971529  | H | 4.283356 | 2.811919  | 3.093112  |
| C | -5.980318 | -0.695019 | 0.355576  | H | 4.998851 | 1.680668  | 1.932152  |
| C | -5.891438 | 0.266420  | -0.839975 | H | 2.991284 | 3.916355  | 1.313278  |
| C | -4.459151 | 0.037755  | -1.320048 | H | 4.529780 | 3.605499  | 0.485646  |
| H | -4.006561 | 0.904257  | -1.805901 | H | 3.658247 | 1.564619  | -0.543377 |
| H | -4.395675 | -0.826311 | -1.995116 | H | 2.185844 | 2.562806  | -0.543316 |
| H | -6.022365 | 1.303826  | -0.510155 |   |          |           |           |

**Table 1 (continued).**

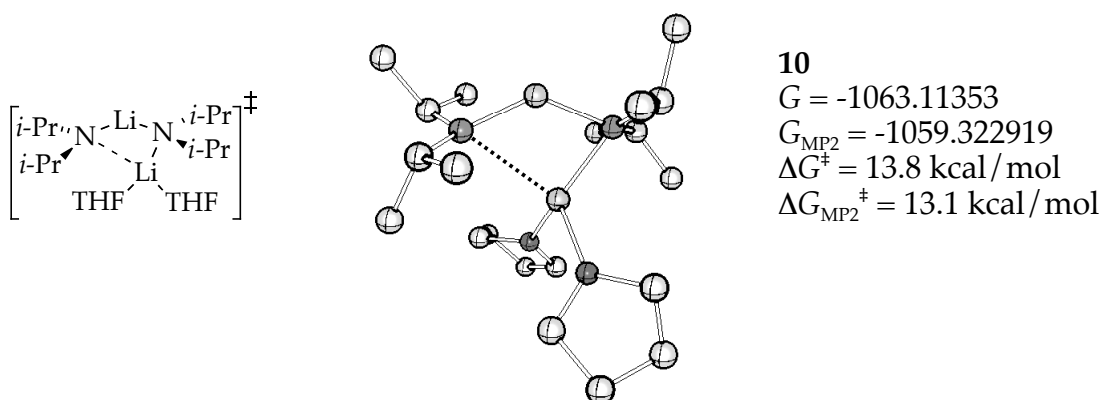

Transition structure **10** connects to disolvated open dimer **4c**.

| Atom | X         | Y         | Z         | Atom | X         | Y         | Z         |
|------|-----------|-----------|-----------|------|-----------|-----------|-----------|
| C    | 3.446563  | -0.423810 | -0.280640 | H    | -2.665936 | 2.229715  | 2.058056  |
| N    | 2.247606  | 0.128915  | -0.915718 | C    | 0.349554  | 0.840271  | 3.112913  |
| Li   | 1.616388  | 1.551906  | 0.160785  | H    | 1.398733  | 1.155763  | 3.119717  |
| N    | -0.130638 | 1.959457  | 0.945956  | H    | 0.023489  | 0.731862  | 4.155437  |
| Li   | -0.345875 | 0.092097  | -0.015986 | H    | 0.301189  | -0.150198 | 2.642720  |
| O    | -0.448614 | -1.831852 | 0.780804  | H    | -0.370224 | 2.816627  | 2.881838  |
| C    | -1.428123 | -2.395050 | 1.683140  | C    | -0.580114 | 3.247231  | 0.388882  |
| C    | -0.754268 | -3.602106 | 2.372894  | C    | 0.198732  | 4.473355  | 0.927604  |
| C    | 0.733578  | -3.437862 | 2.008894  | H    | 1.253275  | 4.418245  | 0.618410  |
| C    | 0.647121  | -2.764097 | 0.644674  | H    | -0.215706 | 5.413285  | 0.538325  |
| H    | 0.411732  | -3.493468 | -0.144622 | H    | 0.177765  | 4.534429  | 2.020174  |
| H    | 1.515524  | -2.182214 | 0.340657  | C    | -0.473836 | 3.262751  | -1.140678 |
| H    | 1.272562  | -4.389543 | 1.978358  | H    | -1.021486 | 2.432959  | -1.595876 |
| H    | 1.240249  | -2.778204 | 2.721934  | H    | -0.864278 | 4.201437  | -1.552746 |
| H    | -1.143765 | -4.542450 | 1.967570  | H    | 0.572572  | 3.182626  | -1.466611 |
| H    | -0.930274 | -3.608585 | 3.452318  | H    | -1.647150 | 3.433114  | 0.628054  |
| H    | -1.709353 | -1.609734 | 2.388899  | C    | 2.179843  | -0.200228 | -2.338395 |
| H    | -2.319206 | -2.688258 | 1.113945  | C    | 1.167526  | 0.686922  | -3.070420 |
| O    | -1.969798 | -0.145738 | -1.197590 | H    | 1.449027  | 1.742545  | -2.995587 |
| C    | -3.145041 | 0.688736  | -1.165455 | H    | 1.111467  | 0.425970  | -4.135382 |
| C    | -4.307908 | -0.294759 | -1.245322 | H    | 0.160324  | 0.576212  | -2.647576 |
| C    | -3.769036 | -1.332298 | -2.247173 | C    | 1.850478  | -1.684993 | -2.633228 |
| C    | -2.251272 | -1.336136 | -1.973725 | H    | 0.836675  | -1.930867 | -2.289332 |
| H    | -1.658676 | -1.310038 | -2.894126 | H    | 1.905126  | -1.901531 | -3.709037 |
| H    | -1.926840 | -2.190580 | -1.373780 | H    | 2.547513  | -2.363777 | -2.128538 |
| H    | -3.972466 | -1.007863 | -3.273467 | H    | 3.147976  | -0.008867 | -2.837275 |
| H    | -4.214682 | -2.323006 | -2.118615 | C    | 3.434129  | -0.120826 | 1.225742  |
| H    | -5.239281 | 0.175554  | -1.574507 | H    | 2.524711  | -0.493758 | 1.708025  |
| H    | -4.482188 | -0.751972 | -0.264266 | H    | 4.296205  | -0.569217 | 1.733548  |

**Table 1 (continued).**

|   |           |          |           |   |          |           |           |
|---|-----------|----------|-----------|---|----------|-----------|-----------|
| H | -3.098885 | 1.276561 | -0.247723 | H | 3.496507 | 0.965015  | 1.412098  |
| H | -3.139229 | 1.370401 | -2.027781 | C | 4.792337 | 0.087357  | -0.851507 |
| C | -0.520374 | 1.854576 | 2.359886  | H | 4.849560 | 1.180918  | -0.758841 |
| C | -2.015580 | 1.506161 | 2.562919  | H | 5.640806 | -0.349924 | -0.308135 |
| H | -2.242463 | 0.512722 | 2.152344  | H | 4.922077 | -0.163469 | -1.908572 |
| H | -2.293703 | 1.504407 | 3.626005  | H | 3.491860 | -1.533894 | -0.363855 |

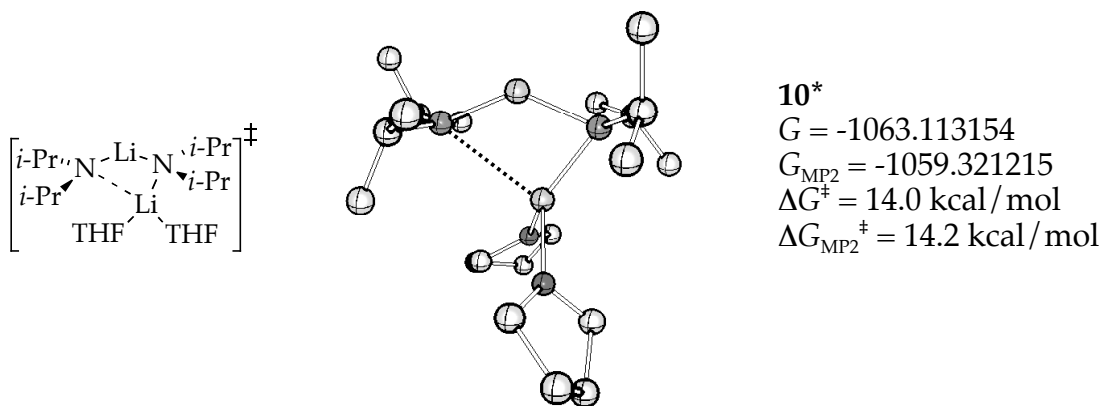

**10\*** is akin to **10** with an activation barrier of 1.1 kcal/mol higher. **10\*** connects to disolvated open dimer **4b**.

| Atom | X         | Y         | Z         | Atom | X         | Y         | Z         |
|------|-----------|-----------|-----------|------|-----------|-----------|-----------|
| C    | -2.114283 | -0.542780 | -2.472623 | H    | 2.288305  | -2.294138 | -0.238505 |
| N    | -2.200964 | -0.293521 | -1.035316 | C    | -0.282290 | -4.291674 | 0.977752  |
| Li   | -1.638272 | -1.556364 | 0.252300  | H    | -0.890476 | -4.324505 | 1.889516  |
| N    | 0.024066  | -1.819164 | 1.300307  | H    | 0.233957  | -5.257738 | 0.884766  |
| Li   | 0.388083  | -0.083821 | 0.240418  | H    | -0.965282 | -4.200001 | 0.119441  |
| O    | 2.072738  | 0.239915  | -0.892168 | H    | 1.428184  | -3.325858 | 1.817244  |
| C    | 3.261165  | 0.603800  | -0.151312 | C    | -0.082042 | -1.666733 | 2.761898  |
| C    | 4.348374  | 0.831190  | -1.202036 | C    | -1.281619 | -0.802666 | 3.166746  |
| C    | 3.948491  | -0.174272 | -2.292622 | H    | -1.231794 | 0.189120  | 2.702926  |
| C    | 2.420294  | -0.099491 | -2.256453 | H    | -1.326207 | -0.659566 | 4.253863  |
| H    | 2.035877  | 0.686941  | -2.917066 | H    | -2.226593 | -1.269035 | 2.856821  |
| H    | 1.930307  | -1.041724 | -2.512055 | C    | 1.206916  | -1.100943 | 3.402358  |
| H    | 4.352575  | 0.071261  | -3.279127 | H    | 2.080060  | -1.698413 | 3.115893  |
| H    | 4.289488  | -1.181344 | -2.026476 | H    | 1.154758  | -1.091156 | 4.500409  |
| H    | 4.301338  | 1.856250  | -1.588800 | H    | 1.382371  | -0.071455 | 3.061788  |
| H    | 5.353639  | 0.663265  | -0.804409 | H    | -0.249800 | -2.653205 | 3.235094  |
| H    | 3.519155  | -0.220532 | 0.526153  | C    | -3.281174 | 0.647639  | -0.736740 |
| H    | 3.024419  | 1.488129  | 0.445189  | C    | -4.700528 | 0.049387  | -0.904190 |
| O    | 0.413563  | 1.897745  | 0.836375  | H    | -4.854287 | -0.369084 | -1.904205 |
| C    | 0.398198  | 2.619552  | 2.090225  | H    | -5.481463 | 0.805705  | -0.740931 |



**Table 1 (continued).**

|   |           |           |           |   |           |           |           |
|---|-----------|-----------|-----------|---|-----------|-----------|-----------|
| C | 0.459327  | 4.101778  | 1.717075  | H | -4.851788 | -0.761377 | -0.177794 |
| C | -0.281521 | 4.120853  | 0.370978  | C | -3.164962 | 1.195338  | 0.690502  |
| C | 0.185116  | 2.813361  | -0.268107 | H | -3.311295 | 0.394958  | 1.427899  |
| H | -0.547405 | 2.350766  | -0.933274 | H | -3.927226 | 1.959798  | 0.888526  |
| H | 1.130614  | 2.942119  | -0.810068 | H | -2.176396 | 1.631489  | 0.864879  |
| H | -1.365189 | 4.102015  | 0.530863  | H | -3.240444 | 1.530761  | -1.409910 |
| H | -0.041695 | 4.993317  | -0.244035 | C | -1.408090 | 0.587957  | -3.260248 |
| H | -0.001326 | 4.739965  | 2.476895  | H | -1.881734 | 1.558209  | -3.070316 |
| H | 1.499505  | 4.424370  | 1.587253  | H | -1.438966 | 0.414754  | -4.345536 |
| H | 1.246394  | 2.280725  | 2.691934  | H | -0.355687 | 0.663269  | -2.956243 |
| H | -0.528199 | 2.378040  | 2.624589  | C | -1.411238 | -1.873215 | -2.764648 |
| C | 0.702231  | -3.098732 | 1.014834  | H | -0.385898 | -1.861259 | -2.373766 |
| C | 1.519298  | -3.072058 | -0.281924 | H | -1.349072 | -2.075484 | -3.841551 |
| H | 0.879417  | -2.871123 | -1.149099 | H | -1.944631 | -2.709598 | -2.293709 |
| H | 2.012532  | -4.036740 | -0.457922 | H | -3.121579 | -0.633572 | -2.922681 |

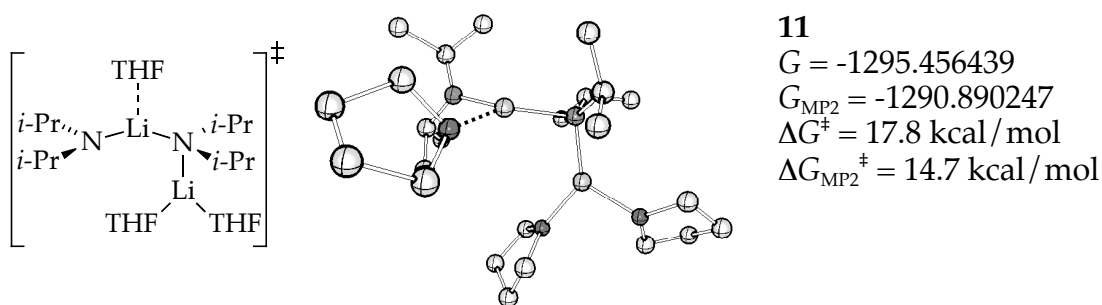

| Atom | X         | Y         | Z         | Atom | X         | Y         | Z         |
|------|-----------|-----------|-----------|------|-----------|-----------|-----------|
| C    | -0.892566 | -2.419404 | -1.171013 | H    | 4.082729  | 1.184968  | -1.847740 |
| N    | -0.661285 | -1.593854 | 0.029333  | C    | 2.346574  | 2.003749  | -0.933718 |
| Li   | -1.814919 | -0.025294 | 0.022911  | H    | 1.262974  | 1.823752  | -0.862909 |
| O    | -3.729470 | 0.035294  | 0.562338  | H    | 2.752197  | 1.946280  | 0.080913  |
| C    | -4.727749 | 0.741847  | -0.207108 | H    | 2.495344  | 3.023821  | -1.315207 |
| C    | -5.932414 | -0.194667 | -0.258306 | C    | 2.520846  | 1.191731  | -3.303075 |
| C    | -5.871909 | -0.856281 | 1.127320  | H    | 2.816626  | 2.184339  | -3.675030 |
| C    | -4.364051 | -1.001906 | 1.363528  | H    | 2.941291  | 0.446233  | -3.986676 |
| H    | -3.978733 | -1.966338 | 1.021414  | H    | 1.426275  | 1.110980  | -3.366576 |
| H    | -4.073704 | -0.856112 | 2.407565  | C    | -0.750886 | -2.356191 | 1.283959  |
| H    | -6.389191 | -1.818975 | 1.167454  | H    | -1.698301 | -2.929760 | 1.339500  |
| H    | -6.320960 | -0.200304 | 1.882042  | C    | 0.378222  | -3.391448 | 1.487088  |
| H    | -5.798705 | -0.942172 | -1.048598 | H    | 0.429639  | -4.101444 | 0.654900  |
| H    | -6.869810 | 0.337804  | -0.444135 | H    | 1.353965  | -2.891741 | 1.561007  |
| H    | -4.973144 | 1.685623  | 0.299059  | H    | 0.228394  | -3.971018 | 2.408242  |

**Table 1 (continued).**

|    |           |           |           |   |           |           |           |
|----|-----------|-----------|-----------|---|-----------|-----------|-----------|
| H  | -4.298662 | 0.970105  | -1.186013 | C | -0.763976 | -1.393273 | 2.482179  |
| O  | -1.589021 | 1.844997  | -0.556654 | H | -1.600147 | -0.680470 | 2.418432  |
| C  | -1.476342 | 2.917015  | 0.410886  | H | -0.877820 | -1.938783 | 3.427914  |
| C  | -1.703213 | 4.202564  | -0.383087 | H | 0.168873  | -0.821274 | 2.527910  |
| C  | -1.086167 | 3.844935  | -1.744583 | H | -0.132781 | -3.219912 | -1.264654 |
| C  | -1.467237 | 2.371316  | -1.905894 | C | -0.747897 | -1.546458 | -2.427117 |
| H  | -0.717068 | 1.782594  | -2.438196 | H | -0.863831 | -2.142970 | -3.340596 |
| H  | -2.437661 | 2.252980  | -2.405557 | H | -1.527143 | -0.766208 | -2.452204 |
| H  | 0.002752  | 3.950036  | -1.708963 | H | 0.232464  | -1.055697 | -2.461154 |
| H  | -1.463874 | 4.461034  | -2.565605 | C | -2.262164 | -3.136624 | -1.227060 |
| H  | -1.233547 | 5.070368  | 0.088934  | H | -2.359090 | -3.718538 | -2.152697 |
| H  | -2.775845 | 4.407225  | -0.484256 | H | -2.408046 | -3.830281 | -0.392011 |
| H  | -2.219145 | 2.740308  | 1.194682  | H | -3.082696 | -2.403348 | -1.204725 |
| H  | -0.473163 | 2.886529  | 0.853010  | O | 2.130157  | 0.351341  | 2.166802  |
| Li | 1.230999  | -0.793283 | -0.235581 | C | 1.976652  | 1.475563  | 3.044284  |
| N  | 2.722385  | -0.381693 | -1.341487 | C | 3.306087  | 1.626723  | 3.796645  |
| C  | 3.590441  | -1.391590 | -1.925789 | C | 4.308659  | 1.044417  | 2.787290  |
| H  | 3.653697  | -1.295202 | -3.032095 | C | 3.503519  | -0.099089 | 2.169231  |
| C  | 5.055745  | -1.343674 | -1.420719 | H | 3.578883  | -1.011831 | 2.779350  |
| H  | 5.489329  | -0.343616 | -1.535680 | H | 3.761520  | -0.327781 | 1.131310  |
| H  | 5.099997  | -1.607279 | -0.355208 | H | 5.240265  | 0.703397  | 3.249435  |
| H  | 5.698771  | -2.046413 | -1.970431 | H | 4.559820  | 1.789356  | 2.022935  |
| C  | 3.028077  | -2.795087 | -1.659973 | H | 3.297539  | 1.026287  | 4.714299  |
| H  | 2.036078  | -2.913361 | -2.110738 | H | 3.514965  | 2.664923  | 4.074283  |
| H  | 3.681524  | -3.579503 | -2.063530 | H | 1.759210  | 2.370434  | 2.441960  |
| H  | 2.932611  | -2.970391 | -0.578165 | H | 1.123748  | 1.293825  | 3.709797  |
| C  | 2.995467  | 0.950668  | -1.845601 |   |           |           |           |

**Table 1 (Continued).**

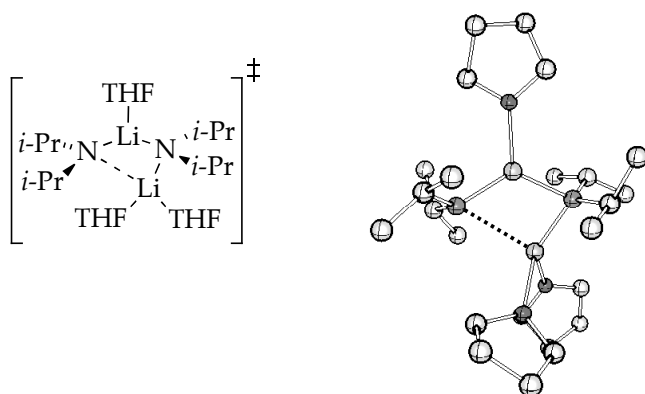

**12**  
 $G = -1295.456449$   
 $G_{\text{MP2}} = -1290.897348$   
 $\Delta G^\ddagger = 17.8 \text{ kcal/mol}$   
 $\Delta G_{\text{MP2}}^\ddagger = 10.3 \text{ kcal/mol}$

| Atom | X         | Y         | Z         | Atom | X         | Y         | Z         |
|------|-----------|-----------|-----------|------|-----------|-----------|-----------|
| C    | 0.636461  | 1.802019  | -2.288673 | C    | 1.392000  | -2.317572 | 2.901757  |
| N    | 0.822011  | 1.650311  | -0.845433 | H    | 2.284188  | -1.691893 | 2.772302  |
| Li   | 1.509939  | -0.037022 | -0.014373 | H    | 1.205622  | -2.416944 | 3.979311  |
| N    | 0.286781  | -1.501106 | 0.742168  | H    | 1.623810  | -3.316002 | 2.517617  |
| Li   | -1.146230 | -0.270797 | -0.032281 | C    | -0.077981 | -0.320020 | 2.884625  |
| O    | -2.510661 | 1.057607  | 0.794776  | H    | -0.890699 | 0.233692  | 2.405983  |
| C    | -2.337956 | 2.465455  | 0.532152  | H    | -0.334522 | -0.458221 | 3.943108  |
| C    | -2.432389 | 3.108190  | 1.912554  | H    | 0.816931  | 0.312346  | 2.839767  |
| C    | -3.519611 | 2.258037  | 2.608278  | H    | -0.692228 | -2.316303 | 2.459782  |
| C    | -3.489760 | 0.913150  | 1.840339  | O    | 3.539508  | -0.424249 | -0.080401 |
| H    | -3.182299 | 0.065610  | 2.458766  | C    | 4.465644  | 0.420610  | -0.807038 |
| H    | -4.466721 | 0.683652  | 1.395180  | C    | 5.845577  | 0.108709  | -0.229752 |
| H    | -3.319955 | 2.124170  | 3.675140  | C    | 5.707807  | -1.380081 | 0.120532  |
| H    | -4.503762 | 2.728962  | 2.513868  | C    | 4.268910  | -1.449874 | 0.635618  |
| H    | -1.472274 | 3.009721  | 2.429465  | H    | 3.779447  | -2.410189 | 0.455585  |
| H    | -2.689185 | 4.170776  | 1.868346  | H    | 4.219378  | -1.228689 | 1.708550  |
| H    | -3.147604 | 2.816828  | -0.128143 | H    | 5.826596  | -1.996423 | -0.778642 |
| H    | -1.372289 | 2.558508  | 0.028097  | H    | 6.432293  | -1.723139 | 0.865379  |
| O    | -2.826029 | -1.121251 | -1.159407 | H    | 6.651578  | 0.317555  | -0.939656 |
| C    | -3.370205 | -2.445604 | -0.949735 | H    | 6.026795  | 0.699619  | 0.676360  |
| C    | -4.859373 | -2.384226 | -1.339020 | H    | 4.149812  | 1.457471  | -0.677231 |
| C    | -5.158347 | -0.876746 | -1.333203 | H    | 4.409965  | 0.168246  | -1.872591 |
| C    | -3.822443 | -0.297125 | -1.791052 | C    | 1.578011  | 2.774401  | -0.291109 |
| H    | -3.714339 | -0.353768 | -2.883831 | C    | 1.976020  | 2.495264  | 1.167560  |
| H    | -3.649180 | 0.730217  | -1.469606 | H    | 2.604451  | 1.599818  | 1.261741  |
| H    | -5.991110 | -0.597334 | -1.985685 | H    | 2.538744  | 3.334121  | 1.596772  |
| H    | -5.387610 | -0.532409 | -0.318163 | H    | 1.079821  | 2.343049  | 1.781508  |
| H    | -5.013832 | -2.797044 | -2.341993 | C    | 0.875046  | 4.159259  | -0.322210 |
| H    | -5.488963 | -2.950056 | -0.645975 | H    | 0.035927  | 4.191469  | 0.384163  |
| H    | -3.223505 | -2.695854 | 0.105007  | H    | 1.574962  | 4.957822  | -0.038812 |
| H    | -2.809624 | -3.164728 | -1.555670 | H    | 0.487522  | 4.405706  | -1.316147 |
| C    | 0.657291  | -2.754042 | 0.069113  | H    | 2.533919  | 2.936276  | -0.843762 |

**Table 1 (Continued).**

|   |           |           |           |   |           |           |           |
|---|-----------|-----------|-----------|---|-----------|-----------|-----------|
| C | -0.228490 | -3.982087 | 0.385700  | C | -0.555892 | 0.969153  | -2.774494 |
| H | -1.269985 | -3.797777 | 0.102697  | H | -1.479919 | 1.305108  | -2.290136 |
| H | 0.122300  | -4.863948 | -0.166914 | H | -0.697773 | 1.050809  | -3.860567 |
| H | -0.216642 | -4.238917 | 1.449715  | H | -0.412035 | -0.094191 | -2.545512 |
| C | 0.690582  | -2.553474 | -1.453263 | C | 1.880444  | 1.442510  | -3.140188 |
| H | 1.362710  | -1.735653 | -1.742380 | H | 2.121643  | 0.375543  | -3.036146 |
| H | 1.043009  | -3.459209 | -1.963223 | H | 1.720468  | 1.649978  | -4.208251 |
| H | -0.308431 | -2.317014 | -1.841562 | H | 2.756911  | 2.019299  | -2.824130 |
| H | 1.685699  | -3.068606 | 0.349498  | H | 0.391623  | 2.848661  | -2.556343 |
| C | 0.174180  | -1.670666 | 2.199914  |   |           |           |           |

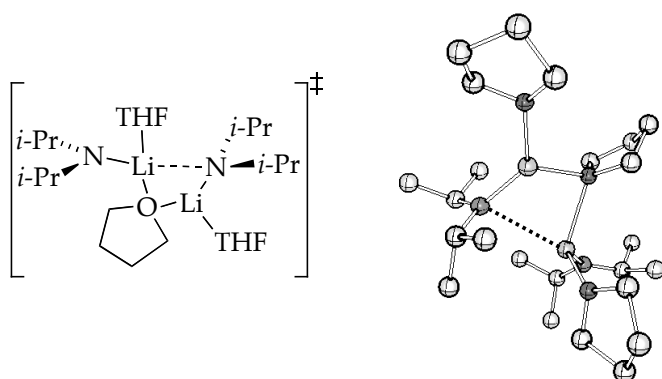

**13**  
 $G = -1295.443878$   
 $G_{\text{MP2}} = -1290.879859$   
 $\Delta G^\ddagger = 25.7 \text{ kcal/mol}$   
 $\Delta G_{\text{MP2}}^\ddagger = 21.2 \text{ kcal/mol}$

**13** connects to trisolvated open dimer **5a** and **7**.

| Atom | X         | Y         | Z         | Atom | X         | Y         | Z         |
|------|-----------|-----------|-----------|------|-----------|-----------|-----------|
| C    | 1.323554  | 2.622040  | -1.440307 | C    | -3.012289 | -0.033052 | 3.811668  |
| N    | 1.335446  | 1.768721  | -0.254470 | C    | -2.491226 | 0.754934  | 2.609980  |
| Li   | 1.732490  | -0.056325 | -0.368838 | H    | -2.054362 | 1.714114  | 2.912435  |
| O    | 3.543874  | -0.882754 | -0.243906 | H    | -3.229163 | 0.922319  | 1.822343  |
| C    | 4.062073  | -1.902955 | 0.641902  | H    | -3.427126 | 0.618789  | 4.586220  |
| C    | 5.572265  | -1.663028 | 0.730819  | H    | -3.794879 | -0.735034 | 3.501547  |
| C    | 5.676126  | -0.149143 | 0.487613  | H    | -1.106800 | -0.141595 | 4.859219  |
| C    | 4.592355  | 0.078021  | -0.562663 | H    | -1.981233 | -1.685767 | 4.863315  |
| H    | 4.958868  | -0.133474 | -1.575284 | H    | -1.492323 | -2.077211 | 2.520885  |
| H    | 4.130293  | 1.067240  | -0.539900 | H    | -0.005613 | -1.208559 | 2.993359  |
| H    | 6.664578  | 0.164337  | 0.139710  | C    | 0.488202  | -2.757957 | -0.013584 |
| H    | 5.443362  | 0.405901  | 1.403717  | C    | 0.731434  | -3.767642 | -1.130455 |
| H    | 6.094360  | -2.213674 | -0.060215 | C    | -0.167780 | -3.214308 | -2.247300 |
| H    | 5.985395  | -1.979227 | 1.693118  | C    | -0.028934 | -1.699086 | -2.088230 |
| H    | 3.579212  | -1.789143 | 1.621524  | H    | -0.955520 | -1.140680 | -2.261225 |
| H    | 3.804052  | -2.885023 | 0.232957  | H    | 0.780918  | -1.294252 | -2.703052 |
| O    | 0.343476  | -1.476376 | -0.676978 | H    | -1.206550 | -3.521568 | -2.086704 |
| Li   | -1.293114 | 0.191871  | -0.001682 | H    | 0.132838  | -3.548313 | -3.244556 |
| N    | -2.923400 | 0.103986  | -0.998597 | H    | 0.473582  | -4.788342 | -0.831721 |

**Table 1 (Continued).**

|   |           |           |           |   |           |           |           |
|---|-----------|-----------|-----------|---|-----------|-----------|-----------|
| C | -3.492009 | 1.285101  | -1.641593 | H | 1.784568  | -3.753485 | -1.436961 |
| H | -4.131638 | 1.004834  | -2.503402 | H | 1.309129  | -2.674586 | 0.703880  |
| C | -4.400008 | 2.121808  | -0.703619 | H | -0.436467 | -2.980388 | 0.530738  |
| H | -5.160785 | 1.492494  | -0.226038 | C | 1.488262  | 2.500248  | 0.995318  |
| H | -3.799264 | 2.587984  | 0.089807  | H | 2.394529  | 3.141252  | 0.986715  |
| H | -4.925333 | 2.924292  | -1.242310 | C | 0.314420  | 3.447140  | 1.336509  |
| C | -2.391519 | 2.188224  | -2.208780 | H | 0.158350  | 4.192408  | 0.548721  |
| H | -1.832506 | 1.671576  | -2.996512 | H | -0.618245 | 2.877053  | 1.437949  |
| H | -2.800644 | 3.116303  | -2.630021 | H | 0.491423  | 3.991789  | 2.274818  |
| H | -1.678546 | 2.470267  | -1.422054 | C | 1.694764  | 1.511463  | 2.153077  |
| C | -3.894920 | -0.978674 | -0.970880 | H | 2.573486  | 0.875803  | 1.968793  |
| H | -4.908306 | -0.607225 | -0.702797 | H | 1.856357  | 2.029398  | 3.107140  |
| C | -3.547424 | -2.023948 | 0.099388  | H | 0.812450  | 0.869177  | 2.262069  |
| H | -2.544185 | -2.437859 | -0.079332 | H | 0.422601  | 3.268166  | -1.479917 |
| H | -3.550460 | -1.576807 | 1.099142  | C | 1.264443  | 1.743099  | -2.696782 |
| H | -4.254588 | -2.863774 | 0.094268  | H | 1.193402  | 2.344081  | -3.611540 |
| C | -4.072361 | -1.703423 | -2.331460 | H | 2.172654  | 1.123886  | -2.780027 |
| H | -4.894361 | -2.434254 | -2.305038 | H | 0.392426  | 1.082651  | -2.665794 |
| H | -4.290364 | -0.990590 | -3.134022 | C | 2.524745  | 3.589064  | -1.579468 |
| H | -3.152337 | -2.237295 | -2.606238 | H | 2.452718  | 4.164915  | -2.511441 |
| O | -1.431897 | -0.061762 | 2.035417  | H | 2.576958  | 4.309467  | -0.756517 |
| C | -1.096785 | -1.138797 | 2.931537  | H | 3.474113  | 3.034828  | -1.597653 |
| C | -1.758571 | -0.795071 | 4.267754  |   |           |           |           |

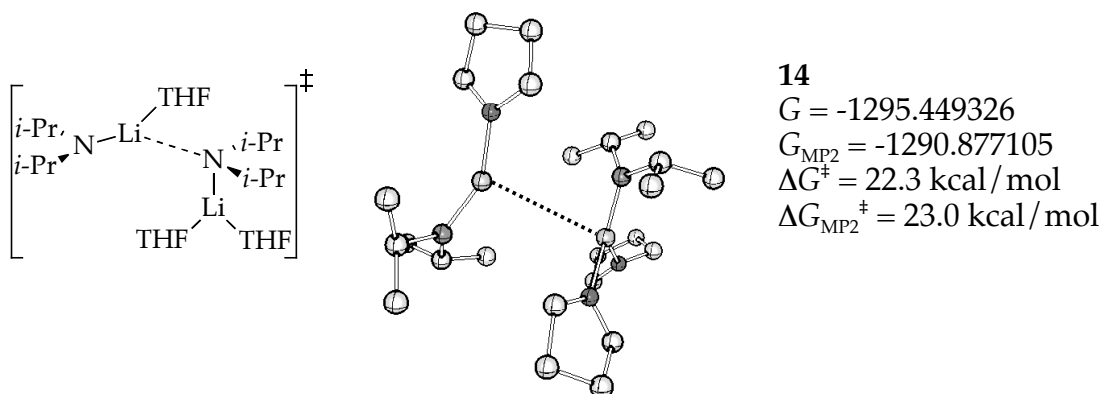

| Atom | X        | Y         | Z         | Atom | X         | Y         | Z         |
|------|----------|-----------|-----------|------|-----------|-----------|-----------|
| C    | 1.998047 | -2.440567 | 1.794156  | H    | -5.307965 | -0.331767 | 0.325113  |
| N    | 2.597024 | -1.667569 | 0.720492  | H    | -4.239966 | 1.092047  | 0.139970  |
| Li   | 2.253942 | 0.099387  | 0.331597  | C    | -1.083484 | 2.749563  | 0.267657  |
| O    | 2.798805 | 1.907549  | 0.160525  | C    | -2.286546 | 3.702730  | 0.500577  |
| C    | 3.596110 | 2.622805  | 1.137194  | H    | -3.181195 | 3.138427  | 0.797732  |
| C    | 4.004805 | 3.927200  | 0.451212  | H    | -2.067548 | 4.436533  | 1.290003  |
| C    | 2.814595 | 4.186622  | -0.486461 | H    | -2.532406 | 4.264777  | -0.405909 |

**Table 1 (continued).**

|    |           |           |           |   |           |           |           |
|----|-----------|-----------|-----------|---|-----------|-----------|-----------|
| C  | 2.459154  | 2.777163  | -0.955734 | C | -0.703776 | 2.106274  | 1.610442  |
| H  | 1.400680  | 2.626251  | -1.174614 | H | 0.210430  | 1.508748  | 1.508255  |
| H  | 3.062815  | 2.473831  | -1.820858 | H | -0.536428 | 2.856716  | 2.393657  |
| H  | 1.974986  | 4.622928  | 0.066035  | H | -1.502502 | 1.436699  | 1.958447  |
| H  | 3.058061  | 4.851435  | -1.320296 | H | -0.242736 | 3.436500  | 0.004067  |
| H  | 4.176077  | 4.735048  | 1.168690  | C | -1.356089 | 2.250631  | -2.097705 |
| H  | 4.925151  | 3.783779  | -0.126933 | C | -0.610623 | 1.347453  | -3.101344 |
| H  | 4.438994  | 1.986329  | 1.420906  | H | -1.030563 | 0.332678  | -3.075100 |
| H  | 2.974619  | 2.806838  | 2.022167  | H | -0.696806 | 1.715443  | -4.132732 |
| N  | -1.245827 | 1.724573  | -0.743670 | H | 0.453204  | 1.268715  | -2.849725 |
| Li | -1.718222 | -0.075010 | -0.386750 | C | -2.812049 | 2.416777  | -2.609699 |
| O  | -1.343436 | -1.812615 | -1.241548 | H | -3.406367 | 3.045259  | -1.940900 |
| C  | -2.388815 | -2.767475 | -1.539990 | H | -2.850910 | 2.859948  | -3.615897 |
| C  | -1.776508 | -3.762833 | -2.528083 | H | -3.301501 | 1.432983  | -2.660008 |
| C  | -0.293922 | -3.742903 | -2.126949 | H | -0.883428 | 3.254537  | -2.162195 |
| C  | -0.073274 | -2.269730 | -1.792301 | C | 3.779414  | -2.292483 | 0.146704  |
| H  | 0.709032  | -2.091370 | -1.046473 | C | 4.584309  | -1.257681 | -0.655042 |
| H  | 0.140518  | -1.680431 | -2.692647 | H | 4.923837  | -0.438645 | -0.007548 |
| H  | -0.123837 | -4.365250 | -1.240745 | H | 5.467294  | -1.702042 | -1.131043 |
| H  | 0.373953  | -4.092912 | -2.919160 | H | 3.964659  | -0.828124 | -1.458429 |
| H  | -2.236843 | -4.753100 | -2.456690 | C | 3.475723  | -3.505478 | -0.766721 |
| H  | -1.898301 | -3.404771 | -3.557259 | H | 2.940900  | -3.179989 | -1.669081 |
| H  | -3.251434 | -2.226191 | -1.940535 | H | 4.395678  | -4.016968 | -1.083558 |
| H  | -2.688886 | -3.259844 | -0.606650 | H | 2.849787  | -4.243697 | -0.252317 |
| O  | -3.293908 | -0.617086 | 0.735168  | H | 4.466308  | -2.668062 | 0.933125  |
| C  | -4.463548 | 0.222651  | 0.760167  | C | 0.581794  | -1.921058 | 2.086352  |
| C  | -4.708315 | 0.542008  | 2.247373  | H | -0.054602 | -2.002832 | 1.196914  |
| C  | -3.935206 | -0.572849 | 3.006501  | H | 0.107715  | -2.475530 | 2.907521  |
| C  | -3.390356 | -1.472232 | 1.884782  | H | 0.616481  | -0.862253 | 2.384633  |
| H  | -2.396985 | -1.882114 | 2.076383  | C | 2.812960  | -2.427484 | 3.111071  |
| H  | -4.082621 | -2.298466 | 1.663307  | H | 2.856045  | -1.407383 | 3.516514  |
| H  | -3.111371 | -0.144585 | 3.584534  | H | 2.368762  | -3.083373 | 3.873731  |
| H  | -4.571267 | -1.133158 | 3.698051  | H | 3.842666  | -2.764098 | 2.947767  |
| H  | -4.311158 | 1.528683  | 2.500369  | H | 1.882263  | -3.510708 | 1.517365  |
| H  | -5.776931 | 0.542976  | 2.481639  |   |           |           |           |

Table 1 (continued).

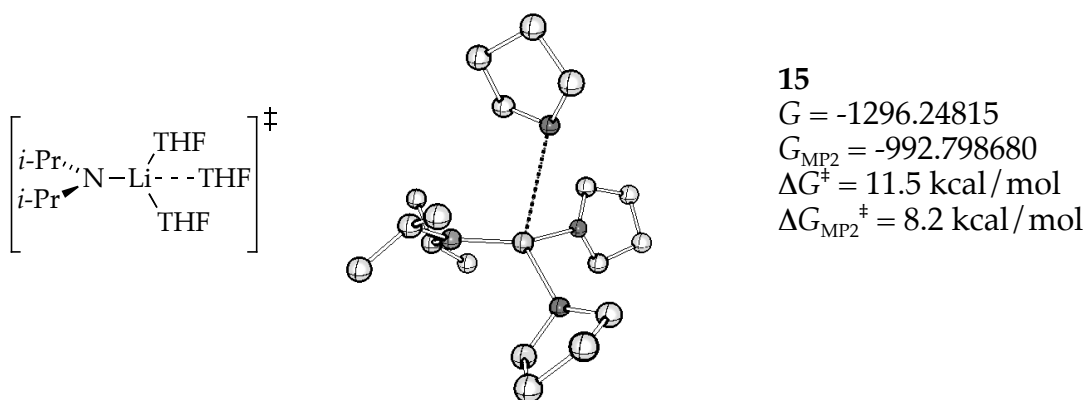

**15**  
 $G = -1296.24815$   
 $G_{\text{MP2}} = -992.798680$   
 $\Delta G^\ddagger = 11.5 \text{ kcal/mol}$   
 $\Delta G_{\text{MP2}}^\ddagger = 8.2 \text{ kcal/mol}$

| Atom | X         | Y         | Z         | Atom | X         | Y         | Z         |
|------|-----------|-----------|-----------|------|-----------|-----------|-----------|
| C    | -0.151278 | -1.488130 | 2.681120  | H    | 3.534626  | 0.770454  | 0.435262  |
| N    | -0.164812 | -1.467352 | 1.228815  | H    | 2.341117  | -0.557186 | 0.535425  |
| C    | 0.289774  | -2.702771 | 0.617291  | H    | 3.556732  | -1.859054 | -1.133666 |
| C    | -0.554367 | -3.958282 | 0.954354  | H    | 4.926531  | -1.075433 | -0.323320 |
| H    | -0.157509 | -4.852688 | 0.453927  | H    | 4.609788  | -0.661881 | -3.012863 |
| H    | -0.569410 | -4.166906 | 2.029467  | H    | 4.967456  | 0.732112  | -1.979283 |
| H    | -1.594842 | -3.815643 | 0.630561  | H    | 2.254370  | -0.132925 | -3.084187 |
| C    | 0.323031  | -2.542990 | -0.911898 | H    | 2.881816  | 1.518747  | -2.882406 |
| H    | 0.907172  | -1.660955 | -1.201427 | O    | -2.248196 | 0.188575  | -0.846609 |
| H    | 0.759633  | -3.422584 | -1.402999 | C    | -3.234348 | -0.822364 | -0.532791 |
| H    | -0.694912 | -2.416193 | -1.305210 | C    | -3.575297 | -1.523313 | -1.869268 |
| H    | 1.332811  | -2.964970 | 0.914553  | C    | -2.810512 | -0.703413 | -2.939124 |
| Li   | -0.558478 | 0.108232  | 0.258241  | C    | -2.469075 | 0.594479  | -2.202232 |
| O    | -0.419617 | 2.091348  | 0.531713  | H    | -3.303905 | 1.311694  | -2.244023 |
| C    | -1.528275 | 2.884759  | 0.977565  | H    | -1.559794 | 1.089559  | -2.552220 |
| C    | -1.155259 | 4.308241  | 0.559893  | H    | -3.399667 | -0.527226 | -3.844342 |
| C    | 0.382221  | 4.333202  | 0.751116  | H    | -1.888303 | -1.216883 | -3.227861 |
| C    | 0.778601  | 2.837743  | 0.830021  | H    | -4.654711 | -1.508309 | -2.050148 |
| H    | 1.123496  | 2.569130  | 1.837427  | H    | -3.255768 | -2.568918 | -1.866618 |
| H    | 1.524773  | 2.524932  | 0.099640  | H    | -2.768500 | -1.466245 | 0.217071  |
| H    | 0.661562  | 4.855185  | 1.671561  | H    | -4.117147 | -0.330150 | -0.102241 |
| H    | 0.880672  | 4.842997  | -0.078311 | C    | 1.263601  | -1.519934 | 3.312832  |
| H    | -1.671536 | 5.068479  | 1.153794  | H    | 1.849168  | -2.368466 | 2.940322  |
| H    | -1.415432 | 4.466219  | -0.492012 | H    | 1.812534  | -0.600820 | 3.063866  |
| H    | -2.424665 | 2.485055  | 0.501138  | H    | 1.220519  | -1.606365 | 4.408092  |
| H    | -1.631164 | 2.797571  | 2.069851  | C    | -0.910680 | -0.270606 | 3.230384  |
| O    | 2.194327  | 0.607162  | -1.151787 | H    | -1.945986 | -0.265476 | 2.865314  |
| C    | 2.848085  | 0.520148  | -2.429637 | H    | -0.934774 | -0.264849 | 4.327737  |
| C    | 4.242371  | -0.068381 | -2.169853 | H    | -0.428900 | 0.662616  | 2.904118  |
| C    | 4.010089  | -0.891063 | -0.892353 | H    | -0.680027 | -2.374855 | 3.090282  |
| C    | 3.012848  | -0.013937 | -0.135625 |      |           |           |           |

Table 1 (continued).

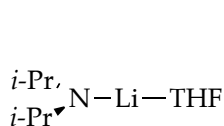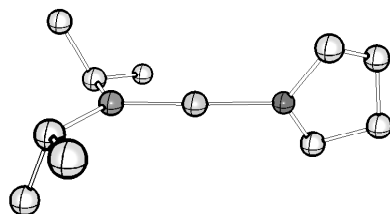

**22**

$$G = -531.551232$$

$$G_{\text{MP2}} = -529.642356$$

$$\Delta G = 10.4 \text{ kcal/mol}$$

$$\Delta G_{\text{MP2}} = 18.5 \text{ kcal/mol}$$

| Atom | X         | Y         | Z         | Atom | X         | Y         | Z         |
|------|-----------|-----------|-----------|------|-----------|-----------|-----------|
| C    | -2.542016 | -1.124853 | 0.250648  | H    | 2.348220  | 0.847909  | 1.782018  |
| N    | -1.666846 | 0.004061  | 0.002239  | H    | 2.953005  | -0.829438 | 1.799181  |
| C    | -2.347484 | 1.254768  | -0.269229 | H    | 4.171030  | 1.585096  | 0.352865  |
| C    | -3.002258 | 1.892262  | 0.979568  | H    | 5.025029  | 0.361788  | 1.312920  |
| H    | -3.563807 | 2.803268  | 0.727864  | H    | 4.984644  | 0.062548  | -1.400140 |
| H    | -3.699608 | 1.197636  | 1.460887  | H    | 4.637452  | -1.356151 | -0.396787 |
| H    | -2.230547 | 2.152542  | 1.716673  | H    | 2.572887  | -1.309176 | -1.639343 |
| C    | -1.354616 | 2.254059  | -0.882670 | H    | 2.633325  | 0.462262  | -1.824460 |
| H    | -0.942280 | 1.862185  | -1.821529 | C    | -3.253018 | -1.653647 | -1.017922 |
| H    | -1.817755 | 3.226836  | -1.089789 | H    | -3.822425 | -0.860096 | -1.514469 |
| H    | -0.519867 | 2.436123  | -0.185054 | H    | -2.510845 | -2.028944 | -1.735526 |
| H    | -3.159095 | 1.129283  | -1.016311 | H    | -3.954099 | -2.467622 | -0.784649 |
| Li   | 0.132813  | -0.150494 | 0.030515  | C    | -1.733812 | -2.265670 | 0.887470  |
| O    | 2.027530  | -0.218284 | 0.039331  | H    | -1.294202 | -1.943228 | 1.840256  |
| C    | 2.852175  | -0.372488 | -1.148827 | H    | -2.347080 | -3.155729 | 1.075181  |
| C    | 4.299749  | -0.345252 | -0.651568 | H    | -0.916615 | -2.574689 | 0.213877  |
| C    | 4.198913  | 0.521169  | 0.614276  | H    | -3.344540 | -0.873878 | 0.975655  |
| C    | 2.856769  | 0.079785  | 1.193057  |      |           |           |           |



**Table 1 (continued).**

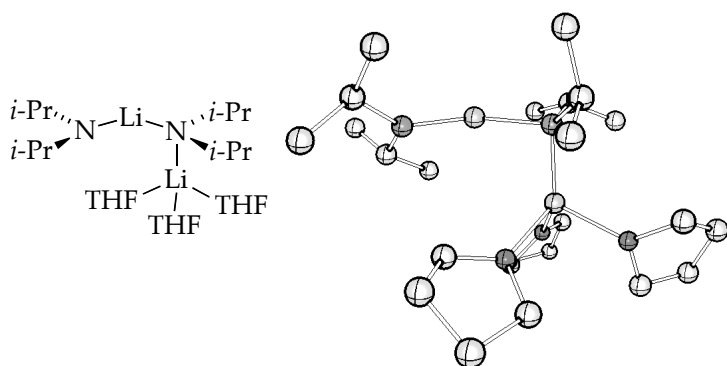

**16a**  
 $G = -1295.463164$   
 $G_{\text{MP2}} = -1290.903012$   
 $\Delta G = 13.6 \text{ kcal/mol}$   
 $\Delta G_{\text{MP2}} = 6.7 \text{ kcal/mol}$   
 (connects to 17 and 19)

| Atom | X         | Y         | Z         | Atom | X         | Y         | Z         |
|------|-----------|-----------|-----------|------|-----------|-----------|-----------|
| C    | -0.419882 | -1.357612 | -2.656833 | C    | -0.059261 | -2.879802 | -0.796816 |
| N    | 0.007859  | -1.480905 | -1.252086 | H    | -1.049885 | -3.328115 | -1.027954 |
| Li   | -0.967793 | -0.190969 | 0.041045  | C    | 0.979294  | -3.826638 | -1.446847 |
| O    | -1.559414 | 1.812365  | -0.416194 | H    | 0.922741  | -3.812112 | -2.540247 |
| C    | -1.141011 | 2.944334  | 0.385608  | H    | 1.998910  | -3.541124 | -1.160078 |
| C    | -1.474608 | 4.183768  | -0.443846 | H    | 0.820464  | -4.865587 | -1.127027 |
| C    | -2.727135 | 3.728762  | -1.206616 | C    | 0.104037  | -2.956400 | 0.728523  |
| C    | -2.397716 | 2.264841  | -1.506760 | H    | -0.699382 | -2.423937 | 1.250158  |
| H    | -1.840935 | 2.160477  | -2.444436 | H    | 0.099280  | -3.996670 | 1.076909  |
| H    | -3.278316 | 1.616817  | -1.553279 | H    | 1.055051  | -2.504025 | 1.038087  |
| H    | -2.917147 | 4.305602  | -2.116445 | Li   | 1.858727  | -0.720368 | -1.047479 |
| H    | -3.614625 | 3.804434  | -0.566181 | N    | 3.423937  | 0.163316  | -0.519878 |
| H    | -0.659023 | 4.402150  | -1.142407 | C    | 3.618687  | 1.599841  | -0.603587 |
| H    | -1.640044 | 5.069742  | 0.176386  | H    | 3.742152  | 2.068218  | 0.402678  |
| H    | -1.697281 | 2.928862  | 1.332618  | C    | 4.848973  | 2.061099  | -1.422632 |
| H    | -0.077660 | 2.836723  | 0.601595  | H    | 5.792803  | 1.734606  | -0.973617 |
| O    | -2.890402 | -0.757288 | 0.689826  | H    | 4.800131  | 1.647460  | -2.438844 |
| C    | -3.914984 | 0.110914  | 1.192887  | H    | 4.885056  | 3.156880  | -1.494674 |
| C    | -5.208307 | -0.308479 | 0.465178  | C    | 2.372052  | 2.251968  | -1.219636 |
| C    | -4.908229 | -1.754234 | -0.019802 | H    | 1.460703  | 1.923785  | -0.703138 |
| C    | -3.511426 | -2.046315 | 0.550448  | H    | 2.418819  | 3.348003  | -1.165007 |
| H    | -2.874646 | -2.649366 | -0.095693 | H    | 2.273969  | 1.970135  | -2.275935 |
| H    | -3.575822 | -2.523969 | 1.539973  | C    | 4.587156  | -0.559568 | -0.027275 |
| H    | -4.888086 | -1.798681 | -1.112277 | H    | 5.491823  | -0.339819 | -0.629738 |
| H    | -5.647873 | -2.479731 | 0.331040  | C    | 4.363554  | -2.070990 | -0.164548 |
| H    | -5.412606 | 0.350831  | -0.383645 | H    | 3.506387  | -2.395333 | 0.443765  |
| H    | -6.072937 | -0.260918 | 1.133824  | H    | 4.164101  | -2.338407 | -1.210325 |
| H    | -4.010678 | -0.032926 | 2.279677  | H    | 5.237862  | -2.643639 | 0.170284  |
| H    | -3.595194 | 1.134769  | 0.997107  | C    | 4.972857  | -0.241624 | 1.438969  |
| O    | -0.155676 | 0.315433  | 1.889374  | H    | 5.894119  | -0.762144 | 1.735619  |
| C    | -0.869759 | 0.042791  | 3.116779  | H    | 5.139708  | 0.831478  | 1.588470  |
| C    | 0.166948  | 0.084692  | 4.256045  | H    | 4.171736  | -0.554422 | 2.122444  |
| C    | 1.507981  | -0.023285 | 3.511494  | H    | -0.016907 | -2.186153 | -3.266887 |

**Table 1 (continued).**

|   |           |           |          |   |           |           |           |
|---|-----------|-----------|----------|---|-----------|-----------|-----------|
| C | 1.204652  | 0.708800  | 2.210500 | C | 0.142651  | -0.071344 | -3.278706 |
| H | 1.855632  | 0.437406  | 1.369327 | H | -0.242396 | 0.090300  | -4.293676 |
| H | 1.237559  | 1.799163  | 2.357789 | H | -0.119899 | 0.803379  | -2.671212 |
| H | 1.756358  | -1.069722 | 3.301497 | H | 1.237996  | -0.106701 | -3.346887 |
| H | 2.342259  | 0.422597  | 4.060327 | C | -1.953399 | -1.408592 | -2.857409 |
| H | 0.010769  | -0.717561 | 4.983516 | H | -2.224013 | -1.379207 | -3.921940 |
| H | 0.107645  | 1.037628  | 4.794107 | H | -2.375769 | -2.330171 | -2.440197 |
| H | -1.661041 | 0.791212  | 3.249780 | H | -2.442392 | -0.560919 | -2.359821 |
| H | -1.339677 | -0.939813 | 3.012890 |   |           |           |           |

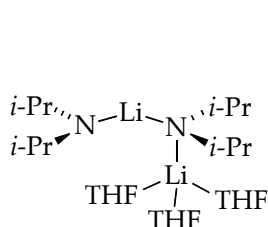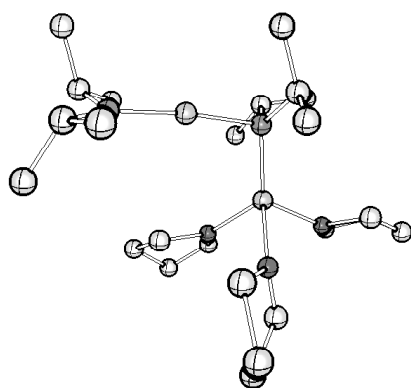

**16b**

$G = -1295.461765$   
 $G_{\text{MP2}} = -1290.900028$   
 $\Delta G = 14.5 \text{ kcal/mol}$   
 $\Delta G_{\text{MP2}} = 8.6 \text{ kcal/mol}$   
 (conformer of **16a**)

| Atom | X         | Y         | Z         | Atom | X         | Y         | Z         |
|------|-----------|-----------|-----------|------|-----------|-----------|-----------|
| C    | 0.058653  | -2.840247 | 0.529819  | C    | 0.226125  | -2.335610 | -1.853985 |
| N    | 0.048315  | -1.783627 | -0.500335 | H    | 1.176172  | -2.901727 | -1.932187 |
| Li   | 1.071773  | -0.102961 | 0.012533  | C    | -0.885013 | -3.314988 | -2.303392 |
| O    | 0.420576  | 1.090912  | 1.603882  | H    | -0.966133 | -4.178688 | -1.634682 |
| C    | -0.790472 | 1.889266  | 1.457377  | H    | -1.865642 | -2.816995 | -2.319954 |
| C    | -1.192580 | 2.292638  | 2.876184  | H    | -0.690217 | -3.699128 | -3.313464 |
| C    | 0.159450  | 2.340228  | 3.602735  | C    | 0.334997  | -1.203386 | -2.882278 |
| C    | 0.895256  | 1.161799  | 2.964028  | H    | 1.168725  | -0.533561 | -2.641852 |
| H    | 0.658437  | 0.220564  | 3.476055  | H    | 0.500276  | -1.600721 | -3.891533 |
| H    | 1.983312  | 1.283876  | 2.941953  | H    | -0.584748 | -0.604605 | -2.909766 |
| H    | 0.075899  | 2.238557  | 4.689051  | Li   | -1.822113 | -1.037405 | -0.417823 |
| H    | 0.680232  | 3.281514  | 3.387979  | N    | -3.473373 | -0.193229 | -0.198210 |
| H    | -1.839145 | 1.526214  | 3.318432  | C    | -4.051478 | 0.755066  | -1.136633 |
| H    | -1.732529 | 3.243549  | 2.899260  | H    | -5.074668 | 0.451494  | -1.440696 |
| H    | -0.542985 | 2.766123  | 0.844365  | C    | -4.191755 | 2.189825  | -0.565565 |
| H    | -1.554839 | 1.292172  | 0.945166  | H    | -4.727249 | 2.181864  | 0.390684  |
| O    | 1.430489  | 1.670399  | -1.175791 | H    | -3.199957 | 2.629221  | -0.388958 |
| C    | 2.362033  | 2.611417  | -0.590235 | H    | -4.740531 | 2.855156  | -1.248484 |
| C    | 2.031595  | 3.981378  | -1.195496 | C    | -3.229531 | 0.810435  | -2.431485 |

**Table 1 (continued).**

|   |           |           |           |   |           |           |           |
|---|-----------|-----------|-----------|---|-----------|-----------|-----------|
| C | 1.396825  | 3.601463  | -2.541374 | H | -3.218795 | -0.167767 | -2.927357 |
| C | 0.618701  | 2.342033  | -2.167343 | H | -3.622761 | 1.551838  | -3.139711 |
| H | 0.461461  | 1.651101  | -2.997124 | H | -2.189110 | 1.090089  | -2.208639 |
| H | -0.356815 | 2.590299  | -1.729510 | C | -4.455284 | -0.658590 | 0.770546  |
| H | 2.171402  | 3.367146  | -3.281413 | H | -5.090688 | 0.176118  | 1.136885  |
| H | 0.753979  | 4.383741  | -2.955458 | C | -3.765713 | -1.241244 | 2.011886  |
| H | 2.917509  | 4.615893  | -1.294714 | H | -3.127913 | -2.094005 | 1.735828  |
| H | 1.304517  | 4.514418  | -0.571654 | H | -3.132270 | -0.488318 | 2.497196  |
| H | 2.246530  | 2.576077  | 0.495823  | H | -4.492580 | -1.606775 | 2.748846  |
| H | 3.379106  | 2.290641  | -0.845179 | C | -5.429750 | -1.719169 | 0.199845  |
| O | 3.123998  | -0.355655 | 0.281821  | H | -6.219035 | -1.985464 | 0.918402  |
| C | 3.884319  | -0.698166 | 1.462459  | H | -5.919968 | -1.356966 | -0.710585 |
| C | 5.036776  | -1.587981 | 0.984951  | H | -4.877485 | -2.632210 | -0.061380 |
| C | 5.247152  | -1.102524 | -0.457405 | H | -0.837661 | -3.493070 | 0.452214  |
| C | 3.813156  | -0.820606 | -0.904353 | C | 0.002821  | -2.217016 | 1.931634  |
| H | 3.313168  | -1.725458 | -1.269264 | H | -0.156421 | -2.985811 | 2.697810  |
| H | 3.728498  | -0.039979 | -1.664952 | H | 0.946923  | -1.706678 | 2.165014  |
| H | 5.744968  | -1.840476 | -1.093202 | H | -0.803680 | -1.481984 | 2.018998  |
| H | 5.843084  | -0.181971 | -0.470974 | C | 1.267745  | -3.803060 | 0.483850  |
| H | 4.733115  | -2.640762 | 0.990469  | H | 1.237190  | -4.501783 | 1.329804  |
| H | 5.927155  | -1.487541 | 1.612590  | H | 1.294522  | -4.403056 | -0.431182 |
| H | 4.252285  | 0.230125  | 1.919222  | H | 2.207542  | -3.236852 | 0.541549  |
| H | 3.219570  | -1.199362 | 2.172042  |   |           |           |           |

**Table 1 (continued).**

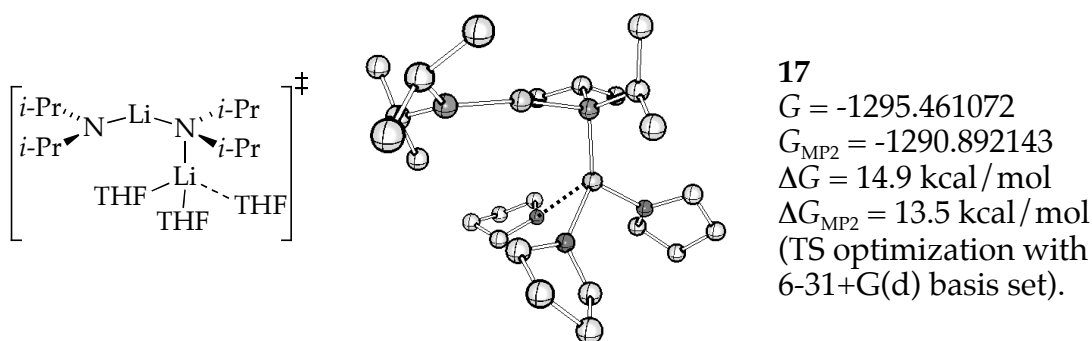

| Atom | X         | Y         | Z         | Atom | X         | Y         | Z         |
|------|-----------|-----------|-----------|------|-----------|-----------|-----------|
| C    | -0.045825 | -0.614018 | -2.831515 | H    | 4.542758  | 1.915379  | 0.738981  |
| N    | 0.252230  | -1.234589 | -1.528756 | C    | 4.539090  | 2.143615  | -1.389844 |
| Li   | -0.929733 | -0.635010 | -0.044926 | H    | 5.412292  | 1.517531  | -1.608566 |
| O    | -2.876562 | -1.152434 | 0.064566  | H    | 3.849123  | 2.059178  | -2.241139 |
| C    | -3.978872 | -0.222572 | 0.060737  | H    | 4.882730  | 3.188135  | -1.325407 |
| C    | -5.148184 | -1.011264 | 0.662805  | C    | 2.596971  | 2.549580  | 0.159017  |
| C    | -4.840061 | -2.482649 | 0.266972  | H    | 2.169062  | 2.345581  | 1.147545  |
| C    | -3.428207 | -2.418559 | -0.354749 | H    | 2.837960  | 3.620382  | 0.104151  |
| H    | -3.466252 | -2.439721 | -1.451383 | H    | 1.823863  | 2.345675  | -0.594777 |
| H    | -2.749205 | -3.201232 | -0.011284 | C    | 4.649542  | -0.558437 | 0.274579  |
| H    | -5.564589 | -2.876474 | -0.452666 | H    | 5.586555  | -0.152836 | -0.163464 |
| H    | -4.859655 | -3.137828 | 1.143260  | C    | 4.510284  | -1.984916 | -0.277767 |
| H    | -6.112829 | -0.663794 | 0.279583  | H    | 3.603667  | -2.466816 | 0.118545  |
| H    | -5.163894 | -0.898410 | 1.751988  | H    | 4.442633  | -1.973790 | -1.373321 |
| H    | -3.665151 | 0.660241  | 0.619128  | H    | 5.361047  | -2.619067 | 0.005453  |
| H    | -4.187923 | 0.073987  | -0.978041 | C    | 4.889644  | -0.631962 | 1.805501  |
| O    | -0.482864 | -0.286274 | 1.847942  | H    | 5.825024  | -1.157488 | 2.052888  |
| C    | -1.380346 | -0.527023 | 2.949470  | H    | 4.946813  | 0.371971  | 2.243641  |
| C    | -0.539634 | -1.239780 | 4.032609  | H    | 4.059332  | -1.163817 | 2.291507  |
| C    | 0.929004  | -1.004076 | 3.583978  | H    | 0.605808  | -1.022916 | -3.627535 |
| C    | 0.800690  | 0.014974  | 2.449236  | C    | 0.253888  | 0.891238  | -2.767613 |
| H    | 1.577112  | -0.043454 | 1.678681  | H    | 0.006866  | 1.386758  | -3.715348 |
| H    | 0.765247  | 1.043588  | 2.839224  | H    | -0.331458 | 1.372355  | -1.971369 |
| H    | 1.373139  | -1.930402 | 3.206232  | H    | 1.315760  | 1.085996  | -2.569350 |
| H    | 1.566827  | -0.634611 | 4.392582  | C    | -1.497513 | -0.815766 | -3.330923 |
| H    | -0.772325 | -2.308255 | 4.079041  | H    | -1.637460 | -0.372185 | -4.326471 |
| H    | -0.741504 | -0.816474 | 5.022061  | H    | -1.758803 | -1.877592 | -3.408730 |
| H    | -1.759462 | 0.440535  | 3.309674  | H    | -2.212847 | -0.339894 | -2.645208 |
| H    | -2.216671 | -1.113279 | 2.564836  | O    | -2.051368 | 2.489822  | 0.004120  |
| C    | 0.200091  | -2.705638 | -1.569220 | C    | -1.301101 | 3.309746  | 0.922705  |
| H    | -0.794376 | -3.063873 | -1.911204 | C    | -1.054325 | 4.633159  | 0.196465  |
| C    | 1.228400  | -3.373573 | -2.512914 | C    | -2.334790 | 4.770918  | -0.643605 |
| H    | 1.086904  | -3.069732 | -3.555730 | C    | -2.625247 | 3.314679  | -1.032705 |

**Table 1 (continued).**

|    |           |           |           |   |           |          |           |
|----|-----------|-----------|-----------|---|-----------|----------|-----------|
| H  | 2.254268  | -3.110258 | -2.223059 | H | -2.153202 | 3.047554 | -1.987008 |
| H  | 1.137963  | -4.468111 | -2.478209 | H | -3.697234 | 3.093894 | -1.102039 |
| C  | 0.392263  | -3.273276 | -0.151683 | H | -2.212016 | 5.418502 | -1.517666 |
| H  | -0.360865 | -2.893587 | 0.552658  | H | -3.150443 | 5.178226 | -0.033108 |
| H  | 0.320505  | -4.368303 | -0.150521 | H | -0.172766 | 4.552275 | -0.449913 |
| H  | 1.377520  | -3.004862 | 0.250681  | H | -0.896725 | 5.468991 | 0.885925  |
| Li | 2.018257  | -0.520613 | -0.918410 | H | -1.895717 | 3.461761 | 1.837013  |
| N  | 3.501941  | 0.259879  | -0.093801 | H | -0.384900 | 2.773307 | 1.181944  |
| C  | 3.839086  | 1.676967  | -0.086507 |   |           |          |           |

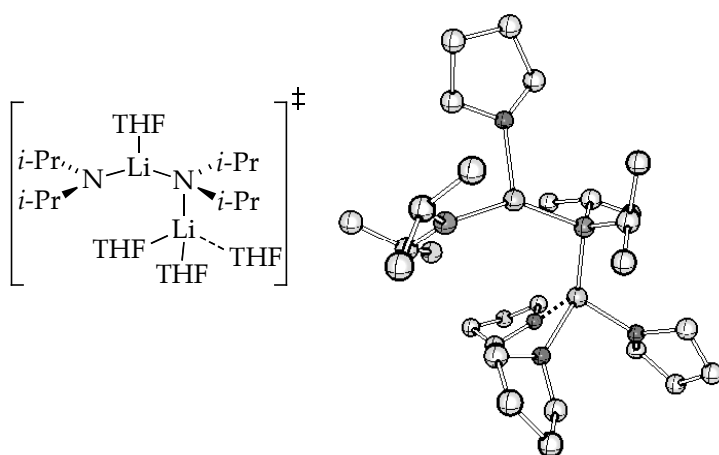

**18**  
 $G = -1527.803259$   
 $G_{\text{MP2}} = -1522.470944$   
 $\Delta G = 19.5 \text{ kcal/mol}$   
 $\Delta G_{\text{MP2}} = 10.2 \text{ kcal/mol}$   
 (TS optimization with  
 6-31+G(d) basis set).

| Atom | X         | Y         | Z         | Atom | X         | Y         | Z         |
|------|-----------|-----------|-----------|------|-----------|-----------|-----------|
| C    | -0.196447 | -2.460616 | 0.817736  | H    | -0.453385 | 1.605560  | 1.285197  |
| N    | -0.165669 | -1.526945 | -0.318073 | H    | -1.018572 | 2.935312  | 2.321953  |
| Li   | 1.468548  | -0.365725 | -0.292304 | H    | -1.901133 | 1.393882  | 2.284246  |
| O    | 3.336883  | -1.207007 | -0.729352 | C    | -3.443932 | 1.881708  | -1.457309 |
| C    | 4.478112  | -1.217170 | 0.148589  | H    | -4.423831 | 2.232223  | -1.057149 |
| C    | 5.690135  | -1.494232 | -0.760678 | C    | -3.769097 | 0.640237  | -2.303469 |
| C    | 5.070129  | -2.173658 | -2.014775 | H    | -2.871864 | 0.277111  | -2.822876 |
| C    | 3.570806  | -2.261563 | -1.681747 | H    | -4.150551 | -0.176100 | -1.677816 |
| H    | 3.314927  | -3.223900 | -1.217672 | H    | -4.525742 | 0.863889  | -3.067578 |
| H    | 2.907577  | -2.092325 | -2.531370 | C    | -2.964801 | 3.009175  | -2.408430 |
| H    | 5.495029  | -3.163052 | -2.211304 | H    | -3.730961 | 3.245895  | -3.161293 |
| H    | 5.232528  | -1.561404 | -2.907563 | H    | -2.741286 | 3.935220  | -1.864777 |
| H    | 6.424567  | -2.132762 | -0.259457 | H    | -2.052197 | 2.700404  | -2.936979 |
| H    | 6.196290  | -0.562458 | -1.032939 | O    | -3.558047 | -1.369285 | 0.769814  |
| H    | 4.494834  | -0.258024 | 0.667027  | C    | -3.936765 | -2.726034 | 1.043099  |
| H    | 4.345347  | -2.017837 | 0.891433  | C    | -5.476967 | -2.777258 | 0.904550  |
| O    | 1.769377  | 1.441675  | -1.044857 | C    | -5.903455 | -1.283544 | 0.928928  |
| C    | 2.988911  | 1.961597  | -1.599748 | C    | -4.611217 | -0.548372 | 1.306437  |

**Table 1 (continued).**

|    |           |           |           |   |           |           |           |
|----|-----------|-----------|-----------|---|-----------|-----------|-----------|
| C  | 2.595253  | 2.600864  | -2.948680 | H | -4.494165 | -0.485595 | 2.401084  |
| C  | 1.057673  | 2.801119  | -2.832816 | H | -4.478704 | 0.442828  | 0.871111  |
| C  | 0.741892  | 2.405820  | -1.385937 | H | -6.711729 | -1.085137 | 1.640742  |
| H  | -0.236795 | 1.937059  | -1.231309 | H | -6.243572 | -0.962270 | -0.060955 |
| H  | 0.840935  | 3.266467  | -0.708144 | H | -5.924715 | -3.348357 | 1.725032  |
| H  | 0.527380  | 2.143356  | -3.528542 | H | -5.776070 | -3.258706 | -0.031955 |
| H  | 0.747067  | 3.828335  | -3.046437 | H | -3.405878 | -3.364963 | 0.336130  |
| H  | 2.843390  | 1.940062  | -3.785543 | H | -3.620442 | -2.989392 | 2.063970  |
| H  | 3.127897  | 3.544721  | -3.105794 | H | -1.075067 | -3.133426 | 0.766816  |
| H  | 3.398990  | 2.714272  | -0.909305 | C | -0.340003 | -1.669960 | 2.127507  |
| H  | 3.691238  | 1.130452  | -1.679330 | H | -0.310491 | -2.335707 | 3.000756  |
| C  | -0.195324 | -2.211705 | -1.620168 | H | 0.473088  | -0.939447 | 2.228312  |
| H  | 0.635637  | -2.943678 | -1.715532 | H | -1.286679 | -1.119716 | 2.162428  |
| C  | -1.481347 | -3.023967 | -1.913092 | C | 1.029777  | -3.402289 | 0.937101  |
| H  | -1.631020 | -3.824796 | -1.179903 | H | 0.914552  | -4.091133 | 1.785951  |
| H  | -2.368113 | -2.376440 | -1.895938 | H | 1.164684  | -4.014966 | 0.038001  |
| H  | -1.428256 | -3.497711 | -2.903358 | H | 1.951282  | -2.824468 | 1.093609  |
| C  | 0.006113  | -1.189761 | -2.752509 | O | 2.687943  | 0.673635  | 2.141310  |
| H  | 0.964814  | -0.662154 | -2.663485 | C | 2.598826  | 2.104309  | 2.297767  |
| H  | -0.013963 | -1.677350 | -3.736028 | C | 2.372380  | 2.341950  | 3.790337  |
| H  | -0.782411 | -0.428464 | -2.734923 | C | 3.209736  | 1.212669  | 4.413121  |
| Li | -1.878772 | -0.286358 | -0.119542 | C | 3.010177  | 0.064521  | 3.411986  |
| N  | -2.518301 | 1.533126  | -0.389943 | H | 2.176639  | -0.587642 | 3.698297  |
| C  | -2.226424 | 2.628391  | 0.516873  | H | 3.906964  | -0.554958 | 3.288454  |
| H  | -1.638447 | 3.445861  | 0.027258  | H | 2.889027  | 0.941413  | 5.424025  |
| C  | -3.451777 | 3.351064  | 1.137397  | H | 4.266129  | 1.504962  | 4.461991  |
| H  | -4.079083 | 3.831038  | 0.378093  | H | 1.310899  | 2.219793  | 4.035774  |
| H  | -4.081380 | 2.643660  | 1.695167  | H | 2.686208  | 3.340671  | 4.111522  |
| H  | -3.124397 | 4.136101  | 1.834378  | H | 3.541186  | 2.565117  | 1.961266  |
| C  | -1.346446 | 2.114993  | 1.667865  | H | 1.785505  | 2.459783  | 1.661939  |

**Table 1 (continued).**

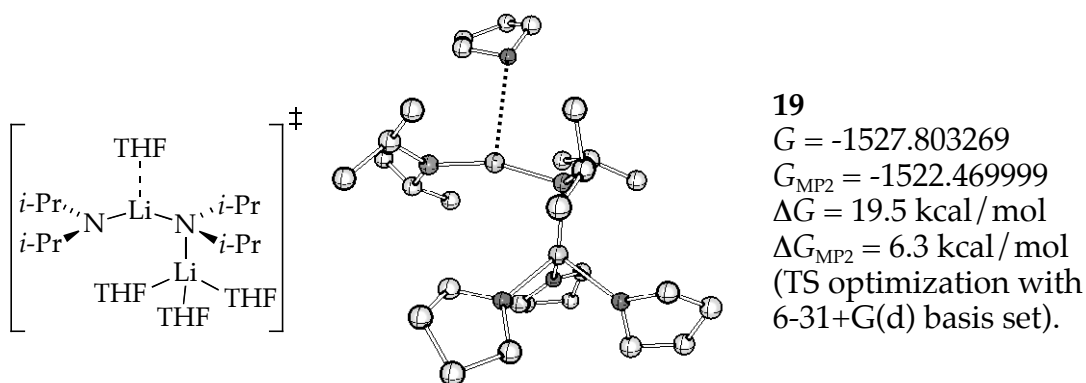

| Atom | X         | Y         | Z         | Atom | X         | Y         | Z         |
|------|-----------|-----------|-----------|------|-----------|-----------|-----------|
| C    | -0.238871 | -2.426705 | -0.404391 | C    | 0.661661  | 0.119411  | -3.057158 |
| N    | 0.029759  | -1.106138 | -1.004037 | H    | 1.675673  | 0.330677  | -2.697698 |
| Li   | 1.662223  | -0.150980 | -0.189125 | H    | 0.695877  | 0.080494  | -4.153664 |
| O    | 2.281252  | -0.241571 | 1.878914  | H    | 0.026599  | 0.968248  | -2.772044 |
| C    | 2.427056  | 0.939779  | 2.707827  | Li   | -1.478394 | 0.136465  | -0.457200 |
| C    | 2.657552  | 0.430601  | 4.133235  | N    | -2.415818 | 1.679612  | 0.112992  |
| C    | 3.349155  | -0.920147 | 3.888973  | C    | -2.357183 | 2.198724  | 1.468824  |
| C    | 2.619905  | -1.423663 | 2.642810  | H    | -1.827045 | 3.182221  | 1.520191  |
| H    | 1.695603  | -1.953458 | 2.902686  | C    | -3.723584 | 2.440657  | 2.158807  |
| H    | 3.225625  | -2.074455 | 2.005090  | H    | -4.325728 | 3.192824  | 1.636805  |
| H    | 3.258657  | -1.613000 | 4.731629  | H    | -4.304752 | 1.508585  | 2.192439  |
| H    | 4.417335  | -0.774681 | 3.682783  | H    | -3.581640 | 2.793815  | 3.190372  |
| H    | 1.700054  | 0.282109  | 4.646256  | C    | -1.545100 | 1.237535  | 2.350261  |
| H    | 3.258205  | 1.124569  | 4.729891  | H    | -0.566257 | 1.023138  | 1.901987  |
| H    | 3.284638  | 1.516255  | 2.336140  | H    | -1.375873 | 1.655151  | 3.352663  |
| H    | 1.525195  | 1.546046  | 2.603596  | H    | -2.072908 | 0.281515  | 2.464347  |
| O    | 3.589118  | -0.767341 | -0.878866 | C    | -3.260134 | 2.455913  | -0.783573 |
| C    | 4.855662  | -0.559871 | -0.237070 | H    | -4.315258 | 2.484481  | -0.429836 |
| C    | 5.609444  | -1.897433 | -0.371172 | C    | -3.303492 | 1.789215  | -2.165959 |
| C    | 4.926582  | -2.585088 | -1.587918 | H    | -2.306369 | 1.793115  | -2.629282 |
| C    | 3.874539  | -1.560238 | -2.045770 | H    | -3.641468 | 0.748230  | -2.090421 |
| H    | 2.935224  | -1.995474 | -2.384775 | H    | -3.986127 | 2.315624  | -2.846249 |
| H    | 4.271807  | -0.902817 | -2.834398 | C    | -2.845464 | 3.938857  | -0.965176 |
| H    | 4.444369  | -3.519118 | -1.284621 | H    | -3.550636 | 4.468415  | -1.622192 |
| H    | 5.634078  | -2.820073 | -2.389429 | H    | -2.818946 | 4.477255  | -0.010197 |
| H    | 5.493472  | -2.503752 | 0.532753  | H    | -1.845639 | 4.004800  | -1.416419 |
| H    | 6.681427  | -1.737233 | -0.525176 | H    | -1.026417 | -2.962526 | -0.965046 |
| H    | 5.393651  | 0.249558  | -0.754566 | C    | -0.783382 | -2.264863 | 1.023323  |
| H    | 4.652765  | -0.250814 | 0.789370  | H    | -0.876710 | -3.235583 | 1.529220  |
| O    | 1.928296  | 1.898520  | -0.333113 | H    | -0.121387 | -1.630484 | 1.625645  |
| C    | 3.089354  | 2.494365  | -0.957756 | H    | -1.780236 | -1.807841 | 1.017712  |
| C    | 2.739373  | 3.968629  | -1.231038 | C    | 0.981701  | -3.381552 | -0.390295 |
| C    | 1.202781  | 3.978952  | -1.163534 | H    | 0.711160  | -4.370295 | 0.007641  |

**Table 1 (continued).**

|   |           |           |           |   |           |           |           |
|---|-----------|-----------|-----------|---|-----------|-----------|-----------|
| C | 0.927207  | 2.925640  | -0.097381 | H | 1.379400  | -3.537467 | -1.400307 |
| H | -0.064673 | 2.461753  | -0.157825 | H | 1.791900  | -2.976852 | 0.231016  |
| H | 1.075043  | 3.338412  | 0.911922  | O | -4.160373 | -1.936187 | -0.413705 |
| H | 0.765667  | 3.669955  | -2.120257 | C | -5.142472 | -0.960933 | -0.047118 |
| H | 0.790739  | 4.958113  | -0.901058 | C | -5.890000 | -1.575565 | 1.151294  |
| H | 3.132297  | 4.311735  | -2.193642 | C | -5.714114 | -3.107199 | 0.944563  |
| H | 3.157813  | 4.615290  | -0.450291 | C | -4.808336 | -3.201647 | -0.305159 |
| H | 3.950351  | 2.384344  | -0.286825 | H | -5.408471 | -3.389831 | -1.211482 |
| H | 3.293243  | 1.936163  | -1.877876 | H | -4.030634 | -3.967729 | -0.237438 |
| C | 0.110138  | -1.191124 | -2.473028 | H | -6.668732 | -3.621064 | 0.787014  |
| H | 0.813396  | -1.992553 | -2.788561 | H | -5.232244 | -3.566764 | 1.813856  |
| C | -1.226745 | -1.519379 | -3.184535 | H | -6.941805 | -1.270951 | 1.176029  |
| H | -1.680814 | -2.441624 | -2.808195 | H | -5.430176 | -1.255766 | 2.092249  |
| H | -1.955583 | -0.711866 | -3.043030 | H | -4.607962 | -0.033469 | 0.171733  |
| H | -1.073029 | -1.645734 | -4.265981 | H | -5.828549 | -0.794962 | -0.895112 |

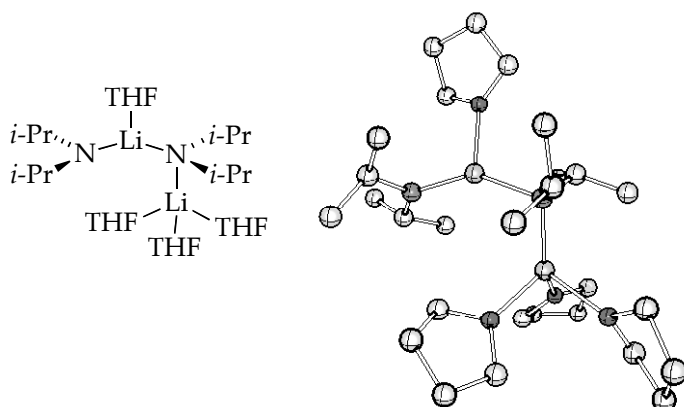

**20a**

$G = -1527.804376$

$G_{\text{MP2}} = -1522.476652$

$\Delta G = 18.8 \text{ kcal/mol}$

$\Delta G_{\text{MP2}} = 4.4 \text{ kcal/mol}$   
(connects to 18)

| Atom | X         | Y         | Z         | Atom | X         | Y         | Z         |
|------|-----------|-----------|-----------|------|-----------|-----------|-----------|
| C    | -0.220100 | -2.602555 | 0.340672  | H    | -0.596782 | 1.199732  | 1.751442  |
| N    | -0.130639 | -1.400117 | -0.501945 | H    | -1.197381 | 2.263832  | 3.046307  |
| Li   | 1.521602  | -0.284739 | -0.002248 | H    | -2.097546 | 0.800028  | 2.597454  |
| O    | 3.436514  | -0.981493 | -0.801971 | C    | -3.399405 | 2.178875  | -1.006747 |
| C    | 4.689411  | -0.975323 | -0.106090 | H    | -4.397238 | 2.442808  | -0.589969 |
| C    | 5.770488  | -0.920519 | -1.202703 | C    | -3.681355 | 1.172838  | -2.133241 |
| C    | 5.047078  | -1.482596 | -2.458187 | H    | -2.757156 | 0.925542  | -2.672979 |
| C    | 3.640187  | -1.833196 | -1.942514 | H    | -4.094937 | 0.240378  | -1.731404 |
| H    | 3.580319  | -2.883135 | -1.623317 | H    | -4.393328 | 1.576062  | -2.865260 |
| H    | 2.835443  | -1.635002 | -2.649914 | C    | -2.866037 | 3.488110  | -1.641733 |
| H    | 5.550407  | -2.358348 | -2.878089 | H    | -3.596547 | 3.923502  | -2.338190 |
| H    | 4.992811  | -0.724635 | -3.245442 | H    | -2.644203 | 4.246953  | -0.882177 |
| H    | 6.650053  | -1.508959 | -0.925027 | H    | -1.941045 | 3.292745  | -2.200724 |
| H    | 6.103223  | 0.107959  | -1.372199 | O    | -3.584953 | -1.516354 | 0.316089  |



**Table 1 (continued).**

|    |           |           |           |   |           |           |           |
|----|-----------|-----------|-----------|---|-----------|-----------|-----------|
| H  | 4.685692  | -0.120925 | 0.572108  | C | -4.003830 | -2.876855 | 0.160444  |
| H  | 4.780691  | -1.898831 | 0.485592  | C | -5.530059 | -2.823928 | -0.083011 |
| O  | 1.787724  | 1.688006  | -0.513791 | C | -5.931719 | -1.399486 | 0.389952  |
| C  | 3.007604  | 2.273195  | -1.002630 | C | -4.645900 | -0.857729 | 1.028143  |
| C  | 2.602554  | 3.397118  | -1.988348 | H | -4.589326 | -1.129968 | 2.094887  |
| C  | 1.057732  | 3.365997  | -1.969539 | H | -4.465345 | 0.211734  | 0.912565  |
| C  | 0.746275  | 2.685273  | -0.640170 | H | -6.768263 | -1.407359 | 1.095602  |
| H  | -0.225268 | 2.178710  | -0.594074 | H | -6.219763 | -0.777627 | -0.463150 |
| H  | 0.827386  | 3.394770  | 0.197351  | H | -6.045095 | -3.609734 | 0.478768  |
| H  | 0.670917  | 2.757234  | -2.793230 | H | -5.767512 | -2.967790 | -1.141288 |
| H  | 0.610788  | 4.361134  | -2.045063 | H | -3.435851 | -3.305239 | -0.666098 |
| H  | 3.006173  | 3.226928  | -2.990988 | H | -3.769842 | -3.437912 | 1.077924  |
| H  | 2.981825  | 4.364424  | -1.642679 | H | -1.030088 | -3.277291 | 0.001573  |
| H  | 3.583129  | 2.676333  | -0.156504 | C | -0.586256 | -2.204226 | 1.779231  |
| H  | 3.582896  | 1.468354  | -1.463417 | H | -0.544868 | -3.066135 | 2.458681  |
| C  | -0.073830 | -1.730097 | -1.934660 | H | 0.101338  | -1.437512 | 2.153890  |
| H  | 0.760203  | -2.428673 | -2.161118 | H | -1.599251 | -1.791425 | 1.826088  |
| C  | -1.335283 | -2.421592 | -2.509301 | C | 1.056822  | -3.480130 | 0.358224  |
| H  | -1.534753 | -3.379771 | -2.017619 | H | 0.913426  | -4.381846 | 0.969590  |
| H  | -2.222279 | -1.786164 | -2.387101 | H | 1.331218  | -3.810275 | -0.650088 |
| H  | -1.214992 | -2.628837 | -3.581306 | H | 1.910394  | -2.924104 | 0.769903  |
| C  | 0.196716  | -0.459699 | -2.755988 | O | 2.338128  | -0.007549 | 1.994469  |
| H  | 1.143482  | 0.013480  | -2.470949 | C | 2.387995  | 1.320192  | 2.572907  |
| H  | 0.236709  | -0.680734 | -3.830468 | C | 2.551761  | 1.110427  | 4.077657  |
| H  | -0.594140 | 0.282051  | -2.592212 | C | 3.379154  | -0.182078 | 4.127543  |
| Li | -1.869401 | -0.248064 | -0.150765 | C | 2.780414  | -0.982841 | 2.969244  |
| N  | -2.534703 | 1.577768  | -0.003848 | H | 1.916095  | -1.573208 | 3.291945  |
| C  | -2.302323 | 2.421160  | 1.154060  | H | 3.496103  | -1.653691 | 2.485508  |
| H  | -1.682013 | 3.321332  | 0.916866  | H | 3.303525  | -0.712736 | 5.081241  |
| C  | -3.564567 | 2.994359  | 1.849184  | H | 4.438469  | 0.034937  | 3.943083  |
| H  | -4.148150 | 3.636649  | 1.180921  | H | 1.573952  | 0.958413  | 4.548760  |
| H  | -4.223494 | 2.184886  | 2.191807  | H | 3.038686  | 1.959114  | 4.567348  |
| H  | -3.288461 | 3.598940  | 2.724188  | H | 3.246337  | 1.857860  | 2.147980  |
| C  | -1.499925 | 1.631611  | 2.199937  | H | 1.473106  | 1.847178  | 2.299874  |

**Table 1 (continued).**

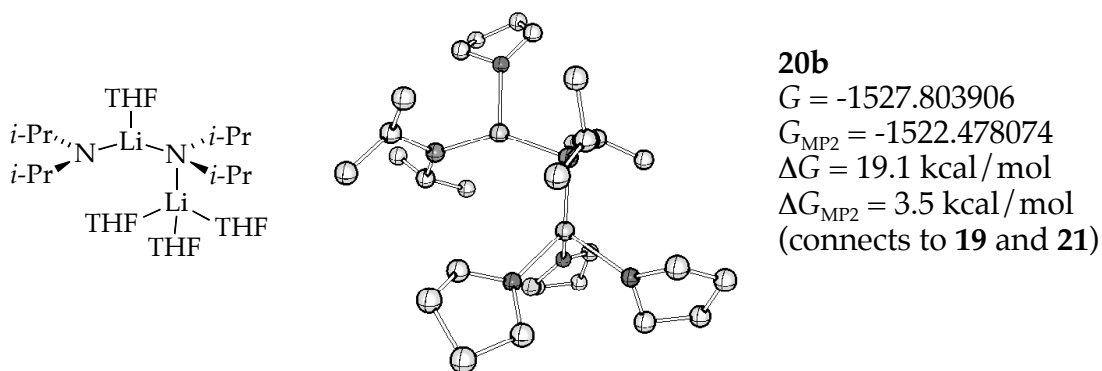

| Atom | X         | Y         | Z         | Atom | X         | Y         | Z         |
|------|-----------|-----------|-----------|------|-----------|-----------|-----------|
| C    | -0.084948 | -2.606720 | -0.058656 | O    | 1.688377  | 1.888125  | -0.547285 |
| N    | -0.055665 | -1.326339 | -0.780619 | Li   | -1.852230 | -0.278723 | -0.326158 |
| Li   | 1.494492  | -0.122263 | -0.150949 | N    | -2.538252 | 1.499965  | 0.081021  |
| O    | 2.219285  | 0.095245  | 1.882731  | C    | -2.404870 | 2.124972  | 1.384549  |
| C    | 2.302024  | 1.404017  | 2.499872  | H    | -1.873793 | 3.107194  | 1.335315  |
| C    | 2.540024  | 1.148167  | 3.988503  | C    | -3.728245 | 2.427781  | 2.132955  |
| C    | 3.333920  | -0.165765 | 3.965086  | H    | -4.380850 | 3.098396  | 1.563736  |
| C    | 2.655995  | -0.917874 | 2.818514  | H    | -4.285807 | 1.499822  | 2.321108  |
| H    | 1.782249  | -1.479556 | 3.167710  | H    | -3.532105 | 2.905758  | 3.102860  |
| H    | 3.320519  | -1.608174 | 2.289927  | C    | -1.541977 | 1.233855  | 2.289538  |
| H    | 3.291023  | -0.718856 | 4.908019  | H    | -0.598780 | 0.973644  | 1.794673  |
| H    | 4.388615  | 0.027460  | 3.732831  | H    | -1.309056 | 1.726205  | 3.243999  |
| H    | 1.584930  | 1.008007  | 4.507419  | H    | -2.064213 | 0.294034  | 2.515254  |
| H    | 3.073645  | 1.971175  | 4.473338  | C    | -3.426777 | 2.210448  | -0.826199 |
| H    | 3.136690  | 1.952393  | 2.044127  | H    | -4.477668 | 2.231927  | -0.453049 |
| H    | 1.375502  | 1.941127  | 2.293494  | C    | -3.485710 | 1.480496  | -2.176919 |
| C    | -0.002232 | -1.533121 | -2.236810 | H    | -2.502609 | 1.500602  | -2.666203 |
| H    | 0.790458  | -2.262417 | -2.512403 | H    | -3.776185 | 0.430999  | -2.048620 |
| C    | -1.299116 | -2.095685 | -2.869954 | H    | -4.208216 | 1.949104  | -2.857906 |
| H    | -1.610533 | -3.031477 | -2.395182 | C    | -3.068886 | 3.694087  | -1.095547 |
| H    | -2.125597 | -1.380511 | -2.774786 | H    | -3.820823 | 4.170217  | -1.740052 |
| H    | -1.156293 | -2.303396 | -3.939455 | H    | -3.011854 | 4.279113  | -0.170650 |
| C    | 0.354535  | -0.221026 | -2.952399 | H    | -2.097174 | 3.770524  | -1.600476 |
| H    | 1.344766  | 0.145974  | -2.659175 | O    | -3.597800 | -1.608569 | -0.217104 |
| H    | 0.352981  | -0.348765 | -4.042500 | C    | -4.825404 | -0.981956 | 0.193266  |
| H    | -0.372777 | 0.561051  | -2.702830 | C    | -5.359492 | -1.901708 | 1.293337  |
| H    | -0.804371 | -3.311841 | -0.520002 | C    | -4.919665 | -3.309770 | 0.815529  |
| C    | -0.566415 | -2.391519 | 1.384710  | C    | -3.874004 | -3.014220 | -0.289891 |
| H    | -0.499149 | -3.314641 | 1.975761  | H    | -4.272215 | -3.255329 | -1.285944 |
| H    | 0.037549  | -1.623362 | 1.880757  | H    | -2.928429 | -3.541870 | -0.156121 |
| H    | -1.608142 | -2.053442 | 1.409244  | H    | -5.760404 | -3.881999 | 0.410149  |
| C    | 1.262313  | -3.373320 | -0.036976 | H    | -4.489755 | -3.895554 | 1.633618  |
| H    | 1.162982  | -4.344729 | 0.467309  | H    | -6.442621 | -1.814888 | 1.423912  |

**Table 1 (continued).**

|   |          |           |           |   |           |           |           |
|---|----------|-----------|-----------|---|-----------|-----------|-----------|
| H | 1.627051 | -3.571637 | -1.051301 | H | -4.883666 | -1.652385 | 2.247727  |
| H | 2.033525 | -2.795376 | 0.488848  | H | -4.560734 | 0.029196  | 0.502302  |
| O | 3.472215 | -0.647330 | -0.871708 | H | -5.519515 | -0.941619 | -0.661374 |
| C | 4.729895 | -0.358088 | -0.249191 | C | 2.815575  | 2.465746  | -1.240705 |
| C | 5.544863 | -1.661585 | -0.348655 | C | 2.345489  | 3.820158  | -1.803044 |
| C | 4.898785 | -2.405326 | -1.551024 | C | 0.813292  | 3.702133  | -1.753136 |
| C | 3.792218 | -1.445475 | -2.022297 | C | 0.604882  | 2.854463  | -0.504359 |
| H | 2.876032 | -1.936371 | -2.348171 | H | -0.345607 | 2.305932  | -0.463780 |
| H | 4.153070 | -0.787648 | -2.828105 | H | 0.709548  | 3.466500  | 0.404310  |
| H | 4.467046 | -3.356881 | -1.228986 | H | 0.433270  | 3.171851  | -2.633701 |
| H | 5.615372 | -2.616835 | -2.350177 | H | 0.309938  | 4.671141  | -1.693252 |
| H | 5.448271 | -2.251668 | 0.567633  | H | 2.734022  | 4.004727  | -2.809279 |
| H | 6.609231 | -1.458064 | -0.499892 | H | 2.682900  | 4.641278  | -1.160045 |
| H | 5.227481 | 0.458654  | -0.794773 | H | 3.655015  | 2.574158  | -0.542094 |
| H | 4.519466 | -0.026570 | 0.767778  | H | 3.113411  | 1.766516  | -2.028012 |

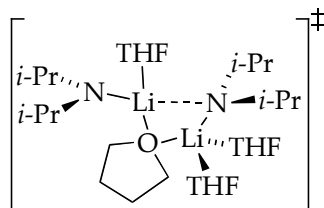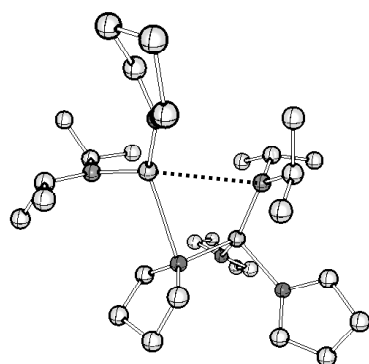

**21**  
 $G = -1527.783839$   
 $G_{\text{MP2}} = -1522.449067$   
 $\Delta G = 31.6 \text{ kcal/mol}$   
 $\Delta G_{\text{MP2}} = 21.7 \text{ kcal/mol}$

| Atom | X        | Y         | Z         | Atom | X         | Y         | Z         |
|------|----------|-----------|-----------|------|-----------|-----------|-----------|
| C    | 1.103940 | 1.633539  | -2.616314 | O    | 0.285328  | -0.703361 | 1.443430  |
| N    | 0.919494 | 1.595045  | -1.169017 | Li   | -2.051919 | 0.044382  | -0.074471 |
| Li   | 1.593178 | 0.139784  | -0.059698 | N    | -3.067364 | -1.558909 | -0.137854 |
| O    | 2.591887 | -1.734877 | -0.741140 | C    | -3.117930 | -2.414348 | -1.312427 |
| C    | 2.028028 | -2.839289 | -1.491943 | H    | -2.883101 | -3.475298 | -1.071623 |
| C    | 3.081312 | -3.221845 | -2.530858 | C    | -4.482866 | -2.452302 | -2.043657 |
| C    | 4.386135 | -2.898612 | -1.789115 | H    | -5.286829 | -2.811173 | -1.391854 |
| C    | 4.007388 | -1.630408 | -1.020075 | H    | -4.759173 | -1.446736 | -2.390465 |
| H    | 4.176277 | -0.729191 | -1.622445 | H    | -4.448838 | -3.117067 | -2.917800 |
| H    | 4.540292 | -1.521554 | -0.072089 | C    | -2.043525 | -1.967055 | -2.309248 |
| H    | 5.238884 | -2.740712 | -2.456271 | H    | -1.058355 | -1.960581 | -1.827574 |
| H    | 4.642692 | -3.708223 | -1.095260 | H    | -1.990693 | -2.624849 | -3.186207 |
| H    | 2.981982 | -2.593592 | -3.422820 | H    | -2.247016 | -0.948555 | -2.671527 |

**Table 1 (continued).**

|   |           |           |           |   |           |           |           |
|---|-----------|-----------|-----------|---|-----------|-----------|-----------|
| H | 3.002504  | -4.268854 | -2.838298 | C | -4.023378 | -1.931099 | 0.893268  |
| H | 1.828848  | -3.670094 | -0.801792 | H | -5.073424 | -1.877988 | 0.528505  |
| H | 1.083029  | -2.508775 | -1.926504 | C | -3.951153 | -0.936535 | 2.061602  |
| C | 0.772759  | 2.928671  | -0.605012 | H | -2.951591 | -0.950875 | 2.520682  |
| H | 1.689249  | 3.553763  | -0.746686 | H | -4.147573 | 0.083584  | 1.713534  |
| C | -0.375486 | 3.785387  | -1.198553 | H | -4.680811 | -1.175798 | 2.845602  |
| H | -0.210499 | 4.020057  | -2.255200 | C | -3.864453 | -3.366983 | 1.453608  |
| H | -1.324817 | 3.242291  | -1.120455 | H | -4.624120 | -3.583325 | 2.217459  |
| H | -0.467450 | 4.743564  | -0.667598 | H | -3.966159 | -4.124340 | 0.668646  |
| C | 0.581380  | 2.842668  | 0.916230  | H | -2.873757 | -3.496662 | 1.909316  |
| H | 1.431730  | 2.341198  | 1.392293  | O | -3.065517 | 1.772657  | 0.002608  |
| H | 0.482074  | 3.837903  | 1.369608  | C | -3.290067 | 2.805188  | 0.990135  |
| H | -0.320801 | 2.265403  | 1.154316  | C | -4.470510 | 3.630967  | 0.471097  |
| H | 0.286077  | 2.188725  | -3.118792 | C | -5.262989 | 2.593713  | -0.339721 |
| C | 1.058797  | 0.221878  | -3.208770 | C | -4.146450 | 1.763388  | -0.969540 |
| H | 1.133206  | 0.243515  | -4.303813 | H | -3.778265 | 2.219066  | -1.897809 |
| H | 1.893809  | -0.379501 | -2.828211 | H | -4.400377 | 0.715384  | -1.147751 |
| H | 0.124645  | -0.278967 | -2.937442 | H | -5.921291 | 3.042519  | -1.089593 |
| C | 2.415669  | 2.316870  | -3.082289 | H | -5.874089 | 1.971538  | 0.324496  |
| H | 2.488562  | 2.347627  | -4.178553 | H | -4.113184 | 4.434798  | -0.182813 |
| H | 2.491169  | 3.349339  | -2.722350 | H | -5.048422 | 4.083304  | 1.282822  |
| H | 3.287144  | 1.766765  | -2.698542 | H | -3.525576 | 2.322415  | 1.947585  |
| O | 3.349495  | 0.684193  | 1.032764  | H | -2.369793 | 3.383072  | 1.099004  |
| C | 3.959380  | 0.209072  | 2.250534  | C | 0.249967  | -0.183018 | 2.790691  |
| C | 5.293130  | 0.953587  | 2.382638  | C | 0.595316  | -1.364292 | 3.693201  |
| C | 5.003107  | 2.265282  | 1.637032  | C | -0.097747 | -2.523215 | 2.961149  |
| C | 4.123063  | 1.781699  | 0.486145  | C | 0.077098  | -2.152394 | 1.482989  |
| H | 4.729840  | 1.405682  | -0.348356 | H | -0.808157 | -2.371408 | 0.875649  |
| H | 3.421946  | 2.521528  | 0.100015  | H | 0.969895  | -2.613303 | 1.052593  |
| H | 5.906696  | 2.773855  | 1.287984  | H | -1.160124 | -2.555665 | 3.224274  |
| H | 4.447698  | 2.958820  | 2.279562  | H | 0.335435  | -3.500816 | 3.194064  |
| H | 6.094857  | 0.399940  | 1.879417  | H | 0.241465  | -1.224482 | 4.719593  |
| H | 5.587457  | 1.098058  | 3.426485  | H | 1.681098  | -1.517175 | 3.722553  |
| H | 3.290385  | 0.437760  | 3.089910  | H | 0.952726  | 0.649902  | 2.847488  |
| H | 4.073201  | -0.878747 | 2.187124  | H | -0.758314 | 0.195485  | 3.008439  |

**Table 2.** Optimized geometries of THF solvated LDA open dimers at the B3LYP level of theory with a 6-31G(d) basis set at -78 °C with free energies (Hartrees) and cartesian coordinates (X, Y, Z). Single point MP2 energies are included. A representative image is shown in Table 2a. The geometries of the open dimers are categorized most conveniently by two pseudo-dihedral angles  $\omega_C$  and  $\omega_O$  as shown in Table 2b.  $\omega_C$  is defined by a dihedral angle spanning atoms C-N-N-C and  $\omega_O$  is defined by a dihedral angle spanning atoms O-Li-N-Li. Although the direction of the arrow is irrelevant for the measure of the dihedral angle, it indicates the sign of the angle (clockwise = minus, counter-clockwise = plus). The caption below the energy values indicates the connectivity of transition states and ground states. Structure **4i** and **4j** represent the meso stereoisomer in contrast to the homochiral form.

a)

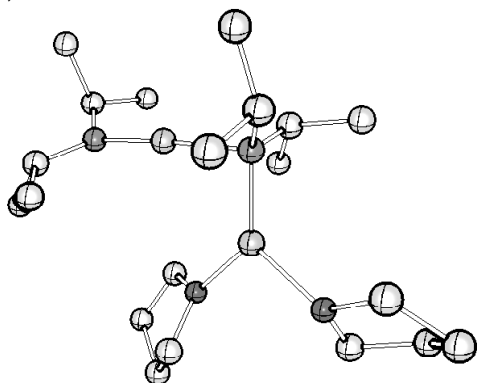

b)

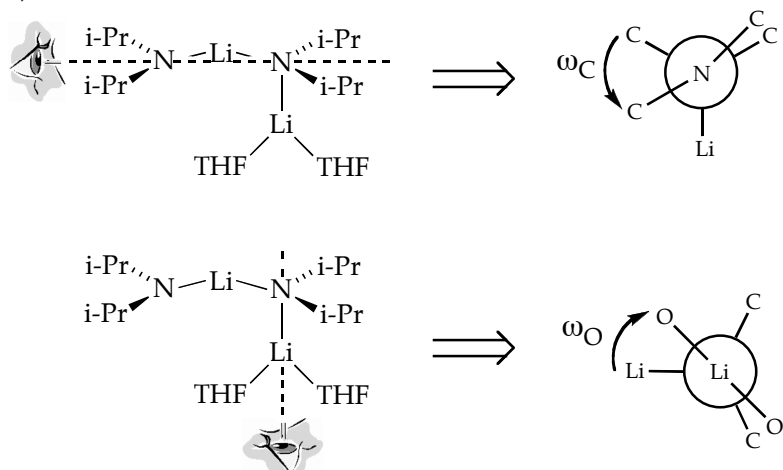

Table 2 (continued).

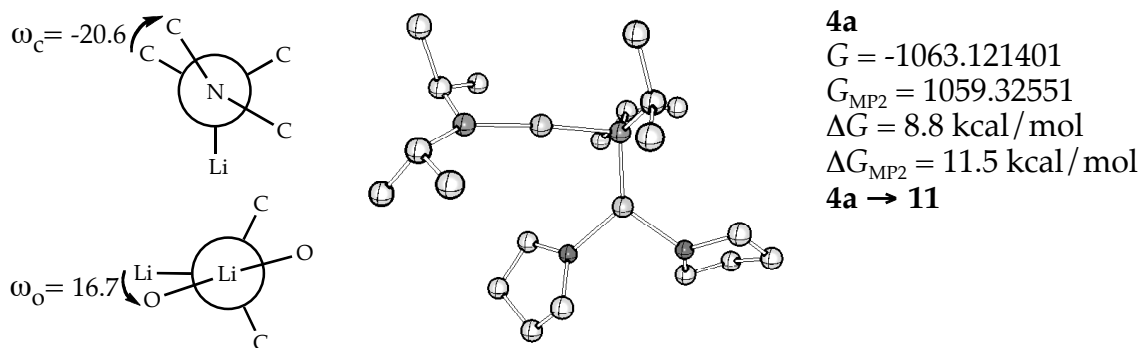

| Atom | X         | Y         | Z         | Atom | X         | Y         | Z         |
|------|-----------|-----------|-----------|------|-----------|-----------|-----------|
| C    | -0.562689 | -2.265881 | -1.273584 | H    | 4.429804  | -2.626589 | 0.038385  |
| N    | -0.399930 | -1.595055 | 0.026309  | H    | 5.865412  | -2.071460 | -0.860057 |
| Li   | -1.310697 | 0.120142  | 0.137474  | C    | 3.541530  | -1.160201 | -2.099251 |
| O    | -3.235353 | 0.436506  | 0.443202  | H    | 3.007426  | -0.359350 | -2.624624 |
| C    | -4.029225 | 1.203369  | -0.492261 | H    | 4.283446  | -1.588171 | -2.785653 |
| C    | -5.252234 | 0.337764  | -0.784390 | H    | 2.818445  | -1.958504 | -1.868778 |
| C    | -5.491255 | -0.335016 | 0.576788  | C    | 3.716840  | 0.761867  | 1.113708  |
| C    | -4.065631 | -0.570460 | 1.089302  | H    | 4.616486  | 0.320037  | 1.592664  |
| H    | -3.676453 | -1.552632 | 0.804545  | C    | 2.693137  | 0.953929  | 2.242040  |
| H    | -3.969694 | -0.450763 | 2.172290  | H    | 1.750785  | 1.353316  | 1.835476  |
| H    | -6.060372 | -1.265821 | 0.502436  | H    | 2.472772  | -0.002082 | 2.732897  |
| H    | -6.035840 | 0.341466  | 1.245451  | H    | 3.048490  | 1.655288  | 3.008069  |
| H    | -5.013673 | -0.411132 | -1.548190 | C    | 4.164044  | 2.153674  | 0.598371  |
| H    | -6.106823 | 0.924543  | -1.133515 | H    | 4.655911  | 2.742686  | 1.385944  |
| H    | -4.312377 | 2.156872  | -0.026069 | H    | 4.869370  | 2.063067  | -0.234927 |
| H    | -3.407765 | 1.411239  | -1.367486 | H    | 3.297195  | 2.722807  | 0.236351  |
| O    | -0.603464 | 1.905058  | -0.151897 | C    | -0.574569 | -2.487002 | 1.182124  |
| C    | -0.887718 | 3.024742  | 0.712892  | H    | -1.566770 | -2.981261 | 1.165061  |
| C    | -0.618184 | 4.254224  | -0.148305 | C    | 0.466186  | -3.625332 | 1.276162  |
| C    | 0.617291  | 3.806938  | -0.948377 | H    | 0.448645  | -4.264177 | 0.386312  |
| C    | 0.392800  | 2.299835  | -1.150099 | H    | 1.483281  | -3.219260 | 1.373752  |
| H    | 1.299551  | 1.703356  | -0.994149 | H    | 0.276594  | -4.267165 | 2.146480  |
| H    | -0.034153 | 2.068828  | -2.131333 | C    | -0.536210 | -1.659692 | 2.476371  |
| H    | 1.528283  | 3.979679  | -0.366358 | H    | -1.317795 | -0.885770 | 2.483629  |
| H    | 0.723834  | 4.335881  | -1.899723 | H    | -0.694106 | -2.290369 | 3.359538  |
| H    | -0.441733 | 5.154365  | 0.448084  | H    | 0.431381  | -1.155963 | 2.598075  |
| H    | -1.468903 | 4.443972  | -0.813861 | H    | 0.236789  | -3.015070 | -1.451066 |
| H    | -1.921894 | 2.924299  | 1.052963  | C    | -0.428671 | -1.226974 | -2.397830 |
| H    | -0.220070 | 2.991558  | 1.584643  | H    | -0.461499 | -1.699860 | -3.386492 |
| Li   | 1.486537  | -0.889513 | 0.111808  | H    | -1.254526 | -0.498132 | -2.358481 |
| N    | 3.172123  | -0.107185 | 0.086603  | H    | 0.514166  | -0.673167 | -2.325483 |
| C    | 4.190495  | -0.630117 | -0.812129 | C    | -1.894589 | -3.025529 | -1.460779 |

**Table 2 (continued).**

|   |          |           |           |   |           |           |           |
|---|----------|-----------|-----------|---|-----------|-----------|-----------|
| H | 4.899759 | 0.161283  | -1.133400 | H | -1.956928 | -3.462767 | -2.465456 |
| C | 5.055888 | -1.752377 | -0.187374 | H | -2.012275 | -3.843485 | -0.742401 |
| H | 5.517601 | -1.424477 | 0.750723  | H | -2.747525 | -2.342387 | -1.335210 |

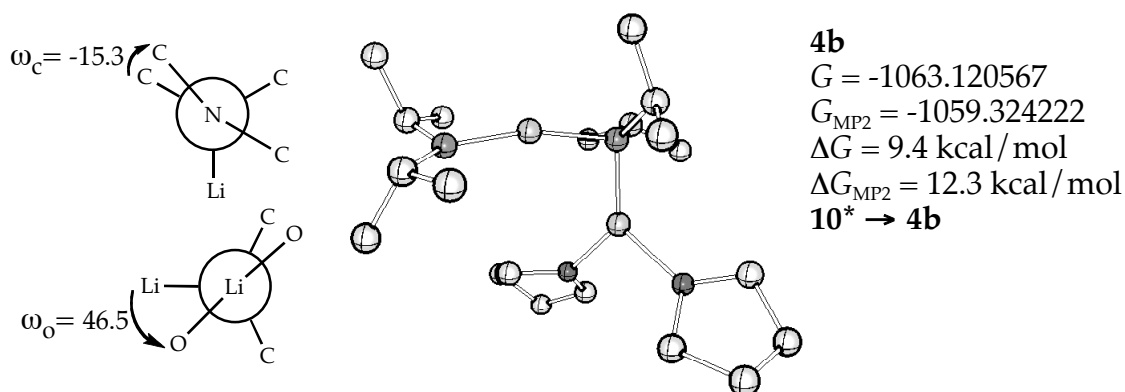

| Atom | X         | Y         | Z         | Atom | X         | Y         | Z         |
|------|-----------|-----------|-----------|------|-----------|-----------|-----------|
| C    | -3.052490 | 0.079073  | -2.158608 | H    | 2.480688  | -2.296775 | 2.332048  |
| N    | -2.945568 | -0.124926 | -0.720981 | C    | -0.467076 | -0.570685 | 2.989759  |
| Li   | -1.543941 | -1.024750 | 0.143024  | H    | -1.536162 | -0.712774 | 2.800384  |
| N    | 0.251114  | -1.606019 | 0.853742  | H    | -0.320001 | -0.557325 | 4.077030  |
| Li   | 1.235801  | -0.018706 | 0.231005  | H    | -0.193171 | 0.420631  | 2.602895  |
| O    | 0.746132  | 1.874179  | 0.396741  | H    | -0.010142 | -2.630984 | 2.706565  |
| C    | 1.465056  | 2.741014  | 1.310151  | C    | 0.602097  | -2.901437 | 0.243918  |
| C    | 0.579732  | 3.979316  | 1.519237  | C    | -0.525862 | -3.954211 | 0.350965  |
| C    | -0.820583 | 3.464856  | 1.146782  | H    | -1.401156 | -3.645811 | -0.238879 |
| C    | -0.511370 | 2.501696  | 0.008121  | H    | -0.203484 | -4.936334 | -0.021137 |
| H    | -0.352900 | 3.039937  | -0.936650 | H    | -0.852687 | -4.085587 | 1.388644  |
| H    | -1.258434 | 1.712654  | -0.146766 | C    | 0.985729  | -2.726549 | -1.232741 |
| H    | -1.504770 | 4.262418  | 0.843482  | H    | 1.846204  | -2.054726 | -1.344385 |
| H    | -1.274645 | 2.924216  | 1.985142  | H    | 1.246700  | -3.686816 | -1.694665 |
| H    | 0.881149  | 4.784619  | 0.839599  | H    | 0.153716  | -2.301596 | -1.806981 |
| H    | 0.644888  | 4.361643  | 2.542135  | H    | 1.485886  | -3.342484 | 0.745710  |
| H    | 1.622399  | 2.187715  | 2.243586  | C    | -4.211554 | 0.114840  | -0.041276 |
| H    | 2.442809  | 2.980993  | 0.878117  | C    | -3.992554 | 0.291960  | 1.467274  |
| O    | 3.060112  | 0.161525  | -0.492913 | H    | -3.292671 | 1.111561  | 1.671056  |
| C    | 4.209960  | -0.672552 | -0.196333 | H    | -4.932675 | 0.502023  | 1.993042  |
| C    | 5.348351  | -0.117265 | -1.052956 | H    | -3.577986 | -0.627920 | 1.906788  |
| C    | 4.595854  | 0.409884  | -2.284547 | C    | -5.262910 | -1.002688 | -0.256006 |
| C    | 3.321536  | 0.980604  | -1.660701 | H    | -4.910551 | -1.941016 | 0.193988  |
| H    | 2.449117  | 0.929572  | -2.318409 | H    | -6.231398 | -0.745580 | 0.197185  |
| H    | 3.456106  | 2.019450  | -1.335358 | H    | -5.438147 | -1.191223 | -1.320794 |
| H    | 4.351985  | -0.413525 | -2.965457 | H    | -4.688975 | 1.054739  | -0.391114 |

**Table 2 (continued).**

|   |          |           |           |   |           |           |           |
|---|----------|-----------|-----------|---|-----------|-----------|-----------|
| H | 5.155782 | 1.162553  | -2.846951 | C | -1.874966 | -0.581017 | -2.886707 |
| H | 6.094418 | -0.879276 | -1.295504 | H | -1.871606 | -1.664476 | -2.716602 |
| H | 5.856113 | 0.703808  | -0.533334 | H | -1.910229 | -0.405705 | -3.969723 |
| H | 4.396996 | -0.620543 | 0.879055  | H | -0.920311 | -0.173223 | -2.518753 |
| H | 3.965428 | -1.707566 | -0.462237 | C | -3.135448 | 1.566455  | -2.590858 |
| C | 0.372303 | -1.667534 | 2.321564  | H | -2.185214 | 2.081009  | -2.395670 |
| C | 1.834522 | -1.559252 | 2.821673  | H | -3.355834 | 1.664062  | -3.663593 |
| H | 2.243499 | -0.558275 | 2.610279  | H | -3.922070 | 2.098321  | -2.044152 |
| H | 1.910107 | -1.720007 | 3.905767  | H | -3.965078 | -0.400070 | -2.569689 |

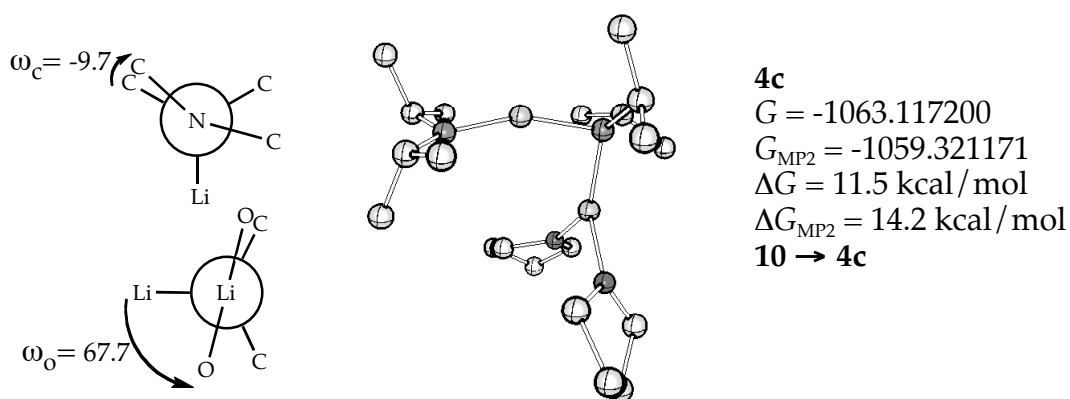

| Atom | X         | Y         | Z         | Atom | X         | Y         | Z         |
|------|-----------|-----------|-----------|------|-----------|-----------|-----------|
| C    | 2.312152  | -0.161294 | -2.482859 | H    | -1.900783 | 2.835830  | -0.424085 |
| N    | 2.515584  | -0.208852 | -1.041866 | C    | 1.187960  | 4.004118  | 0.664634  |
| Li   | 1.635958  | 0.949284  | 0.145295  | H    | 1.785507  | 3.928480  | 1.580629  |
| N    | 0.112899  | 1.786433  | 1.172560  | H    | 0.995469  | 5.070093  | 0.479790  |
| Li   | -1.117424 | 0.373718  | 0.532673  | H    | 1.800655  | 3.627229  | -0.167216 |
| O    | -2.653178 | 0.295854  | -0.732762 | H    | -0.732427 | 3.698528  | 1.556720  |
| C    | -3.926632 | -0.238159 | -0.298309 | C    | 0.274847  | 1.700904  | 2.636886  |
| C    | -4.648684 | -0.682271 | -1.572127 | C    | 1.193659  | 0.538959  | 3.036660  |
| C    | -4.095205 | 0.301761  | -2.614177 | H    | 0.854046  | -0.403284 | 2.588639  |
| C    | -2.638050 | 0.444745  | -2.176175 | H    | 1.227577  | 0.402467  | 4.125206  |
| H    | -2.005201 | -0.343419 | -2.602072 | H    | 2.221219  | 0.716450  | 2.696566  |
| H    | -2.197519 | 1.415981  | -2.409752 | C    | -1.076840 | 1.589816  | 3.381838  |
| H    | -4.185854 | -0.060114 | -3.642283 | H    | -1.754520 | 2.396813  | 3.079173  |
| H    | -4.612436 | 1.265678  | -2.544225 | H    | -0.957535 | 1.644442  | 4.473106  |
| H    | -4.370717 | -1.710401 | -1.831954 | H    | -1.570635 | 0.633016  | 3.152913  |
| H    | -5.736806 | -0.639920 | -1.468954 | H    | 0.757464  | 2.617844  | 3.021652  |
| H    | -4.476274 | 0.555603  | 0.223627  | C    | 3.732940  | -0.934788 | -0.701255 |
| H    | -3.731315 | -1.055580 | 0.401508  | C    | 5.027491  | -0.119463 | -0.945020 |
| O    | -1.039289 | -1.556339 | 1.032475  | H    | 5.068598  | 0.266478  | -1.969588 |



**Table 2 (continued).**

|   |           |           |           |   |          |           |           |
|---|-----------|-----------|-----------|---|----------|-----------|-----------|
| C | -1.444373 | -2.273759 | 2.222769  | H | 5.932108 | -0.723462 | -0.781906 |
| C | -1.112099 | -3.744469 | 1.958454  | H | 5.062259 | 0.742450  | -0.264335 |
| C | 0.093068  | -3.638492 | 1.011276  | C | 3.713012 | -1.394168 | 0.762509  |
| C | -0.277842 | -2.435135 | 0.148796  | H | 3.643509 | -0.530515 | 1.438569  |
| H | 0.579191  | -1.868331 | -0.235813 | H | 4.626805 | -1.940974 | 1.028070  |
| H | -0.928124 | -2.727251 | -0.686963 | H | 2.853107 | -2.044872 | 0.960440  |
| H | 1.010173  | -3.433665 | 1.575008  | H | 3.833551 | -1.858466 | -1.310023 |
| H | 0.255142  | -4.540990 | 0.414949  | C | 1.729564 | -1.468510 | -3.078741 |
| H | -0.894450 | -4.290114 | 2.881371  | H | 2.320434 | -2.339724 | -2.773866 |
| H | -1.949584 | -4.244784 | 1.457771  | H | 1.712249 | -1.447689 | -4.178265 |
| H | -2.511033 | -2.091526 | 2.393234  | H | 0.699489 | -1.623535 | -2.727221 |
| H | -0.881914 | -1.878277 | 3.076262  | C | 1.397751 | 1.008767  | -2.866172 |
| C | -0.121170 | 3.191209  | 0.785983  | H | 0.425980 | 0.910166  | -2.359730 |
| C | -0.913459 | 3.302786  | -0.522786 | H | 1.201814 | 1.044818  | -3.945846 |
| H | -0.379797 | 2.809994  | -1.345394 | H | 1.840824 | 1.966155  | -2.565450 |
| H | -1.061018 | 4.351405  | -0.810250 | H | 3.266975 | 0.013440  | -3.019569 |

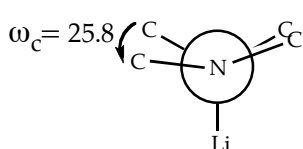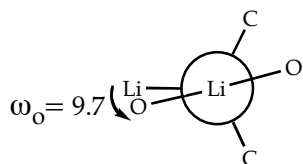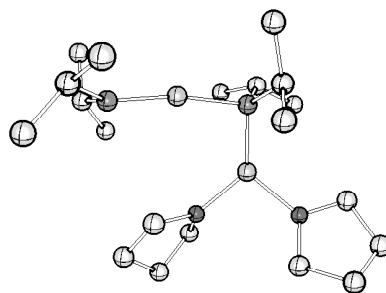

**4d**

$G = -1063.119115$   
 $G_{\text{MP2}} = -1059.323269$   
 $\Delta G = 10.3 \text{ kcal/mol}$   
 $\Delta G_{\text{MP2}} = 12.9 \text{ kcal/mol}$

| Atom | X         | Y         | Z         | Atom | X         | Y         | Z         |
|------|-----------|-----------|-----------|------|-----------|-----------|-----------|
| C    | -3.746713 | -0.163010 | -1.560314 | H    | 2.620118  | -3.018853 | 1.441428  |
| N    | -3.055397 | -0.105518 | -0.278875 | C    | -0.427054 | -1.847975 | 2.638457  |
| Li   | -1.467832 | -1.067975 | 0.023677  | H    | -1.483278 | -1.908333 | 2.347104  |
| N    | 0.401932  | -1.772920 | 0.312692  | H    | -0.330151 | -2.334846 | 3.616547  |
| Li   | 1.292315  | -0.014437 | 0.310747  | H    | -0.176278 | -0.785324 | 2.772456  |
| O    | 0.525152  | 1.769805  | 0.346420  | H    | 0.135943  | -3.540163 | 1.478991  |
| C    | 0.694816  | 2.698195  | 1.436838  | C    | 0.890564  | -2.585542 | -0.813480 |
| C    | 0.357206  | 4.061651  | 0.840733  | C    | -0.059042 | -3.732837 | -1.227449 |
| C    | -0.807812 | 3.709701  | -0.100265 | H    | -1.006998 | -3.332891 | -1.609487 |
| C    | -0.457220 | 2.302019  | -0.604817 | H    | 0.385228  | -4.356459 | -2.015083 |
| H    | 0.033635  | 2.322417  | -1.585075 | H    | -0.290732 | -4.388947 | -0.381680 |
| H    | -1.321944 | 1.624122  | -0.627675 | C    | 1.153128  | -1.688083 | -2.034550 |
| H    | -0.923184 | 4.423250  | -0.921108 | H    | 1.936214  | -0.944128 | -1.830158 |

**Table 2 (continued).**

|   |           |           |           |   |           |           |           |
|---|-----------|-----------|-----------|---|-----------|-----------|-----------|
| H | -1.750455 | 3.685725  | 0.456362  | H | 1.479560  | -2.273192 | -2.902742 |
| H | 1.213381  | 4.450482  | 0.276268  | H | 0.241590  | -1.149367 | -2.325661 |
| H | 0.087635  | 4.797722  | 1.604081  | H | 1.860006  | -3.065397 | -0.566875 |
| H | 0.006248  | 2.436207  | 2.251115  | C | -3.962714 | 0.301903  | 0.787274  |
| H | 1.724390  | 2.605056  | 1.796192  | C | -3.210010 | 0.985134  | 1.939757  |
| O | 3.225110  | 0.406603  | 0.126052  | H | -2.719531 | 1.902616  | 1.593691  |
| C | 4.279895  | -0.596033 | 0.139272  | H | -3.883765 | 1.248208  | 2.765917  |
| C | 5.512152  | 0.079163  | -0.472973 | H | -2.435106 | 0.322291  | 2.347365  |
| C | 4.889744  | 1.156952  | -1.373895 | C | -4.800485 | -0.872609 | 1.350784  |
| C | 3.693871  | 1.604686  | -0.537877 | H | -4.144842 | -1.597266 | 1.853773  |
| H | 2.862263  | 2.010886  | -1.117558 | H | -5.559335 | -0.538184 | 2.074152  |
| H | 3.989242  | 2.342165  | 0.220726  | H | -5.318547 | -1.401410 | 0.542649  |
| H | 4.550313  | 0.720463  | -2.320350 | H | -4.696061 | 1.049576  | 0.421441  |
| H | 5.573441  | 1.979984  | -1.601288 | C | -3.010632 | -1.084644 | -2.541637 |
| H | 6.141815  | -0.629400 | -1.018374 | H | -2.962928 | -2.109185 | -2.151797 |
| H | 6.124995  | 0.543989  | 0.307934  | H | -3.500133 | -1.116660 | -3.523616 |
| H | 4.429821  | -0.924913 | 1.170323  | H | -1.981396 | -0.730201 | -2.703501 |
| H | 3.936518  | -1.449091 | -0.455213 | C | -3.941854 | 1.224071  | -2.224768 |
| C | 0.487874  | -2.498141 | 1.592189  | H | -2.971580 | 1.647226  | -2.519840 |
| C | 1.920081  | -2.591517 | 2.168203  | H | -4.571720 | 1.164843  | -3.124452 |
| H | 2.288223  | -1.593202 | 2.449235  | H | -4.417830 | 1.929223  | -1.533621 |
| H | 1.954654  | -3.221795 | 3.067013  | H | -4.765496 | -0.590721 | -1.448275 |

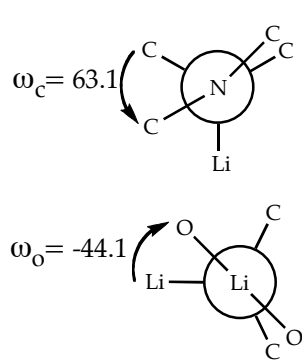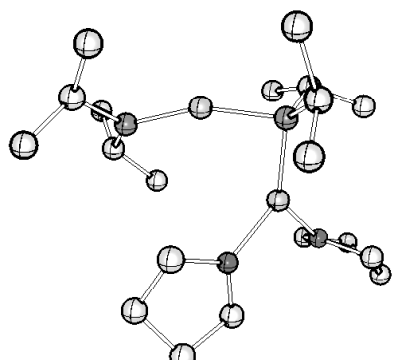

**4e**  
 $G = -1063.119655$   
 $G_{\text{MP2}} = -1059.324365$   
 $\Delta G = 9.9 \text{ kcal/mol}$   
 $\Delta G_{\text{MP2}} = 12.2 \text{ kcal/mol}$

| Atom | X         | Y         | Z         | Atom | X         | Y         | Z         |
|------|-----------|-----------|-----------|------|-----------|-----------|-----------|
| C    | -2.736853 | 0.672998  | 2.001700  | H    | 2.699703  | -3.290804 | -0.747489 |
| N    | -2.802689 | -0.114503 | 0.781804  | C    | 0.488986  | -2.563597 | 1.835718  |
| Li   | -1.462388 | -1.241467 | 0.136308  | H    | -0.597666 | -2.527788 | 1.989104  |
| N    | 0.328772  | -1.864973 | -0.535642 | H    | 0.894099  | -3.311227 | 2.528734  |
| Li   | 1.102309  | -0.040092 | -0.436232 | H    | 0.896129  | -1.585898 | 2.130607  |
| O    | 0.425706  | 1.732392  | -0.963894 | H    | 0.399134  | -3.876387 | 0.165656  |
| C    | -0.948053 | 2.033114  | -1.364257 | C    | 0.276527  | -2.373699 | -1.918641 |

**Table 2 (continued).**

|   |           |           |           |   |           |           |           |
|---|-----------|-----------|-----------|---|-----------|-----------|-----------|
| C | -1.119561 | 3.523792  | -1.089621 | C | -0.896327 | -3.345079 | -2.185476 |
| C | 0.284926  | 4.070938  | -1.385128 | H | -1.859543 | -2.822746 | -2.112420 |
| C | 1.186819  | 2.957396  | -0.845334 | H | -0.833646 | -3.787952 | -3.188853 |
| H | 1.429125  | 3.113615  | 0.213115  | H | -0.906863 | -4.169306 | -1.463597 |
| H | 2.121058  | 2.846899  | -1.404948 | C | 0.200682  | -1.213778 | -2.921971 |
| H | 0.489469  | 5.034436  | -0.908211 | H | 1.089980  | -0.569149 | -2.866709 |
| H | 0.428291  | 4.190188  | -2.465594 | H | 0.127308  | -1.579222 | -3.953417 |
| H | -1.387934 | 3.688630  | -0.039836 | H | -0.681238 | -0.589031 | -2.729285 |
| H | -1.897836 | 3.972312  | -1.713619 | H | 1.199560  | -2.933372 | -2.163815 |
| H | -1.047430 | 1.809135  | -2.434080 | C | -4.150539 | -0.198882 | 0.237229  |
| H | -1.614671 | 1.386081  | -0.779463 | C | -4.249468 | -1.368636 | -0.752261 |
| O | 2.914101  | 0.484991  | 0.215997  | H | -4.012031 | -2.319245 | -0.256749 |
| C | 3.241011  | 0.781669  | 1.595618  | H | -5.251925 | -1.454453 | -1.190532 |
| C | 4.718256  | 0.421262  | 1.751078  | H | -3.543457 | -1.227366 | -1.585121 |
| C | 5.273285  | 0.738216  | 0.353269  | C | -4.631419 | 1.094934  | -0.467453 |
| C | 4.125304  | 0.297755  | -0.558565 | H | -4.038899 | 1.281441  | -1.373834 |
| H | 4.200013  | -0.761998 | -0.827837 | H | -5.688262 | 1.029806  | -0.763108 |
| H | 4.041923  | 0.892088  | -1.473972 | H | -4.527240 | 1.967380  | 0.187972  |
| H | 6.204776  | 0.211062  | 0.128404  | H | -4.900013 | -0.407363 | 1.028135  |
| H | 5.457778  | 1.813802  | 0.249324  | C | -1.280115 | 1.040903  | 2.328259  |
| H | 4.829047  | -0.645574 | 1.975249  | H | -0.816751 | 1.592640  | 1.501431  |
| H | 5.203574  | 0.990865  | 2.548738  | H | -1.211155 | 1.655853  | 3.235120  |
| H | 3.062592  | 1.849377  | 1.777274  | H | -0.688589 | 0.131372  | 2.503865  |
| H | 2.573089  | 0.198157  | 2.234838  | C | -3.353042 | -0.026185 | 3.239471  |
| C | 0.854556  | -2.891206 | 0.381346  | H | -2.785913 | -0.936111 | 3.477596  |
| C | 2.384188  | -3.099601 | 0.284486  | H | -3.347276 | 0.627193  | 4.124201  |
| H | 2.911010  | -2.204067 | 0.638779  | H | -4.391768 | -0.321954 | 3.056753  |
| H | 2.715702  | -3.951798 | 0.893337  | H | -3.279033 | 1.638548  | 1.897268  |

**Table 2 (continued).**

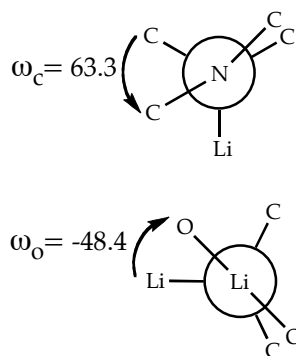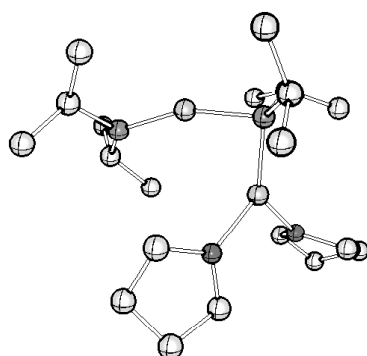

**4f**

$G = -1063.120314$   
 $G_{\text{MP2}} = -1059.325333$   
 $\Delta G = 9.5 \text{ kcal/mol}$   
 $\Delta G_{\text{MP2}} = 11.6 \text{ kcal/mol}$

| Atom | X         | Y         | Z         | Atom | X         | Y         | Z         |
|------|-----------|-----------|-----------|------|-----------|-----------|-----------|
| C    | -2.573179 | 0.747003  | 2.056481  | H    | 2.667385  | -3.326237 | -0.814948 |
| N    | -2.720673 | -0.065884 | 0.860757  | C    | 0.519841  | -2.584895 | 1.817128  |
| Li   | -1.451567 | -1.247665 | 0.169199  | H    | -0.562935 | -2.545081 | 1.995585  |
| N    | 0.304397  | -1.903488 | -0.558130 | H    | 0.938342  | -3.330948 | 2.503943  |
| Li   | 1.072551  | -0.074862 | -0.492683 | H    | 0.937020  | -1.607698 | 2.098031  |
| O    | 0.411867  | 1.676606  | -1.107095 | H    | 0.390488  | -3.908274 | 0.157752  |
| C    | 1.201913  | 2.888719  | -1.105183 | C    | 0.202052  | -2.437410 | -1.928926 |
| C    | 0.290083  | 3.991327  | -1.652616 | C    | -1.002453 | -3.382995 | -2.142581 |
| C    | -1.106175 | 3.486090  | -1.258521 | H    | -1.949165 | -2.832264 | -2.060123 |
| C    | -0.971690 | 1.981050  | -1.465294 | H    | -0.977180 | -3.852972 | -3.135231 |
| H    | -1.120727 | 1.707222  | -2.517765 | H    | -1.016953 | -4.187431 | -1.398761 |
| H    | -1.621880 | 1.373664  | -0.822231 | C    | 0.130001  | -1.299098 | -2.956539 |
| H    | -1.908256 | 3.917424  | -1.864227 | H    | 1.034609  | -0.674599 | -2.934624 |
| H    | -1.316961 | 3.708033  | -0.206058 | H    | 0.024445  | -1.686239 | -3.977311 |
| H    | 0.378214  | 4.054557  | -2.743571 | H    | -0.732964 | -0.650175 | -2.758752 |
| H    | 0.534707  | 4.973183  | -1.235939 | H    | 1.103578  | -3.026329 | -2.184527 |
| H    | 1.512793  | 3.096750  | -0.074116 | C    | -4.101236 | -0.154088 | 0.406006  |
| H    | 2.097681  | 2.727079  | -1.713662 | C    | -4.268368 | -1.343808 | -0.550427 |
| O    | 2.847890  | 0.477261  | 0.225551  | H    | -4.005656 | -2.286144 | -0.051517 |
| C    | 4.101837  | 0.257038  | -0.466713 | H    | -5.296941 | -1.432350 | -0.922512 |
| C    | 5.175012  | 0.222065  | 0.622949  | H    | -3.616117 | -1.224153 | -1.429307 |
| C    | 4.582949  | 1.154222  | 1.691911  | C    | -4.620197 | 1.126936  | -0.294715 |
| C    | 3.093191  | 0.820894  | 1.612714  | H    | -4.085780 | 1.289943  | -1.240851 |
| H    | 2.435325  | 1.653585  | 1.876933  | H    | -5.694089 | 1.062231  | -0.520776 |
| H    | 2.836464  | -0.043225 | 2.237209  | H    | -4.469614 | 2.012867  | 0.332899  |
| H    | 4.756870  | 2.203604  | 1.426551  | H    | -4.798910 | -0.342084 | 1.247970  |
| H    | 4.993787  | 0.982585  | 2.690827  | C    | -1.099312 | 1.129947  | 2.270119  |
| H    | 6.151634  | 0.548875  | 0.254599  | H    | -0.702980 | 1.674067  | 1.404431  |
| H    | 5.281431  | -0.793985 | 1.019347  | H    | -0.968714 | 1.757019  | 3.161937  |
| H    | 4.020374  | -0.676308 | -1.030703 | H    | -0.489682 | 0.226429  | 2.413003  |
| H    | 4.261065  | 1.086552  | -1.167860 | C    | -3.095299 | 0.069288  | 3.348057  |

**Table 2 (continued).**

|   |          |           |          |   |           |           |          |
|---|----------|-----------|----------|---|-----------|-----------|----------|
| C | 0.850722 | -2.921766 | 0.356325 | H | -2.507843 | -0.833716 | 3.561948 |
| C | 2.377689 | -3.129758 | 0.223626 | H | -3.030633 | 0.739120  | 4.218076 |
| H | 2.911588 | -2.231780 | 0.560734 | H | -4.142731 | -0.233932 | 3.244544 |
| H | 2.725458 | -3.978213 | 0.828735 | H | -3.127919 | 1.707048  | 1.971934 |

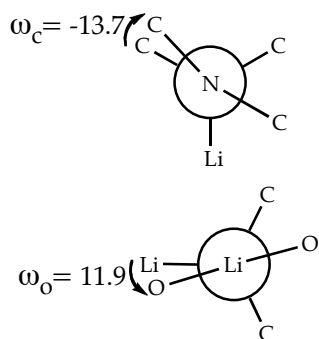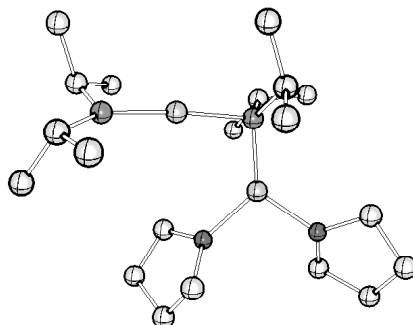

**4g**  
 $G = -1063.121261$   
 $G_{\text{MP2}} = -1059.324248$   
 $\Delta G = 8.9 \text{ kcal/mol}$   
 $\Delta G_{\text{MP2}} = 12.3 \text{ kcal/mol}$

| Atom | X         | Y         | Z         | Atom | X         | Y         | Z         |
|------|-----------|-----------|-----------|------|-----------|-----------|-----------|
| C    | 4.239235  | -0.301231 | -0.707950 | H    | -1.651012 | -4.123563 | -0.809332 |
| N    | 3.152230  | 0.059435  | 0.190363  | C    | -0.206983 | -1.437550 | -2.479179 |
| Li   | 1.535220  | -0.859754 | 0.128198  | H    | 0.675276  | -0.795547 | -2.377779 |
| N    | -0.288367 | -1.704288 | -0.043741 | H    | -0.134737 | -1.950044 | -3.445801 |
| Li   | -1.327303 | -0.063266 | -0.093525 | H    | -1.097487 | -0.789644 | -2.522360 |
| O    | -3.277589 | 0.114987  | 0.052386  | H    | 0.553352  | -3.121993 | -1.418478 |
| C    | -4.106565 | 1.029949  | -0.692724 | C    | -0.479893 | -2.556700 | 1.138443  |
| C    | -5.492619 | 1.010064  | -0.004726 | C    | 0.638560  | -3.599124 | 1.362795  |
| C    | -5.395597 | -0.162767 | 1.005802  | H    | 1.609192  | -3.106245 | 1.517270  |
| C    | -4.151450 | -0.921015 | 0.541589  | H    | 0.434511  | -4.221364 | 2.244116  |
| H    | -4.379870 | -1.620367 | -0.274909 | H    | 0.741346  | -4.270123 | 0.502875  |
| H    | -3.618164 | -1.456963 | 1.328106  | C    | -0.608789 | -1.675380 | 2.390945  |
| H    | -6.288504 | -0.794220 | 1.010083  | H    | -1.447484 | -0.968566 | 2.302894  |
| H    | -5.244240 | 0.215034  | 2.021871  | H    | -0.784414 | -2.279624 | 3.289205  |
| H    | -6.284527 | 0.844634  | -0.740999 | H    | 0.302105  | -1.087549 | 2.560695  |
| H    | -5.707074 | 1.955416  | 0.501038  | H    | -1.424592 | -3.131954 | 1.071108  |
| H    | -3.610703 | 2.002076  | -0.675963 | C    | 3.595759  | 0.905832  | 1.283971  |
| H    | -4.171032 | 0.685641  | -1.733758 | C    | 2.583067  | 0.868134  | 2.436938  |
| O    | -0.701246 | 1.771197  | -0.315600 | H    | 2.499876  | -0.145390 | 2.848067  |
| C    | -0.909435 | 2.840205  | 0.626381  | H    | 2.859726  | 1.546795  | 3.254380  |
| C    | -0.747835 | 4.107892  | -0.206616 | H    | 1.587482  | 1.172576  | 2.077326  |
| C    | 0.419885  | 3.730202  | -1.139807 | C    | 3.842938  | 2.381916  | 0.879667  |
| C    | 0.311137  | 2.197639  | -1.282267 | H    | 2.895203  | 2.862741  | 0.600683  |
| H    | 1.253600  | 1.685779  | -1.050902 | H    | 4.291045  | 2.963412  | 1.698610  |
| H    | -0.048615 | 1.883190  | -2.265787 | H    | 4.516160  | 2.449899  | 0.017973  |
| H    | 1.376950  | 3.997922  | -0.681612 | H    | 4.556476  | 0.549971  | 1.711910  |

**Table 2 (continued).**

|   |           |           |           |   |          |           |           |
|---|-----------|-----------|-----------|---|----------|-----------|-----------|
| H | 0.361195  | 4.238105  | -2.106587 | C | 3.684339 | -0.779817 | -2.057327 |
| H | -0.537725 | 4.990021  | 0.405443  | H | 3.088601 | 0.007048  | -2.535570 |
| H | -1.662544 | 4.298846  | -0.780285 | H | 4.485152 | -1.073648 | -2.748060 |
| H | -1.902831 | 2.705086  | 1.063882  | H | 3.038494 | -1.661109 | -1.920469 |
| H | -0.156141 | 2.783999  | 1.423735  | C | 5.178140 | -1.393343 | -0.137939 |
| C | -0.316613 | -2.439636 | -1.318945 | H | 4.622792 | -2.332041 | -0.005501 |
| C | -1.564804 | -3.320160 | -1.548106 | H | 6.034297 | -1.588274 | -0.800263 |
| H | -2.480137 | -2.713394 | -1.492195 | H | 5.577682 | -1.104077 | 0.840559  |
| H | -1.530695 | -3.791042 | -2.538773 | H | 4.887043 | 0.571453  | -0.936778 |

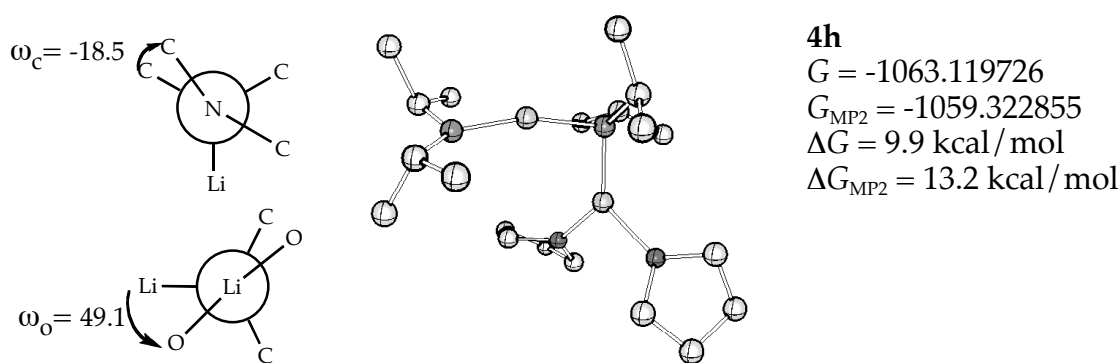

| Atom | X         | Y         | Z         | Atom | X         | Y         | Z         |
|------|-----------|-----------|-----------|------|-----------|-----------|-----------|
| C    | 3.068149  | -0.324413 | -2.138269 | H    | -2.357427 | 2.554031  | 2.174782  |
| N    | 2.962459  | -0.054140 | -0.711733 | C    | 0.406735  | 0.583922  | 2.932637  |
| Li   | 1.617746  | 0.962670  | 0.107801  | H    | 1.487757  | 0.621136  | 2.761031  |
| N    | -0.151934 | 1.665676  | 0.770461  | H    | 0.239906  | 0.603136  | 4.016936  |
| Li   | -1.201055 | 0.142133  | 0.105035  | H    | 0.044641  | -0.382140 | 2.555674  |
| O    | -0.853890 | -1.780161 | 0.340838  | H    | 0.137695  | 2.674133  | 2.627359  |
| C    | -1.730396 | -2.660724 | 1.065267  | C    | -0.372442 | 2.984898  | 0.148964  |
| C    | -0.828077 | -3.422781 | 2.052990  | C    | 0.842126  | 3.933352  | 0.282297  |
| C    | 0.593589  | -3.297266 | 1.437018  | H    | 1.699861  | 3.548776  | -0.288632 |
| C    | 0.375579  | -2.521850 | 0.130257  | H    | 0.616532  | 4.939521  | -0.096834 |
| H    | 0.222902  | -3.202345 | -0.719576 | H    | 1.156053  | 4.036882  | 1.327130  |
| H    | 1.169284  | -1.805393 | -0.114320 | C    | -0.734198 | 2.839854  | -1.336265 |
| H    | 1.057482  | -4.269675 | 1.249408  | H    | -1.651003 | 2.251815  | -1.467757 |
| H    | 1.254595  | -2.737367 | 2.104437  | H    | -0.891850 | 3.818321  | -1.806542 |
| H    | -1.150903 | -4.462673 | 2.159230  | H    | 0.067987  | 2.335703  | -1.888805 |
| H    | -0.863496 | -2.962487 | 3.044469  | H    | -1.224836 | 3.504246  | 0.628666  |
| H    | -2.499406 | -2.046722 | 1.540544  | C    | 4.209105  | -0.325851 | -0.008766 |
| H    | -2.215027 | -3.347815 | 0.355871  | C    | 3.967090  | -0.419153 | 1.503922  |
| O    | -3.004993 | 0.036645  | -0.692646 | H    | 3.231203  | -1.197983 | 1.738021  |
| C    | -4.099119 | 0.964568  | -0.569730 | H    | 4.891502  | -0.642030 | 2.051724  |

**Table 2 (continued).**

|   |           |           |           |   |          |           |           |
|---|-----------|-----------|-----------|---|----------|-----------|-----------|
| C | -5.345452 | 0.115094  | -0.837062 | H | 3.586651 | 0.537865  | 1.893051  |
| C | -4.842134 | -0.964966 | -1.833628 | C | 5.317277 | 0.726419  | -0.263604 |
| C | -3.306710 | -0.792683 | -1.833751 | H | 5.009531 | 1.700752  | 0.140449  |
| H | -2.959386 | -0.284629 | -2.743462 | H | 6.268256 | 0.441994  | 0.209721  |
| H | -2.746567 | -1.720937 | -1.711380 | H | 5.509452 | 0.857494  | -1.334063 |
| H | -5.248441 | -0.816497 | -2.838120 | H | 4.640926 | -1.304185 | -0.308531 |
| H | -5.131841 | -1.967352 | -1.506765 | C | 1.929942 | 0.364191  | -2.901798 |
| H | -6.168813 | 0.711741  | -1.239607 | H | 1.983256 | 1.452518  | -2.777549 |
| H | -5.691169 | -0.348890 | 0.091868  | H | 1.960425 | 0.141335  | -3.976146 |
| H | -4.047444 | 1.401482  | 0.428702  | H | 0.953436 | 0.023242  | -2.522734 |
| H | -3.983708 | 1.762695  | -1.316569 | C | 3.077529 | -1.830993 | -2.506124 |
| C | -0.313373 | 1.744431  | 2.233533  | H | 2.103231 | -2.288546 | -2.289488 |
| C | -1.794629 | 1.763888  | 2.685222  | H | 3.292295 | -1.985346 | -3.573273 |
| H | -2.280349 | 0.801235  | 2.458542  | H | 3.837331 | -2.376753 | -1.935610 |
| H | -1.893169 | 1.933155  | 3.766170  | H | 4.006422 | 0.089897  | -2.561827 |

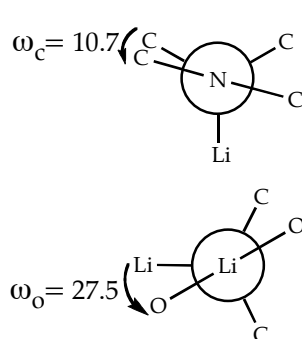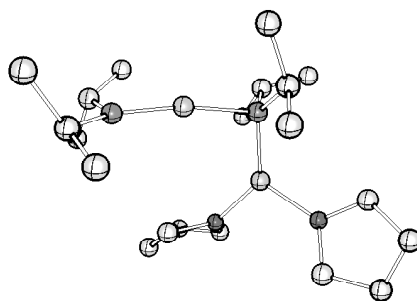

**4i**  
 $G = -1063.120663$   
 $G_{\text{MP2}} = -1059.324724$   
 $\Delta G = 9.3 \text{ kcal/mol}$   
 $\Delta G_{\text{MP2}} = 12.0 \text{ kcal/mol}$   
 (example of heterochiral form)

| Atom | X         | Y         | Z         | Atom | X         | Y         | Z         |
|------|-----------|-----------|-----------|------|-----------|-----------|-----------|
| C    | -3.529909 | -0.237119 | -1.835938 | H    | 1.881984  | -1.523996 | -1.686577 |
| N    | -3.028684 | -0.331829 | -0.474045 | C    | -0.167800 | -3.834433 | -0.074133 |
| Li   | -1.403610 | -1.045648 | 0.077089  | H    | -0.347463 | -4.159861 | 0.956593  |
| N    | 0.488343  | -1.491439 | 0.641564  | H    | 0.176936  | -4.708934 | -0.641587 |
| Li   | 1.323260  | 0.202957  | 0.166197  | H    | -1.135112 | -3.525424 | -0.496962 |
| O    | 3.227788  | 0.455816  | -0.240753 | H    | 1.818488  | -3.110452 | 0.221333  |
| C    | 4.213830  | -0.569054 | 0.046023  | C    | 0.401374  | -1.729990 | 2.093750  |
| C    | 5.205626  | -0.505431 | -1.113321 | C    | 0.238115  | -0.382069 | 2.814858  |
| C    | 5.210112  | 0.995806  | -1.441874 | H    | 1.169775  | 0.202326  | 2.755687  |
| C    | 3.742463  | 1.381364  | -1.232192 | H    | 0.008035  | -0.519069 | 3.878077  |
| H    | 3.154648  | 1.261791  | -2.150428 | H    | -0.566069 | 0.217538  | 2.371812  |
| H    | 3.606282  | 2.400223  | -0.859520 | C    | 1.603167  | -2.470365 | 2.719178  |
| H    | 5.555140  | 1.217220  | -2.455893 | H    | 1.706232  | -3.493386 | 2.343820  |

**Table 2 (continued).**

|   |           |           |           |   |           |           |           |
|---|-----------|-----------|-----------|---|-----------|-----------|-----------|
| H | 5.853324  | 1.537625  | -0.738763 | H | 1.492032  | -2.532508 | 3.808994  |
| H | 4.833816  | -1.085171 | -1.966050 | H | 2.539528  | -1.936555 | 2.503476  |
| H | 6.191948  | -0.891783 | -0.840879 | H | -0.492425 | -2.334502 | 2.359092  |
| H | 4.696530  | -0.333872 | 1.003431  | C | -4.044664 | 0.012198  | 0.510276  |
| H | 3.684813  | -1.519635 | 0.138555  | C | -3.748983 | -0.660416 | 1.859545  |
| O | 0.638650  | 2.034834  | 0.046550  | H | -3.739250 | -1.752013 | 1.752736  |
| C | 0.998813  | 3.031507  | 1.025187  | H | -4.491179 | -0.395034 | 2.623812  |
| C | -0.299600 | 3.773888  | 1.324983  | H | -2.767338 | -0.345846 | 2.244720  |
| C | -0.963950 | 3.814801  | -0.061137 | C | -4.204796 | 1.538639  | 0.724306  |
| C | -0.552811 | 2.474284  | -0.685151 | H | -3.296554 | 1.952289  | 1.185319  |
| H | -0.285733 | 2.564526  | -1.743386 | H | -5.056474 | 1.781147  | 1.376650  |
| H | -1.320818 | 1.699500  | -0.568290 | H | -4.361808 | 2.051218  | -0.232301 |
| H | -0.573492 | 4.656699  | -0.644483 | H | -5.044295 | -0.354552 | 0.204014  |
| H | -2.051298 | 3.913680  | -0.006354 | C | -2.372432 | -0.236263 | -2.844617 |
| H | -0.127594 | 4.766364  | 1.752359  | H | -1.682759 | 0.596117  | -2.662608 |
| H | -0.909484 | 3.195300  | 2.027662  | H | -2.734560 | -0.159761 | -3.877746 |
| H | 1.429467  | 2.515135  | 1.887753  | H | -1.802991 | -1.173687 | -2.768380 |
| H | 1.757407  | 3.705889  | 0.600995  | C | -4.505718 | -1.376945 | -2.223582 |
| C | 0.860890  | -2.681785 | -0.135765 | H | -3.979604 | -2.340669 | -2.199684 |
| C | 1.095167  | -2.286039 | -1.601749 | H | -4.922362 | -1.233827 | -3.231344 |
| H | 0.183124  | -1.874889 | -2.053513 | H | -5.348161 | -1.442398 | -1.526415 |
| H | 1.401563  | -3.149138 | -2.205161 | H | -4.085688 | 0.712663  | -2.001332 |

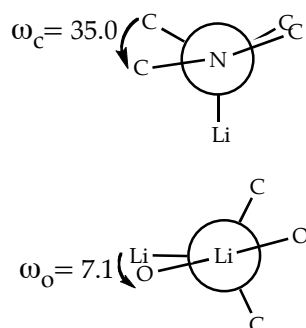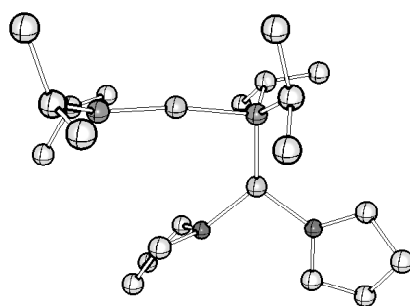

**4j**  
 $G = -1063.12036$   
 $G_{\text{MP2}} = -1059.324244$   
 $\Delta G = 9.5 \text{ kcal/mol}$   
 $\Delta G_{\text{MP2}} = 12.3 \text{ kcal/mol}$   
 (example of heterochiral form)

| Atom | X         | Y         | Z         | Atom | X         | Y         | Z         |
|------|-----------|-----------|-----------|------|-----------|-----------|-----------|
| C    | -3.822883 | -0.419648 | -1.400362 | H    | 1.768704  | -1.078627 | -1.925176 |
| N    | -3.079414 | -0.194724 | -0.167119 | C    | -0.230629 | -3.715896 | -0.822635 |
| Li   | -1.423501 | -0.997980 | 0.185830  | H    | -0.333991 | -4.299482 | 0.098911  |
| N    | 0.494753  | -1.636388 | 0.432405  | H    | 0.061938  | -4.408902 | -1.622504 |
| Li   | 1.378233  | 0.086923  | 0.223731  | H    | -1.223220 | -3.316078 | -1.073411 |
| O    | 3.284970  | 0.433162  | -0.021492 | H    | 1.776748  | -3.076749 | -0.488672 |



**Table 2 (continued).**

|   |           |           |           |   |           |           |           |
|---|-----------|-----------|-----------|---|-----------|-----------|-----------|
| C | 4.280447  | -0.622899 | -0.045559 | C | 0.545412  | -2.242670 | 1.774726  |
| C | 5.385514  | -0.113282 | -0.968939 | C | 0.394887  | -1.136430 | 2.829624  |
| C | 5.345386  | 1.399993  | -0.705116 | H | 1.263171  | -0.458931 | 2.808914  |
| C | 3.845295  | 1.661546  | -0.551559 | H | 0.329424  | -1.552043 | 3.842238  |
| H | 3.368124  | 1.870826  | -1.516521 | H | -0.506374 | -0.537219 | 2.659974  |
| H | 3.607677  | 2.474751  | 0.138957  | C | 1.821653  | -3.051316 | 2.094275  |
| H | 5.789128  | 1.993207  | -1.509838 | H | 1.933718  | -3.928284 | 1.448707  |
| H | 5.874098  | 1.639167  | 0.224921  | H | 1.798980  | -3.411290 | 3.130518  |
| H | 5.140019  | -0.327452 | -2.015675 | H | 2.717468  | -2.426309 | 1.972529  |
| H | 6.355745  | -0.566482 | -0.746499 | H | -0.299735 | -2.945156 | 1.938907  |
| H | 4.647012  | -0.780803 | 0.976266  | C | -3.918676 | 0.412652  | 0.855019  |
| H | 3.790783  | -1.536379 | -0.389881 | C | -3.341363 | 0.176009  | 2.256617  |
| O | 0.582813  | 1.876776  | 0.069088  | H | -3.248088 | -0.897348 | 2.464333  |
| C | 0.206246  | 2.654966  | 1.224164  | H | -3.965738 | 0.624623  | 3.040061  |
| C | -0.282713 | 4.010505  | 0.675985  | H | -2.341835 | 0.628564  | 2.341997  |
| C | -0.561939 | 3.737657  | -0.827436 | C | -4.144609 | 1.933988  | 0.656459  |
| C | -0.370561 | 2.223272  | -0.972830 | H | -3.199581 | 2.479746  | 0.787256  |
| H | 0.073891  | 1.919676  | -1.924373 | H | -4.872997 | 2.340130  | 1.373318  |
| H | -1.301901 | 1.663369  | -0.804563 | H | -4.516753 | 2.150089  | -0.351344 |
| H | 0.150274  | 4.282481  | -1.455150 | H | -4.931425 | -0.040223 | 0.867120  |
| H | -1.570461 | 4.037574  | -1.124993 | C | -2.873787 | -0.596200 | -2.593633 |
| H | 0.478721  | 4.786282  | 0.798850  | H | -2.231173 | 0.283282  | -2.721465 |
| H | -1.179946 | 4.339822  | 1.207192  | H | -3.423842 | -0.757863 | -3.529587 |
| H | -0.593258 | 2.132962  | 1.763567  | H | -2.227006 | -1.472407 | -2.445222 |
| H | 1.085656  | 2.726644  | 1.870035  | C | -4.770280 | -1.643844 | -1.337054 |
| C | 0.801132  | -2.578349 | -0.654485 | H | -4.183805 | -2.564907 | -1.216386 |
| C | 0.947097  | -1.808172 | -1.977300 | H | -5.381338 | -1.740044 | -2.246627 |
| H | 0.028261  | -1.262998 | -2.226582 | H | -5.455850 | -1.574388 | -0.485089 |
| H | 1.166359  | -2.484405 | -2.812448 | H | -4.465192 | 0.451733  | -1.648788 |

**Table 3.** Optimized geometries of THF trisolvated LDA open dimers at the B3LYP level of theory with 6-31G(d) basis set at -78 °C with free energies (Hartrees) and cartesian coordinates (X, Y, Z). Single point MP2 energies are included. A representative image is shown below. Dihedral angles  $\omega_C$  and  $\omega_O$  are included as described in Table 2. The connectivity of transition states and ground states is indicated beneath the energy values. Comments on geometry are included where deemed appropriate.

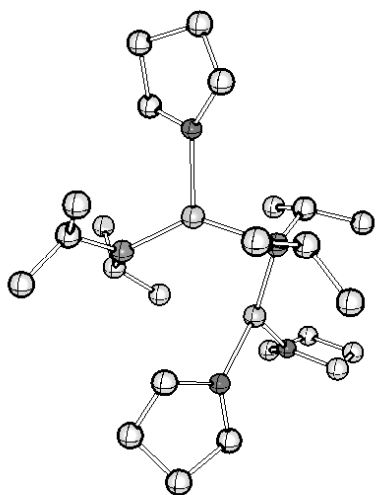

Table 3 (continued).

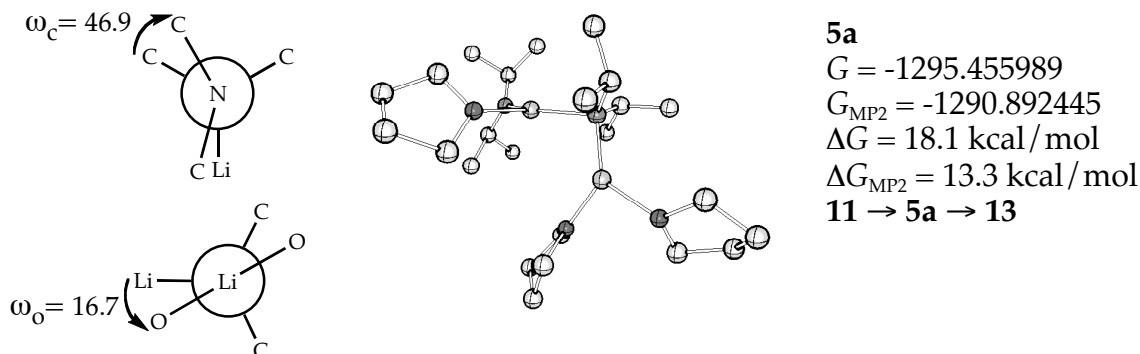

| Atom | X         | Y         | Z         | Atom | X         | Y         | Z         |
|------|-----------|-----------|-----------|------|-----------|-----------|-----------|
| C    | -0.681747 | -2.299236 | -1.269863 | C    | 3.836154  | 0.987902  | 3.081800  |
| N    | -0.542337 | -1.581315 | 0.010766  | C    | 3.296494  | -0.181790 | 2.254925  |
| Li   | -1.737316 | -0.049876 | 0.023742  | H    | 3.301533  | -1.118334 | 2.828357  |
| O    | -3.700877 | -0.067842 | 0.401335  | H    | 3.801023  | -0.327885 | 1.296348  |
| C    | -4.630134 | 0.562804  | -0.510872 | H    | 4.610742  | 0.675618  | 3.788869  |
| C    | -5.801092 | -0.410199 | -0.639506 | H    | 4.265467  | 1.754330  | 2.426057  |
| C    | -5.847995 | -1.034253 | 0.763636  | H    | 2.321276  | 0.912078  | 4.646042  |
| C    | -4.363737 | -1.144192 | 1.122223  | H    | 2.650657  | 2.564261  | 4.088833  |
| H    | -3.926028 | -2.090800 | 0.791229  | H    | 1.500577  | 2.182873  | 1.983897  |
| H    | -4.161739 | -1.014588 | 2.188740  | H    | 0.506336  | 1.164840  | 3.061471  |
| H    | -6.350752 | -2.005217 | 0.787057  | C    | -1.780247 | 2.881565  | 0.633442  |
| H    | -6.366823 | -0.366796 | 1.461683  | C    | -1.929160 | 4.203730  | -0.121517 |
| H    | -5.578694 | -1.175246 | -1.391967 | C    | -1.033205 | 3.974970  | -1.348855 |
| H    | -6.730932 | 0.090892  | -0.924097 | C    | -1.286723 | 2.501703  | -1.663930 |
| H    | -4.949334 | 1.524497  | -0.086969 | H    | -0.435103 | 1.993970  | -2.119809 |
| H    | -4.107317 | 0.751217  | -1.452586 | H    | -2.169258 | 2.370246  | -2.304329 |
| O    | -1.553972 | 1.873037  | -0.381742 | H    | 0.020397  | 4.128942  | -1.092360 |
| Li   | 1.389419  | -0.645826 | -0.016374 | H    | -1.279396 | 4.627209  | -2.191647 |
| N    | 2.878329  | -0.228701 | -1.194989 | H    | -1.624725 | 5.062330  | 0.484027  |
| C    | 3.754425  | -1.232399 | -1.779363 | H    | -2.970804 | 4.356688  | -0.428215 |
| H    | 3.830934  | -1.124280 | -2.884370 | H    | -2.668595 | 2.595396  | 1.204922  |
| C    | 5.214729  | -1.179277 | -1.257084 | H    | -0.914244 | 2.896029  | 1.306030  |
| H    | 5.637419  | -0.172016 | -1.347399 | C    | -0.698948 | -2.464036 | 1.175645  |
| H    | 5.249756  | -1.462817 | -0.196012 | H    | -1.628574 | -3.064373 | 1.103570  |
| H    | 5.873193  | -1.864488 | -1.811322 | C    | 0.443067  | -3.488612 | 1.362634  |
| C    | 3.202071  | -2.643177 | -1.535136 | H    | 0.572467  | -4.114201 | 0.473360  |
| H    | 2.221707  | -2.769192 | -2.006842 | H    | 1.396034  | -2.975573 | 1.549363  |
| H    | 3.873678  | -3.417386 | -1.929038 | H    | 0.247141  | -4.156655 | 2.212671  |
| H    | 3.084582  | -2.827401 | -0.457077 | C    | -0.835940 | -1.635307 | 2.462681  |
| C    | 3.140482  | 1.091305  | -1.736714 | H    | -1.676164 | -0.927204 | 2.399977  |
| H    | 4.229507  | 1.298677  | -1.822793 | H    | -1.019477 | -2.279586 | 3.332203  |

**Table 3 (continued).**

|   |          |          |           |   |           |           |           |
|---|----------|----------|-----------|---|-----------|-----------|-----------|
| C | 2.591261 | 2.181375 | -0.802495 | H | 0.078553  | -1.063778 | 2.645328  |
| H | 1.521087 | 2.011752 | -0.607475 | H | 0.099350  | -3.075213 | -1.385813 |
| H | 3.109168 | 2.163116 | 0.162372  | C | -0.478166 | -1.316406 | -2.431250 |
| H | 2.700690 | 3.186374 | -1.234095 | H | -0.535849 | -1.826977 | -3.400734 |
| C | 2.571159 | 1.319659 | -3.163088 | H | -1.264317 | -0.541632 | -2.431145 |
| H | 2.880056 | 2.288704 | -3.583920 | H | 0.497568  | -0.822214 | -2.358892 |
| H | 2.910351 | 0.537308 | -3.850796 | C | -2.028954 | -3.033812 | -1.477931 |
| H | 1.472789 | 1.285353 | -3.149446 | H | -2.056334 | -3.523880 | -2.459793 |
| O | 1.914860 | 0.149780 | 1.950430  | H | -2.208554 | -3.809120 | -0.725350 |
| C | 1.517619 | 1.325880 | 2.671704  | H | -2.868064 | -2.322411 | -1.435257 |
| C | 2.568371 | 1.520798 | 3.767981  |   |           |           |           |

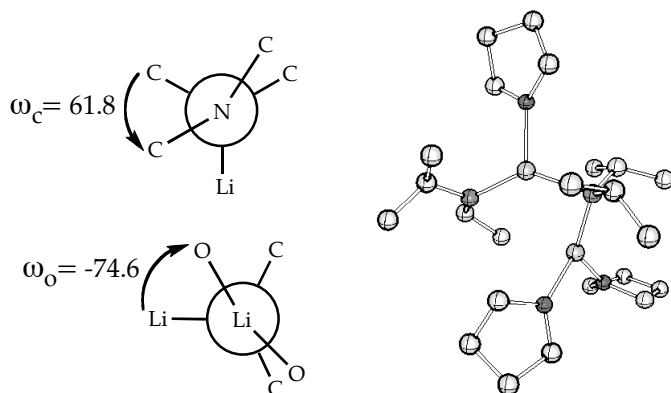

**5b**

$$G = -1295.464704$$

$$G_{\text{MP2}} = -1290.904916$$

$$\Delta G^\ddagger = 12.2 \text{ kcal/mol}$$

$$\Delta G_{\text{MP2}}^\ddagger = 5.5 \text{ kcal/mol}$$

**5b → 14**

(geometry akin to 4)

| Atom | X         | Y         | Z         | Atom | X        | Y         | Z         |
|------|-----------|-----------|-----------|------|----------|-----------|-----------|
| C    | -0.915659 | 1.893773  | 2.086103  | H    | 0.297605 | 2.434192  | -0.678429 |
| N    | -1.442740 | 1.663085  | 0.750524  | H    | 0.984858 | 2.653581  | -2.330595 |
| Li   | -1.409317 | -0.106153 | -0.103283 | H    | 1.909821 | 4.030927  | 0.248068  |
| O    | -3.200214 | -1.152075 | 0.009106  | H    | 1.581972 | 4.799225  | -1.316040 |
| C    | -4.120889 | -0.827099 | 1.079410  | H    | 4.171297 | 4.123534  | -0.731034 |
| C    | -5.507468 | -1.203883 | 0.556493  | H    | 3.535807 | 3.747169  | -2.340189 |
| C    | -5.188165 | -2.397050 | -0.357487 | H    | 4.079941 | 1.504216  | -1.731045 |
| C    | -3.859653 | -1.966750 | -0.983939 | H    | 3.925082 | 1.844944  | 0.008376  |
| H    | -3.200390 | -2.800969 | -1.238567 | O    | 3.234056 | -0.790045 | 0.647088  |
| H    | -4.022254 | -1.360298 | -1.885307 | C    | 4.258464 | -1.558999 | -0.009762 |
| H    | -5.054318 | -3.308609 | 0.237246  | C    | 4.750051 | -2.589672 | 1.030853  |
| H    | -5.960058 | -2.591526 | -1.108424 | C    | 4.170070 | -2.075305 | 2.375830  |
| H    | -6.205958 | -1.447859 | 1.362658  | C    | 3.629927 | -0.684636 | 2.024831  |
| H    | -5.933889 | -0.379285 | -0.026978 | H    | 2.753888 | -0.377977 | 2.597835  |
| H    | -3.994318 | 0.230577  | 1.315366  | H    | 4.409299 | 0.086620  | 2.121394  |
| H    | -3.851607 | -1.420450 | 1.963457  | H    | 3.352513 | -2.719686 | 2.712091  |
| C    | -2.512963 | 2.591249  | 0.408105  | H    | 4.917451 | -2.035459 | 3.173589  |

Table 3 (continued).

|    |           |           |           |   |           |           |           |
|----|-----------|-----------|-----------|---|-----------|-----------|-----------|
| C  | -3.140284 | 2.206898  | -0.941800 | H | 4.379160  | -3.592255 | 0.802051  |
| H  | -3.526504 | 1.181373  | -0.924945 | H | 5.843030  | -2.636312 | 1.045116  |
| H  | -3.969127 | 2.876766  | -1.204960 | H | 5.069539  | -0.883759 | -0.317124 |
| H  | -2.391700 | 2.270047  | -1.742532 | H | 3.809252  | -2.002013 | -0.900406 |
| C  | -2.098184 | 4.084604  | 0.324714  | C | -0.106312 | -2.678801 | -0.293255 |
| H  | -1.371258 | 4.237198  | -0.484348 | C | 0.940462  | -3.753429 | -0.674938 |
| H  | -2.967684 | 4.725472  | 0.122336  | H | 1.944728  | -3.447964 | -0.351333 |
| H  | -1.642804 | 4.441830  | 1.254549  | H | 0.708823  | -4.716300 | -0.198047 |
| H  | -3.348497 | 2.565541  | 1.149093  | H | 0.971246  | -3.924793 | -1.755613 |
| C  | 0.451191  | 1.209587  | 2.247713  | C | -0.156833 | -2.573927 | 1.237448  |
| H  | 1.172034  | 1.611750  | 1.525172  | H | -0.944917 | -1.889518 | 1.570900  |
| H  | 0.862258  | 1.353157  | 3.256605  | H | -0.352229 | -3.552387 | 1.694210  |
| H  | 0.354849  | 0.127508  | 2.082273  | H | 0.800028  | -2.208667 | 1.634791  |
| C  | -1.843117 | 1.423185  | 3.236877  | H | -1.083775 | -3.108808 | -0.606421 |
| H  | -1.960210 | 0.330893  | 3.211776  | C | -0.026881 | -1.416343 | -2.367599 |
| H  | -1.447844 | 1.700544  | 4.225231  | C | -0.885853 | -0.265141 | -2.922368 |
| H  | -2.840497 | 1.869092  | 3.147325  | H | -0.477021 | 0.705250  | -2.615358 |
| H  | -0.728425 | 2.970124  | 2.280740  | H | -0.927525 | -0.275954 | -4.019833 |
| N  | 0.075805  | -1.355492 | -0.898410 | H | -1.916822 | -0.323532 | -2.553953 |
| Li | 1.534677  | -0.188477 | -0.278696 | C | 1.337903  | -1.399430 | -3.101379 |
| O  | 2.139438  | 1.551517  | -0.988125 | H | 1.989448  | -2.206173 | -2.750011 |
| C  | 3.496739  | 2.048597  | -0.979506 | H | 1.221235  | -1.510545 | -4.189119 |
| C  | 3.406642  | 3.554539  | -1.268881 | H | 1.852941  | -0.444754 | -2.922522 |
| C  | 1.970687  | 3.895183  | -0.838133 | H | -0.532797 | -2.354141 | -2.668222 |
| C  | 1.210217  | 2.641853  | -1.255048 |   |           |           |           |

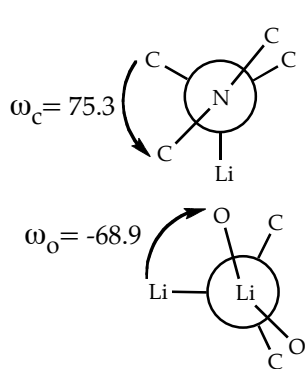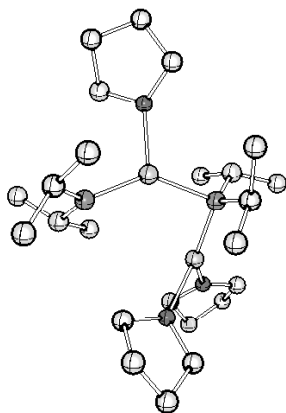

**5c**  
 $G = -1295.463115$   
 $G_{MP2} = -1290.902852$   
 $\Delta G^\ddagger = 13.7$  kcal/mol  
 $\Delta G_{MP2}^\ddagger = 6.8$  kcal/mol  
**12**  $\rightarrow$  **5c**  
 (geometry akin to **4**)

| Atom | X         | Y         | Z         | Atom | X        | Y         | Z        |
|------|-----------|-----------|-----------|------|----------|-----------|----------|
| C    | 0.898529  | 2.043246  | -1.964721 | C    | 1.540648 | -1.407695 | 3.108066 |
| N    | 1.477419  | 1.642439  | -0.695006 | H    | 2.229730 | -0.654568 | 2.702943 |
| Li   | 1.394719  | -0.134025 | 0.109705  | H    | 1.572665 | -1.335040 | 4.203618 |
| N    | -0.040172 | -1.336370 | 1.117720  | H    | 1.923739 | -2.396780 | 2.834891 |

**Table 3 (continued).**

|    |           |           |           |   |           |           |           |
|----|-----------|-----------|-----------|---|-----------|-----------|-----------|
| Li | -1.608175 | -0.447628 | 0.337012  | C | -0.373866 | 0.205858  | 3.017908  |
| O  | -2.454766 | 1.353267  | 0.504322  | H | -1.441755 | 0.341601  | 2.807519  |
| C  | -1.717823 | 2.597663  | 0.344702  | H | -0.228477 | 0.349584  | 4.095831  |
| C  | -2.108973 | 3.422782  | 1.563883  | H | 0.173904  | 0.997222  | 2.491322  |
| C  | -3.597267 | 3.064613  | 1.725907  | H | -0.530787 | -1.906875 | 3.118180  |
| C  | -3.653825 | 1.593286  | 1.274636  | O | 3.161618  | -1.216474 | -0.341585 |
| H  | -3.651262 | 0.899755  | 2.123831  | C | 3.897380  | -0.693132 | -1.471511 |
| H  | -4.531217 | 1.375650  | 0.653998  | C | 5.365715  | -0.799730 | -1.070386 |
| H  | -3.965072 | 3.195232  | 2.747970  | C | 5.373829  | -2.118149 | -0.280218 |
| H  | -4.211356 | 3.689661  | 1.067594  | C | 4.015235  | -2.085626 | 0.436738  |
| H  | -1.532877 | 3.102110  | 2.438779  | H | 3.546458  | -3.072253 | 0.510954  |
| H  | -1.941842 | 4.493608  | 1.415953  | H | 4.096275  | -1.665754 | 1.445335  |
| H  | -2.046919 | 3.083437  | -0.584493 | H | 5.426077  | -2.970500 | -0.967937 |
| H  | -0.655916 | 2.336648  | 0.259858  | H | 6.209736  | -2.201496 | 0.421223  |
| O  | -3.178342 | -1.209090 | -0.705634 | H | 6.039756  | -0.808101 | -1.932567 |
| C  | -3.962795 | -2.408741 | -0.487846 | H | 5.644565  | 0.040749  | -0.424073 |
| C  | -4.933546 | -2.503768 | -1.671459 | H | 3.523801  | 0.318545  | -1.636781 |
| C  | -5.068109 | -1.037898 | -2.112357 | H | 3.684419  | -1.310443 | -2.357245 |
| C  | -3.651846 | -0.516081 | -1.885004 | C | 2.405523  | 2.617628  | -0.139960 |
| H  | -2.993504 | -0.756859 | -2.729864 | C | 3.032477  | 2.066678  | 1.150389  |
| H  | -3.588530 | 0.554360  | -1.681206 | H | 3.523168  | 1.102834  | 0.966725  |
| H  | -5.393877 | -0.926492 | -3.150740 | H | 3.782606  | 2.754301  | 1.561909  |
| H  | -5.780491 | -0.505121 | -1.470951 | H | 2.263229  | 1.914676  | 1.919880  |
| H  | -4.496175 | -3.102868 | -2.478306 | C | 1.805055  | 4.012444  | 0.167403  |
| H  | -5.885745 | -2.962404 | -1.389494 | H | 1.032357  | 3.936332  | 0.944625  |
| H  | -4.490490 | -2.299341 | 0.467257  | H | 2.576455  | 4.707672  | 0.526621  |
| H  | -3.283853 | -3.262004 | -0.416939 | H | 1.345966  | 4.464191  | -0.719377 |
| C  | 0.198782  | -2.718093 | 0.674371  | H | 3.262761  | 2.815185  | -0.823277 |
| C  | -0.694873 | -3.789855 | 1.342783  | C | -0.030683 | 0.934247  | -2.479426 |
| H  | -1.757555 | -3.536542 | 1.227767  | H | -0.813720 | 0.711401  | -1.743422 |
| H  | -0.526334 | -4.777919 | 0.894361  | H | -0.524847 | 1.217678  | -3.418139 |
| H  | -0.496989 | -3.884080 | 2.415653  | H | 0.534699  | 0.009990  | -2.659470 |
| C  | 0.041211  | -2.809834 | -0.851369 | C | 1.904592  | 2.389832  | -3.093279 |
| H  | 0.724441  | -2.122125 | -1.362011 | H | 2.524393  | 1.518957  | -3.345959 |
| H  | 0.260492  | -3.822769 | -1.212267 | H | 1.379549  | 2.706589  | -4.005033 |
| H  | -0.982359 | -2.558281 | -1.159874 | H | 2.577115  | 3.204770  | -2.805202 |
| H  | 1.239829  | -3.036863 | 0.885463  | H | 0.255109  | 2.951408  | -1.873819 |
| C  | 0.106329  | -1.182645 | 2.574487  |   |           |           |           |

**Table 3 (continued).**

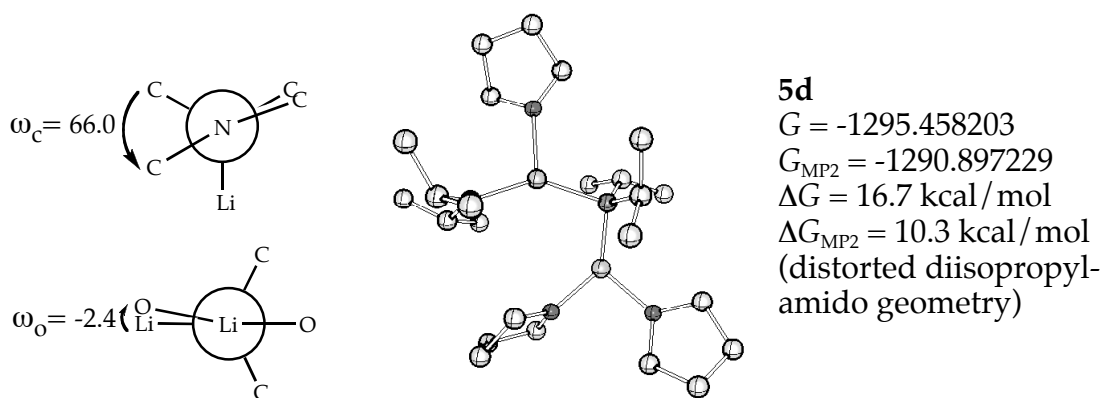

| Atom | X         | Y         | Z         | Atom | X         | Y         | Z         |
|------|-----------|-----------|-----------|------|-----------|-----------|-----------|
| C    | 1.965915  | 2.558584  | -0.629722 | C    | 0.419086  | -3.005458 | 1.767022  |
| N    | 1.946855  | 1.526908  | 0.388941  | H    | 1.249523  | -2.328689 | 2.009196  |
| Li   | 1.315998  | -0.306774 | 0.066784  | H    | 0.120529  | -3.518731 | 2.691123  |
| N    | -0.462082 | -1.517097 | -0.101833 | H    | 0.794215  | -3.770130 | 1.078514  |
| Li   | -1.914866 | -0.209557 | -0.355474 | C    | -1.306298 | -1.236472 | 2.196275  |
| O    | -3.894148 | -0.624685 | -0.297971 | H    | -2.254568 | -0.781294 | 1.874403  |
| C    | -4.890382 | 0.365885  | 0.042944  | H    | -1.502574 | -1.733809 | 3.154243  |
| C    | -5.826328 | -0.334604 | 1.022902  | H    | -0.587536 | -0.430223 | 2.377332  |
| C    | -5.867953 | -1.757170 | 0.443501  | H    | -1.564992 | -2.983571 | 1.006196  |
| C    | -4.435414 | -1.956154 | -0.071657 | O    | 3.048988  | -1.477754 | -0.419943 |
| H    | -3.793418 | -2.451713 | 0.662602  | C    | 4.192904  | -0.727564 | -0.865849 |
| H    | -4.389394 | -2.515965 | -1.009034 | C    | 5.395889  | -1.412829 | -0.201561 |
| H    | -6.149190 | -2.515628 | 1.179623  | C    | 4.915173  | -2.875198 | 0.010947  |
| H    | -6.586098 | -1.808399 | -0.382981 | C    | 3.450440  | -2.851878 | -0.473545 |
| H    | -5.389336 | -0.338215 | 2.028266  | H    | 3.371335  | -3.214574 | -1.509794 |
| H    | -6.810574 | 0.139985  | 1.077616  | H    | 2.765949  | -3.423624 | 0.152645  |
| H    | -5.423802 | 0.671209  | -0.868414 | H    | 5.508741  | -3.599976 | -0.555183 |
| H    | -4.363492 | 1.229637  | 0.450941  | H    | 4.973011  | -3.155579 | 1.067059  |
| O    | -2.046593 | 1.742062  | -0.413040 | H    | 6.294080  | -1.349273 | -0.823649 |
| C    | -2.420150 | 2.598901  | -1.515577 | H    | 5.619944  | -0.935889 | 0.757294  |
| C    | -1.765952 | 3.953746  | -1.235165 | H    | 4.014666  | 0.304053  | -0.563115 |
| C    | -1.711212 | 3.984545  | 0.300301  | H    | 4.257108  | -0.790792 | -1.964169 |
| C    | -1.414071 | 2.526626  | 0.649565  | C    | 2.403399  | 2.004139  | 1.687756  |
| H    | -0.344612 | 2.280668  | 0.652403  | C    | 3.908042  | 1.761486  | 1.989001  |
| H    | -1.862048 | 2.210639  | 1.597524  | H    | 4.553501  | 2.180983  | 1.212585  |
| H    | -0.939908 | 4.658145  | 0.683010  | H    | 4.209261  | 2.200867  | 2.951923  |
| H    | -2.677955 | 4.298516  | 0.713979  | H    | 4.105630  | 0.681710  | 2.039221  |
| H    | -0.752589 | 3.978627  | -1.646705 | C    | 1.601477  | 1.353304  | 2.831220  |
| H    | -2.335603 | 4.783347  | -1.664996 | H    | 1.701802  | 0.258987  | 2.788775  |
| H    | -3.515884 | 2.674404  | -1.544384 | H    | 1.957614  | 1.673705  | 3.819803  |
| H    | -2.075856 | 2.135426  | -2.445449 | H    | 0.535457  | 1.594596  | 2.759021  |
| C    | -0.221610 | -2.429224 | -1.230844 | H    | 2.238168  | 3.100445  | 1.779147  |

**Table 3 (continued).**

|   |           |           |           |   |          |          |           |
|---|-----------|-----------|-----------|---|----------|----------|-----------|
| C | -1.433667 | -3.292579 | -1.656487 | C | 1.406818 | 1.999395 | -1.947266 |
| H | -2.244048 | -2.655687 | -2.039336 | H | 0.420601 | 1.546183 | -1.791771 |
| H | -1.155869 | -3.992811 | -2.455542 | H | 1.312363 | 2.779249 | -2.714816 |
| H | -1.833187 | -3.887960 | -0.828482 | H | 2.071194 | 1.222980 | -2.349344 |
| C | 0.245659  | -1.629014 | -2.454992 | C | 3.325628 | 3.241439 | -0.937316 |
| H | 1.189444  | -1.109572 | -2.262975 | H | 4.068491 | 2.509942 | -1.282617 |
| H | 0.396209  | -2.282521 | -3.323572 | H | 3.210530 | 4.002993 | -1.722546 |
| H | -0.504134 | -0.874394 | -2.735368 | H | 3.733150 | 3.745308 | -0.055398 |
| H | 0.589773  | -3.148509 | -1.003318 | H | 1.300839 | 3.418065 | -0.345512 |
| C | -0.765600 | -2.226543 | 1.149878  |   |          |          |           |

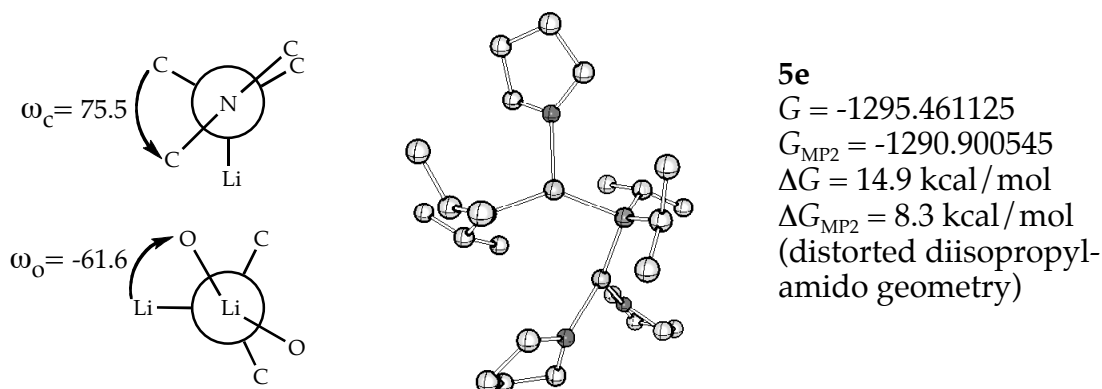

| Atom | X         | Y         | Z         | Atom | X         | Y         | Z         |
|------|-----------|-----------|-----------|------|-----------|-----------|-----------|
| C    | 1.063602  | 2.382851  | -1.371190 | C    | 1.230290  | -2.201977 | 2.806660  |
| N    | 1.651651  | 1.659754  | -0.263044 | H    | 1.984574  | -1.418184 | 2.651615  |
| Li   | 1.373630  | -0.219289 | 0.182878  | H    | 1.200541  | -2.431178 | 3.880548  |
| N    | -0.211854 | -1.473457 | 0.844015  | H    | 1.568444  | -3.106754 | 2.290319  |
| Li   | -1.660635 | -0.227094 | 0.356211  | C    | -0.585209 | -0.502201 | 3.090433  |
| O    | -3.412935 | -0.789480 | -0.518473 | H    | -1.616133 | -0.206361 | 2.852917  |
| C    | -4.478871 | -1.269065 | 0.338866  | H    | -0.540106 | -0.692682 | 4.169995  |
| C    | -5.436816 | -2.038532 | -0.575195 | H    | 0.068955  | 0.350291  | 2.874048  |
| C    | -5.233070 | -1.337222 | -1.927686 | H    | -0.858801 | -2.543734 | 2.577758  |
| C    | -3.732809 | -1.047009 | -1.906111 | O    | 3.093866  | -1.308096 | -0.376745 |
| H    | -3.149479 | -1.909484 | -2.250432 | C    | 3.779387  | -0.862617 | -1.559840 |
| H    | -3.439399 | -0.168451 | -2.487891 | C    | 5.261954  | -1.182828 | -1.306837 |
| H    | -5.526039 | -1.952970 | -2.782945 | C    | 5.218970  | -2.339459 | -0.269247 |
| H    | -5.805157 | -0.402713 | -1.967217 | C    | 3.713288  | -2.549023 | -0.017011 |
| H    | -5.137528 | -3.090475 | -0.643201 | H    | 3.311950  | -3.354311 | -0.651051 |
| H    | -6.470098 | -2.001240 | -0.218317 | H    | 3.457874  | -2.758680 | 1.021919  |
| H    | -4.963883 | -0.400101 | 0.800832  | H    | 5.693806  | -3.254552 | -0.636670 |
| H    | -4.035371 | -1.887320 | 1.124735  | H    | 5.729041  | -2.050433 | 0.654566  |



**Table 3 (continued).**

|   |           |           |           |   |           |           |           |
|---|-----------|-----------|-----------|---|-----------|-----------|-----------|
| O | -2.250754 | 1.611036  | 0.849502  | H | 5.775953  | -1.465418 | -2.230767 |
| C | -3.400880 | 2.312855  | 0.347949  | H | 5.775406  | -0.310013 | -0.893344 |
| C | -2.860215 | 3.663694  | -0.110487 | H | 3.543015  | 0.195107  | -1.673955 |
| C | -1.827806 | 3.974689  | 0.986901  | H | 3.396330  | -1.423287 | -2.427572 |
| C | -1.301801 | 2.585023  | 1.393344  | C | 2.542353  | 2.483620  | 0.545919  |
| H | -0.324377 | 2.336838  | 0.963791  | C | 4.047212  | 2.413015  | 0.165214  |
| H | -1.268079 | 2.457877  | 2.480087  | H | 4.214098  | 2.634249  | -0.892200 |
| H | -1.021782 | 4.622867  | 0.633839  | H | 4.650969  | 3.117480  | 0.756828  |
| H | -2.313940 | 4.471013  | 1.834931  | H | 4.428481  | 1.401886  | 0.360461  |
| H | -2.366788 | 3.558202  | -1.082699 | C | 2.439280  | 2.108380  | 2.038358  |
| H | -3.641740 | 4.425055  | -0.197338 | H | 2.686769  | 1.046199  | 2.180995  |
| H | -4.142160 | 2.433927  | 1.153201  | H | 3.136919  | 2.688335  | 2.657635  |
| H | -3.836582 | 1.702025  | -0.444745 | H | 1.428038  | 2.268877  | 2.425445  |
| C | -0.143747 | -2.714545 | 0.057826  | H | 2.251037  | 3.554831  | 0.471870  |
| C | -1.356364 | -3.663875 | 0.224260  | C | 0.005809  | 1.511935  | -2.068766 |
| H | -2.271387 | -3.177005 | -0.136933 | H | -0.782855 | 1.221392  | -1.363461 |
| H | -1.215209 | -4.591721 | -0.346702 | H | -0.470290 | 2.040448  | -2.905346 |
| H | -1.517377 | -3.948244 | 1.269502  | H | 0.462333  | 0.596602  | -2.467610 |
| C | 0.017867  | -2.389268 | -1.435065 | C | 2.029340  | 2.920105  | -2.462082 |
| H | 0.947605  | -1.844082 | -1.626586 | H | 2.596913  | 2.098118  | -2.919564 |
| H | 0.036108  | -3.303304 | -2.042417 | H | 1.477023  | 3.439230  | -3.259284 |
| H | -0.814385 | -1.769442 | -1.795295 | H | 2.745843  | 3.634980  | -2.046605 |
| H | 0.744980  | -3.317755 | 0.333735  | H | 0.524436  | 3.298516  | -1.013325 |
| C | -0.153013 | -1.739722 | 2.291049  |   |           |           |           |

## Note: Basis Set Superposition Errors

Basis set superposition errors (BSSE) arise from the inconsistent basis set treatment of molecular fragments at varying proximity (e.g. A-B versus A—B). At shorter intermolecular distances (A-B) fragments *A* and *B* access additional functions from its neighboring fragment (*B* and *A*), but at large intermolecular distances (A—B) the fragments are too far away for its basis set functions to provide stabilization (a result of insufficient overlap integrals). Only in the limit of a complete basis set (CBS), the BSSE would be reduced to zero.

Because CBS is computationally prohibitive in our case, we attempted to correct for BSSE using the counterpoise method by Boyes. This led to relative energies that were much reduced. The longer the intermolecular distance between *A* and *B*, the more the energy was corrected by the BSSE correction. With this approach, however, one can only compare geometries if the selected fragments are identical. This prohibits a comprehensive energy correction for all structures in scheme 2. However, it does serve as a useful check for the extent of BSSE for selected geometries.

Alternatively, single-point energies were computed at the B3LYP level of theory using the aug-pVDZ basis set that is commonly used to reduce basis set superposition errors—a large increase in basis set at the MP2 level of theory was not possible due to the molecular size. Indeed, the relative energies of like aggregates was reduced. A comparison in energies between unlike aggregates using B3LYP, however, has consistently led to large energy errors as evident from B3LYP-derived relative energies of THF-solvated LDA monomers. For a consistent calculation of energies we were therefore restricted to the method of MP2/6-31G(d) and spot-checked for BSSE where possible with the counterpoise correction.

It is worth noting that not only energies but geometries as well are affected by BSSE. Transition structures **17-19** needed to be optimized with an additional diffuse function (6-31+G(d)) for successful convergence. Transition state optimization with counterpoise correction also led to convergence but with an O-Li distance 0.2-0.3 Å shorter on average. Even though this geometry is likely to be superior to the BSSE-uncorrected geometry, we could not include it in the comprehensive scheme because the resulting energies would not be comparable to those that were not corrected during optimization.

We therefore conclude that basis set errors need serious consideration in energy calculations as well as geometry optimizations but often cannot be comprehensively corrected. In addition we would like to caution that an increase in basis set is not always beneficial and that lower basis sets are adequate as long as one acknowledges its limitations and conducts qualitative checks for its deficiencies. In our experience a judicious level of theory is more important and meaningful for an effective computational outcome.

## References

1. Gaussian 09, Revision A.1, Frisch, M. J.; Trucks, G. W.; Schlegel, H. B.; Scuseria, G. E.; Robb, M. A.; Cheeseman, J. R.; Scalmani, G.; Barone, V.; Mennucci, B.; Petersson, G. A.; Nakatsuji, H.; Caricato, M.; Li, X.; Hratchian, H. P.; Izmaylov, A. F.; Bloino, J.; Zheng, G.; Sonnenberg, J. L.; Hada, M.; Ehara, M.; Toyota, K.; Fukuda, R.; Hasegawa, J.; Ishida, M.; Nakajima, T.; Honda, Y.; Kitao, O.; Nakai, H.; Vreven, T.; Montgomery, Jr., J. A.; Peralta, J. E.; Ogliaro, F.; Bearpark, M.; Heyd, J. J.; Brothers, E.; Kudin, K. N.; Staroverov, V. N.; Kobayashi, R.; Normand, J.; Raghavachari, K.; Rendell, A.; Burant, J. C.; Iyengar, S. S.; Tomasi, J.; Cossi, M.; Rega, N.; Millam, N. J.; Klene, M.; Knox, J. E.; Cross, J. B.; Bakken, V.; Adamo, C.; Jaramillo, J.; Gomperts, R.; Stratmann, R. E.; Yazyev, O.; Austin, A. J.; Cammi, R.; Pomelli, C.; Ochterski, J. W.; Martin, R. L.; Morokuma, K.; Zakrzewski, V. G.; Voth, G. A.; Salvador, P.; Dannenberg, J. J.; Dapprich, S.; Daniels, A. D.; Farkas, Ö.; Foresman, J. B.; Ortiz, J. V.; Cioslowski, J.; Fox, D. J. Gaussian, Inc., Wallingford CT, 2009.
2. *Gaussview*, Version 3.09, Dennington 2, R.; Keith, T.; Millam, J.; Eppinett, K.; Hovell, W. L.; Gilliland, R.; Semichem, Inc.; Shawnee Mission, KS, 2003.
